# Supplementary material for: Transposable Elements in TDP-43-Mediated Neurodegenerative Disorders
Source: PLoS One. 2012 Sep 5;7(9):e44099. doi: 10.1371/journal.pone.0044099 (PMC3434193; doi:10.1371/journal.pone.0044099)
Supplement: Table S3 — Enriched and depleted repetitive elements rat TDP-43-IP/control-IP RIP-seq. Enriched and depleted repetitive elements in Human TDP-43 Healthy/FTLD CLIP-seq. Enriched repetitive elements in mouse TDP-43 CLIP-seq. Induced repetitive elements expression after depletion of TDP-43 with ASO (mouse mRNA-seq). (overlap with mouse CLIP binding sites shown). Induced repetitive elements expression in transgenic mice overexpressing human TDP-43 (mouse mRNA-seq). (overlap with mouse CLIP binding sites shown). (XLS) [file pone.0044099.s004.xls]

## Sheet: RAT TDP43 enriched
			TDP-43 enriched
class	family	annotation	chrom	start	end	length	strand	tdp43	control	Fold change	p-value
SINE	B2	B3A	chr16	85472966	85473150	184	-	294.073	0	295.073	9.31005e-13
LTR	ERVL	LTR16A	chr8	29533830	29534231	401	+	287.363	0	288.363	1.38496e-12
SINE	B4	B4A	chr10	42641250	42641494	244	-	260.992	0	261.992	2.0152e-12
SINE	B4	B4A	chr4	30643786	30644076	290	-	246.926	0	247.926	8.10559e-12
SINE	B4	B4A	chr2	254768885	254769178	293	-	232.646	0	233.646	8.78719e-13
SINE	Alu	B1F	chr16	70428119	70428267	148	+	229.333	0	230.333	3.08578e-12
LTR	ERVL-MaLR	ORR1C2	chr2	144985152	144985464	312	+	221.144	0	222.144	3.55983e-12
SINE	Alu	PB1D7	chr3	108267704	108267824	120	-	217.191	0	218.191	3.21116e-12
SINE	B2	B3A	chr3	75529096	75529281	185	+	213.27	0	214.27	3.40868e-12
SINE	Alu	B1_Mur4	chr6	136583941	136584047	106	-	210	0	211	1.59757e-11
LTR	ERVK	RMER20B	chr6	14589738	14590116	378	+	205.764	0	206.764	8.44042e-13
SINE	B2	B3A	chr1	44950922	44951122	200	-	203.499	0	204.499	8.61143e-13
LTR	ERVK	RLTR25A	chr13	37275857	37276820	943	-	199.794	0	200.794	1.28116e-12
SINE	Alu	B1F2	chr3	89709245	89709380	135	+	197.327	0	198.327	3.07819e-12
SINE	B4	B4A	chr13	36957013	36957261	248	+	196.749	0	197.749	8.17627e-13
DNA	hAT-Charlie	MER5A1	chr6	134410214	134410370	156	-	195.066	0	196.066	2.6548e-12
SINE	B4	ID_B1	chr1	175538558	175538750	192	+	193.5	0	194.5	7.81482e-13
SINE	B4	B4A	chr20	47059435	47059745	310	+	192.232	0	193.232	8.70017e-13
SINE	B4	B4	chr7	27715769	27716052	283	-	187.681	0	188.681	9.37582e-13
LTR	ERVK	RLTR22_Mur	chr9	37478869	37479015	146	-	187.027	0	188.027	1.40512e-12
SINE	B2	B3A	chr12	25091300	25091478	178	+	185	0	186	1.23845e-12
SINE	B2	B3A	chr13	36584683	36584902	219	+	183.883	0	184.883	1.38244e-12
SINE	B4	B4A	chr13	36989075	36989344	269	+	183.115	0	184.115	1.25543e-12
SINE	B4	B4A	chr2	204201429	204201684	255	-	180.826	0	181.826	8.11274e-13
rRNA	rRNA	LSU-rRNA_Hsa	chr6	28502940	28503206	266	+	1472.89	7.13119	181.264	6.17841e-07
SINE	B4	B4A	chr2	82461508	82461651	143	-	174.213	0	175.213	2.04393e-12
SINE	B4	B4A	chr8	46046135	46046402	267	+	173.489	0	174.489	7.37279e-13
LTR	ERVL-MaLR	MTB_Rn	chr1	119865853	119866241	388	+	170.096	0	171.096	8.30728e-13
SINE	B4	B4	chr5	125289841	125290131	290	-	168.844	0	169.844	3.37031e-12
SINE	B4	B4A	chr11	14035016	14035286	270	+	168.416	0	169.416	1.1564e-12
SINE	B4	B4A	chr18	66200141	66200334	193	-	168.059	0	169.059	1.52691e-12
SINE	B4	B4A	chr13	37083563	37083826	263	+	168.028	0	169.028	1.99667e-12
SINE	MIR	MIR	chr1	175539471	175539732	261	+	167.133	0	168.133	7.81482e-13
SINE	B4	RSINE1	chr3	108267437	108267565	128	-	166.46	0	167.46	3.21116e-12
LTR	ERVL-MaLR	MLT1D	chr4	111417355	111417626	271	-	163.781	0	164.781	1.60071e-12
SINE	B4	B4A	chr15	76626029	76626317	288	+	504.227	2.07	164.569	8.22815e-13
LTR	ERVL-MaLR	MTD	chr1	8812075	8812478	403	+	163.305	0	164.305	7.60291e-13
LTR	ERVK	RLTR21	chr16	14725973	14726269	296	-	163.179	0	164.179	8.62301e-13
LTR	ERVL-MaLR	MLT1H1	chr8	29535005	29535181	176	+	162.208	0	163.208	1.38496e-12
LTR	ERVL-MaLR	MLT1A0	chr6	138063094	138063294	200	-	161.399	0	162.399	8.19902e-13
SINE	B2	B3A	chr13	12351708	12351899	191	-	796.712	3.933	161.709	1.14621e-12
SINE	B4	B4A	chr1	118974278	118974505	227	-	159.204	0	160.204	7.68286e-13
SINE	B2	B3A	chr13	40305594	40305737	143	+	157.768	0	158.768	7.7734e-13
SINE	B2	B3	chr8	77311997	77312136	139	-	157.69	0	158.69	4.90152e-12
LTR	ERVK	RMER6D	chr7	63217816	63218160	344	+	156.778	0	157.778	1.20184e-12
SINE	B2	B3	chr6	15338207	15338372	165	-	156.186	0	157.186	1.77776e-12
SINE	B4	B4A	chr12	11044773	11045028	255	+	154.227	0	155.227	5.88827e-12
SINE	B4	RSINE1	chr1	158165144	158165309	165	-	152.384	0	153.384	2.03464e-12
SINE	B4	B4	chr18	66061481	66061771	290	-	152.087	0	153.087	8.51558e-13
SINE	ID	ID_Rn1	chr2	204129863	204129959	96	+	151.88	0	152.88	1.26795e-10
LTR	ERVL-MaLR	MTD	chr12	25874700	25875005	305	-	151.071	0	152.071	7.37279e-13
SINE	B4	B4A	chr20	13496901	13497162	261	+	149.727	0	150.727	7.37279e-13
SINE	Alu	B1F2	chr7	110535325	110535418	93	+	148.542	0	149.542	1.32521e-12
DNA	hAT-Charlie	MER5A	chr1	98829282	98829398	116	+	148.021	0	149.021	7.56278e-13
LTR	ERVL-MaLR	MTC	chr1	227118470	227118846	376	-	145.719	0	146.719	1.86397e-12
SINE	B4	RSINE1	chr5	151110257	151110389	132	+	145.526	0	146.526	1.80219e-12
SINE	B4	B4A	chr12	25643244	25643512	268	-	145.37	0	146.37	2.65773e-12
SINE	B2	B3	chrX	91585894	91586068	174	+	143.406	0	144.406	1.20184e-12
LTR	ERVL-MaLR	ORR1C1	chr16	15319090	15319452	362	-	143.4	0	144.4	1.28589e-12
LTR	ERVL	MT2B	chr6	136583944	136584140	196	-	143.387	0	144.387	1.59757e-11
SINE	B2	B3A	chr16	85408994	85409135	141	-	142.806	0	143.806	1.87668e-12
SINE	B4	B4	chr12	27000988	27001288	300	+	142.135	0	143.135	9.21182e-13
SINE	B4	B4	chr8	19725269	19725502	233	+	141.779	0	142.779	8.55567e-13
SINE	B4	B4A	chr20	53799888	53800163	275	+	141	0	142	8.0335e-13
SINE	B4	B4A	chr13	36819166	36819452	286	+	434.778	2.07	141.947	8.07576e-13
LTR	ERVK	RMER17C	chr2	224485616	224486018	402	+	139.851	0	140.851	7.29132e-13
LTR	ERVL	MT2A	chr13	12367849	12368102	253	+	139.041	0	140.041	9.81139e-13
SINE	B4	B4	chr13	36777185	36777470	285	+	137.989	0	138.989	1.18285e-12
SINE	B2	B3A	chr4	7708627	7708741	114	+	137.937	0	138.937	1.00161e-12
SINE	B4	B4A	chr13	93086541	93086783	242	+	136.643	0	137.643	9.81139e-13
DNA	hAT-Charlie	MER20	chr2	82265527	82265709	182	-	136	0	137	1.46294e-12
LTR	ERVK	RMER6D	chr7	63217410	63217769	359	+	135.79	0	136.79	1.20184e-12
SINE	B4	B4A	chr8	112243647	112243916	269	+	135.516	0	136.516	8.04536e-13
SINE	B4	B4A	chr7	103544661	103544914	253	+	135.333	0	136.333	4.22908e-12
SINE	B2	B3A	chr5	144071438	144071612	174	+	416.916	2.07	136.129	4.55976e-11
SINE	B4	B4	chr13	36608166	36608441	275	+	134.452	0	135.452	1.2876e-12
SINE	B4	ID_B1	chr13	37083356	37083482	126	+	134.138	0	135.138	1.99667e-12
LTR	ERVL-MaLR	MTD	chr4	15538633	15538925	292	-	134	0	135	1.39757e-12
LTR	ERVL	MER21B	chr14	28940189	28940645	456	-	133.648	0	134.648	2.27884e-12
SINE	B2	B3A	chr15	76103542	76103724	182	+	132.544	0	133.544	2.09342e-12
SINE	B4	B4	chr2	111611469	111611663	194	+	403.334	2.07	131.705	1.60071e-12
SINE	B2	B3A	chr7	63151714	63151905	191	-	129.802	0	130.802	8.16656e-13
SINE	B4	B4A	chr16	1045784	1046066	282	-	129.322	0	130.322	7.9732e-13
LTR	ERVL	MLT2B2	chr2	111662932	111663065	133	+	129.114	0	130.114	2.85693e-12
LTR	ERVL-MaLR	MTC	chr2	145322992	145323366	374	-	128.883	0	129.883	7.45975e-13
LTR	ERVK	RLTR11B	chr7	1711500	1711928	428	-	128.833	0	129.833	1.25895e-12
SINE	B2	B3A	chr4	121016268	121016459	191	-	128.167	0	129.167	8.58505e-13
SINE	B4	B4A	chr4	173171467	173171737	270	+	127.627	0	128.627	7.56278e-13
SINE	B4	B4A	chr8	48456887	48457077	190	-	127.443	0	128.443	9.51622e-13
SINE	B4	B4A	chr1	134086719	134087006	287	+	127.299	0	128.299	7.82109e-13
SINE	B4	B4	chr9	46417588	46417841	253	-	127.25	0	128.25	1.23669e-12
SINE	B2	B3A	chr14	36013715	36013888	173	+	125.79	0	126.79	1.14621e-12
SINE	B4	B4	chr16	15462964	15463295	331	+	125.627	0	126.627	1.75031e-12
SINE	B2	B3	chr5	59393047	59393262	215	+	125.267	0	126.267	1.47965e-12
SINE	MIR	MIR	chr8	29533238	29533375	137	-	124.998	0	125.998	1.38496e-12
SINE	B4	B4A	chr6	14790145	14790407	262	+	124.061	0	125.061	1.38701e-12
SINE	B4	B4A	chrX	146799758	146800016	258	-	380.505	2.07	124.269	4.73359e-12
SINE	B2	B3	chr7	130608693	130608873	180	-	123.204	0	124.204	2.41464e-12
SINE	MIR	MIR	chr3	145991247	145991461	214	+	122.549	0	123.549	1.4184e-12
SINE	B4	B4A	chr3	159431033	159431253	220	+	122.496	0	123.496	7.98282e-13
SINE	B4	B4A	chr1	40533171	40533455	284	-	122.033	0	123.033	1.21767e-12
SINE	B4	B4A	chr6	94111269	94111485	216	-	121.577	0	122.577	8.30728e-13
SINE	B4	RSINE1	chr13	36844245	36844375	130	+	121.442	0	122.442	9.11554e-13
SINE	B4	B4A	chr2	82525331	82525619	288	-	121.261	0	122.261	7.98824e-13
SINE	B2	B3A	chr7	60591823	60592030	207	+	121.241	0	122.241	8.53136e-13
SINE	B4	RSINE1	chr1	143886027	143886183	156	-	121.114	0	122.114	8.60776e-13
SINE	B4	ID_B1	chr5	144450983	144451174	191	+	121	0	122	4.30289e-12
SINE	B4	B4	chr10	9683198	9683365	167	+	120.89	0	121.89	6.48472e-13
SINE	B4	RSINE1	chr4	146423106	146423270	164	-	119.944	0	120.944	1.01026e-12
LTR	ERVL-MaLR	MTD	chr20	19620593	19620851	258	+	119.047	0	120.047	8.01601e-13
SINE	Alu	PB1D10	chr10	46835032	46835146	114	+	119	0	120	3.00638e-12
SINE	B4	B4A	chr2	145176759	145177010	251	+	118.759	0	119.759	2.02915e-12
SINE	B4	RSINE1	chr2	224538726	224538871	145	+	118.405	0	119.405	8.09616e-13
SINE	B4	B4A	chr20	30027899	30028155	256	+	118.342	0	119.342	1.84721e-12
SINE	B2	B3A	chr4	180422717	180422879	162	+	118.28	0	119.28	1.32845e-12
LTR	ERVL	ERVL-B4	chr1	4326659	4327144	485	+	118.186	0	119.186	1.57578e-12
SINE	B2	B3A	chr10	20197774	20197934	160	-	132.685	0.121765	119.174	1.60071e-12
SINE	B4	B4A	chr7	129358032	129358229	197	+	118.062	0	119.062	2.50933e-12
SINE	Alu	PB1D10	chr2	182757791	182757894	103	+	118	0	119	6.25976e-12
SINE	ID	ID4_	chr1	148247163	148247223	60	-	118	0	119	9.81139e-13
SINE	B4	RSINE1	chr3	133205998	133206264	266	-	117.974	0	118.974	2.96057e-12
SINE	MIR	MIRb	chr8	29532858	29532990	132	+	117	0	118	1.38496e-12
LTR	ERVL	MT2A	chr10	66910083	66910460	377	-	115.681	0	116.681	7.98409e-13
SINE	B4	B4A	chr10	3076755	3076979	224	+	115.627	0	116.627	1.44499e-12
LTR	ERVL-MaLR	MLT1A1	chr10	20197008	20197161	153	-	114.846	0	115.846	1.60071e-12
SINE	B4	RSINE1	chr9	20688193	20688333	140	+	114.725	0	115.725	8.61143e-13
SINE	B4	RSINE1	chr3	49581279	49581458	179	-	114.605	0	115.605	7.56278e-13
SINE	B4	RSINE1	chr11	82618993	82619141	148	-	114.475	0	115.475	9.25726e-13
SINE	Alu	B1F1	chr3	133021353	133021485	132	+	114.417	0	115.417	8.05344e-13
SINE	B4	B4A	chr4	111002735	111002986	251	+	114.039	0	115.039	1.29941e-12
LTR	ERVL-MaLR	MLT1C	chr6	113190960	113191441	481	+	114	0	115	1.14621e-12
SINE	B4	RSINE1	chr16	62511850	62512015	165	+	113.21	0	114.21	7.75641e-12
LTR	ERVL-MaLR	MLT1B	chr2	89847727	89847974	247	+	113.043	0	114.043	8.20309e-13
SINE	B2	B3A	chr8	77312947	77313098	151	-	111.964	0	112.964	4.90152e-12
SINE	Alu	B1_Rn	chr7	89626204	89626337	133	-	111.731	0	112.731	1.65858e-12
SINE	B4	B4	chr4	182664750	182664987	237	+	111.532	0	112.532	1.41753e-12
SINE	B2	B3	chr7	84920079	84920275	196	+	111.481	0	112.481	9.11554e-13
LTR	ERVL	MT2B	chr10	21589216	21589385	169	+	111.311	0	112.311	3.8393e-12
SINE	B2	B3A	chr5	92100210	92100373	163	-	111	0	112	2.45071e-12
LTR	ERVL-MaLR	MTC	chr6	106591570	106591925	355	-	138.973	0.25875	111.2	8.24609e-13
SINE	B4	RSINE1	chr16	15665498	15665627	129	+	110.059	0	111.059	4.26962e-12
SINE	B2	B3A	chr1	25389965	25390131	166	-	109.928	0	110.928	8.9008e-13
SINE	B4	B4	chr7	117601505	117601568	63	+	109.865	0	110.865	1.51186e-12
LTR	ERVK	RLTR11A2	chr13	36764196	36764704	508	+	109.833	0	110.833	7.64087e-13
SINE	B4	RSINE1	chr7	137523186	137523330	144	+	109.579	0	110.579	8.01344e-13
SINE	Alu	B1_Mur1	chr8	114450311	114450451	140	+	109.004	0	110.004	1.23845e-12
LINE	L1	HAL1	chr5	125205846	125206210	364	-	109	0	110	1.38496e-12
LTR	ERVL	MER74A	chr2	82492520	82492924	404	-	108.665	0	109.665	8.01825e-13
LTR	ERVL	MLT2B4	chr7	58881485	58881670	185	+	108.541	0	109.541	9.74673e-13
SINE	B4	ID_B1	chr8	19526744	19526931	187	+	108	0	109	1.46913e-12
SINE	B4	ID_B1	chr12	19634876	19635064	188	+	107.903	0	108.903	8.92116e-12
SINE	Alu	B1F	chr2	232961475	232961614	139	-	107.828	0	108.828	7.98824e-13
SINE	B4	ID_B1	chr17	82552321	82552503	182	+	107.512	0	108.512	8.02699e-13
SINE	B4	B4A	chr1	227258717	227258980	263	-	163.603	0.5175	108.47	9.47596e-13
SINE	B2	B3A	chr1	15634885	15635025	140	-	107.072	0	108.072	1.75707e-12
LTR	ERVL-MaLR	MTD	chr12	28973737	28974118	381	+	106.786	0	107.786	3.46418e-12
LTR	ERVL-MaLR	MLT1I	chr6	88973576	88973869	293	+	329.588	2.07	107.683	5.4889e-12
SINE	B4	B4	chr18	17495522	17495802	280	+	106.251	0	107.251	8.10004e-13
SINE	B4	B4A	chr8	29327132	29327385	253	-	105.987	0	106.987	8.37938e-13
SINE	B4	B4A	chr8	48460845	48461062	217	-	105.96	0	106.96	9.51622e-13
LTR	ERVK	RLTR20C	chr9	46387547	46387971	424	+	105.813	0	106.813	1.22664e-12
LTR	ERVL-MaLR	ORR1A3	chr11	74123475	74123622	147	-	142.591	0.345001	106.759	4.15953e-11
LTR	ERVL	MLT2B2	chr14	29005663	29006091	428	-	105.751	0	106.751	8.77104e-13
LINE	L2	L2	chr13	49173612	49174015	403	-	105	0	106	8.78594e-13
LTR	ERV1	RLTR24	chr4	56676830	56677190	360	-	104.896	0	105.896	7.98637e-13
SINE	B4	ID_B1	chr2	180815627	180815747	120	-	104.5	0	105.5	1.76505e-12
LTR	ERVL-MaLR	MLT1B	chr12	25301809	25302057	248	+	104	0	105	2.93329e-12
SINE	B2	B3	chr6	136407071	136407252	181	-	103.906	0	104.906	1.38606e-12
SINE	B4	B4A	chr4	111408043	111408296	253	+	103.598	0	104.598	1.38496e-12
SINE	B4	B4A	chr10	102793672	102793946	274	+	103	0	104	1.1913e-12
SINE	B4	RSINE1	chr7	48930929	48931099	170	+	102.858	0	103.858	7.37279e-13
SINE	B4	ID_B1	chr7	139707124	139707242	118	-	102.667	0	103.667	3.67563e-12
Other	Other	RMER1B	chr18	28228668	28228978	310	+	102.502	0	103.502	5.25864e-13
LTR	ERVL-MaLR	ORR1A4	chr5	28258266	28258636	370	-	102.39	0	103.39	8.00854e-13
SINE	B4	B4A	chr2	79369241	79369512	271	-	101.423	0	102.423	5.33081e-12
SINE	B4	B4A	chr9	21422429	21422738	309	+	101.282	0	102.282	1.19985e-12
SINE	B4	B4A	chr2	203636936	203637225	289	+	101.041	0	102.041	2.12739e-12
LTR	ERVL-MaLR	MLT1A0	chr1	40913414	40913723	309	-	101.026	0	102.026	8.30728e-13
SINE	B4	B4A	chr2	12364350	12364452	102	-	101	0	102	4.07442e-12
SINE	B4	B4A	chr2	111648238	111648515	277	+	100.511	0	101.511	1.6074e-12
SINE	B2	B3A	chr16	70712946	70713101	155	-	100.169	0	101.169	2.66476e-12
LTR	ERVK	RLTR11A2	chrX	26118474	26118890	416	+	100.041	0	101.041	1.19452e-12
SINE	B4	RSINE1	chr2	182758266	182758382	116	+	100	0	101	6.25976e-12
DNA	TcMar-Tigger	MER82	chr8	58284431	58284864	433	+	100	0	101	1.19365e-12
SINE	B4	B4	chr14	79296368	79296651	283	+	99.6851	0	100.685	2.28879e-12
LTR	ERVL-MaLR	MTE2a	chr6	113191699	113191984	285	+	99.0919	0	100.092	1.14621e-12
SINE	B4	B4A	chr10	9656462	9656732	270	+	99.0094	0	100.009	8.09213e-13
LTR	ERVL-MaLR	ORR1C1	chr16	85148655	85148912	257	-	98.5	0	99.5	1.32521e-12
SINE	B4	RSINE1	chr5	16175036	16175185	149	-	98.4	0	99.4	8.30728e-13
SINE	B4	B4	chr14	66472753	66473021	268	-	98.1644	0	99.1644	2.76275e-12
LTR	ERVL-MaLR	MTEb	chr1	46465232	46465574	342	+	98	0	99	1.87668e-12
SINE	B4	RSINE1	chr12	26318418	26318539	121	-	97.8736	0	98.8736	8.28616e-13
SINE	B4	RSINE1	chr4	7761620	7761764	144	+	97.7667	0	98.7667	1.14982e-12
SINE	B4	B4	chr1	25463635	25463771	136	-	97.5	0	98.5	8.28556e-13
LTR	ERVK	RLTR40	chr16	18845743	18845875	132	+	111.017	0.138	98.4332	1.04128e-12
SINE	B4	B4A	chr5	87637969	87638228	259	+	97.4248	0	98.4248	1.20649e-12
SINE	B4	B4A	chr9	37815065	37815309	244	+	97.0785	0	98.0785	1.53725e-12
SINE	B4	B4A	chr9	24082543	24082816	273	+	97	0	98	1.30977e-12
SINE	B4	B4A	chr7	10163258	10163414	156	-	96.852	0	97.852	1.42892e-12
SINE	MIR	MIRb	chr3	145991941	145992099	158	-	96.5303	0	97.5303	1.4184e-12
SINE	B4	B4A	chr18	66045368	66045469	101	-	96.2874	0	97.2874	8.11965e-13
SINE	B2	B3A	chr4	67479265	67479453	188	+	96.0749	0	97.0749	1.28152e-12
SINE	Alu	B1_Mur2	chr5	137434532	137434649	117	+	96	0	97	3.07025e-12
SINE	B4	B4A	chr13	36998781	36999039	258	+	95.6928	0	96.6928	1.43474e-12
DNA	hAT-Charlie	RCHARR1	chr1	97042002	97042382	380	+	95.5304	0	96.5304	1.14621e-12
SINE	Alu	B1_Rn	chr10	68615159	68615299	140	-	95.2639	0	96.2639	1.72166e-12
SINE	ID	ID4	chr8	62392845	62392912	67	-	95.2	0	96.2	7.37279e-13
LTR	ERVK	RLTR15	chr3	171009898	171010076	178	+	95.2	0	96.2	2.74811e-12
SINE	Alu	PB1D10	chr4	66177793	66177891	98	-	294.179	2.07	96.1495	1.80219e-12
SINE	B4	B4A	chr15	27619426	27619655	229	+	95	0	96	2.86145e-12
SINE	B4	RSINE1	chr8	19527232	19527351	119	+	94.8263	0	95.8263	1.46913e-12
SINE	B4	RSINE1	chr8	29325247	29325370	123	-	94.806	0	95.806	8.37938e-13
SINE	B2	B3A	chr5	16236123	16236315	192	-	94.7262	0	95.7262	1.25543e-12
LTR	ERVL-MaLR	ORR1D1	chr9	67834756	67835115	359	+	94.696	0	95.696	8.7803e-13
SINE	B4	ID_B1	chr10	76065494	76065567	73	+	160.608	0.689999	95.6261	1.57392e-11
SINE	Alu	B1F	chr17	82534611	82534751	140	-	94.6217	0	95.6217	1.43492e-12
SINE	B2	B3A	chr2	255312525	255312683	158	-	94.3333	0	95.3333	8.09884e-13
SINE	B4	B4	chr7	130804638	130804972	334	-	94.2406	0	95.2406	9.48743e-13
LTR	ERVL-MaLR	MTE2a	chr9	7267077	7267364	287	-	94.2233	0	95.2233	7.56278e-13
SINE	B2	B3	chr6	86395066	86395247	181	-	94.2097	0	95.2097	2.27922e-12
SINE	Alu	B1F	chr3	17457827	17457967	140	+	94	0	95	8.30728e-13
Low_complexity	Low_complexity	AT_rich	chr4	62895222	62895262	40	+	94	0	95	3.62077e-12
LTR	ERVL	RMER15	chr13	37166006	37166438	432	-	93.8577	0	94.8577	1.40563e-12
SINE	B4	B4A	chr13	108867467	108867674	207	+	93.7302	0	94.7302	1.32399e-12
SINE	B4	B4	chr8	20663437	20663532	95	-	171.519	0.828	94.3758	8.07576e-13
SINE	B2	B3A	chr3	135866521	135866637	116	-	93.1616	0	94.1616	3.28781e-12
SINE	B4	B4A	chr2	12235879	12236136	257	-	93.0979	0	94.0979	1.39757e-12
SINE	MIR	MIRb	chr8	53110859	53110980	121	-	92.8118	0	93.8118	7.9732e-13
SINE	B4	B4A	chr19	48617133	48617319	186	-	92	0	93	1.34401e-12
LTR	ERVL-MaLR	MLT1A0	chr8	46047277	46047601	324	+	92	0	93	7.37279e-13
SINE	B4	B4A	chr8	48177999	48178153	154	-	91.9482	0	92.9482	1.21034e-12
SINE	B4	RSINE1	chr17	52104812	52104972	160	+	91.8493	0	92.8493	2.69517e-12
SINE	B4	B4	chr16	6228095	6228268	173	+	91.5677	0	92.5677	1.32521e-12
LTR	ERVL-MaLR	MTC	chr2	113833568	113833948	380	+	91.4102	0	92.4102	8.44042e-13
SINE	B4	B4A	chr10	9284169	9284424	255	+	91.2463	0	92.2463	1.25882e-12
SINE	B4	B4A	chr3	62830526	62830787	261	+	91.1786	0	92.1786	9.21114e-13
LTR	ERVK	RLTR18B	chr17	59511389	59511586	197	-	91.0315	0	92.0315	7.77484e-13
SINE	B4	B4A	chr19	48693722	48693998	276	-	91	0	92	2.50656e-12
SINE	MIR	MIRb	chr3	17451020	17451229	209	-	90.6058	0	91.6058	6.35104e-12
SINE	B2	B3A	chr16	15766417	15766593	176	+	279.738	2.07	91.4456	1.60071e-12
LTR	ERVL-MaLR	ORR1D1	chr10	59644460	59644749	289	-	90.3978	0	91.3978	2.42541e-12
SINE	B2	B3	chr11	34872526	34872676	150	-	90.3051	0	91.3051	8.38609e-13
SINE	B4	B4	chr15	106836979	106837174	195	+	90.2067	0	91.2067	7.92084e-13
SINE	B4	B4A	chr3	62832406	62832647	241	+	90.1253	0	91.1253	9.21114e-13
SINE	B2	B3A	chr15	46438231	46438389	158	+	90.1088	0	91.1088	1.26878e-12
SINE	B4	B4A	chr14	66611981	66612183	202	-	90	0	91	2.18551e-12
SINE	Alu	B1F1	chr8	46031088	46031193	105	+	90	0	91	2.60446e-12
LTR	ERVK	RLTR12B	chr11	74004559	74004854	295	+	90	0	91	1.81376e-12
SINE	B4	ID_B1	chr5	151110587	151110792	205	-	278	2.07	90.8795	1.80219e-12
SINE	Alu	PB1D10	chr2	182757936	182758030	94	+	89.7754	0	90.7754	6.25976e-12
LTR	ERVL-MaLR	MTC	chr6	35928048	35928460	412	-	89.637	0	90.637	3.23392e-12
SINE	B2	B3A	chr16	37893430	37893628	198	-	89.2045	0	90.2045	5.09333e-13
SINE	B4	B4	chr14	66336865	66337036	171	-	89	0	90	1.24767e-12
SINE	Alu	B1_Rn	chr10	96448636	96448702	66	+	88.6628	0	89.6628	1.92075e-12
SINE	B2	B3A	chr10	68635388	68635569	181	-	88.3693	0	89.3693	1.93183e-12
SINE	Alu	B1F	chr17	82746424	82746540	116	+	88.2745	0	89.2745	4.42958e-12
SINE	B4	B4	chr3	153414177	153414462	285	+	88.2142	0	89.2142	1.20077e-12
SINE	B2	B3A	chr14	38811675	38811863	188	+	88.1912	0	89.1912	2.31883e-12
SINE	B4	B4A	chr11	31658896	31659107	211	+	88.0563	0	89.0563	1.45381e-12
SINE	B2	B2_Rat1	chr7	27732919	27733106	187	-	88	0	89	8.4843e-13
LTR	ERVL	MLT2C2	chr4	49447486	49447891	405	-	87.8433	0	88.8433	8.24522e-13
SINE	B4	RSINE1	chr3	9373848	9373883	35	-	87.695	0	88.695	2.10855e-12
SINE	Alu	B1_Mur4	chr8	57152729	57152830	101	-	87.5	0	88.5	3.13903e-12
LTR	ERVL-MaLR	ORR1E	chr9	7267580	7267959	379	-	87.5	0	88.5	7.56278e-13
LTR	ERVL	MER21B	chr6	138113805	138114179	374	-	87.4495	0	88.4495	1.33415e-12
SINE	B2	B3A	chr4	118121090	118121266	176	-	87.1692	0	88.1692	7.53224e-13
SINE	Alu	PB1D10	chr12	46691668	46691756	88	-	87.1123	0	88.1123	1.78268e-12
SINE	B2	B3	chr6	143328972	143329132	160	-	87.0606	0	88.0606	1.27556e-12
LTR	ERVL	MT2B	chr1	98792384	98792786	402	+	87.0449	0	88.0449	7.77293e-13
SINE	B2	B3	chr7	59011406	59011617	211	+	87	0	88	7.9732e-13
SINE	B2	B3A	chr5	14605034	14605232	198	+	87	0	88	1.29941e-12
SINE	B4	B4A	chr4	37267565	37267751	186	-	87	0	88	1.49717e-12
SINE	B2	B3	chr2	83619144	83619355	211	+	86.948	0	87.948	7.98824e-13
SINE	B2	B3	chr3	153460016	153460161	145	+	86.9021	0	87.9021	7.25988e-13
SINE	B4	B4A	chr1	177012082	177012368	286	-	96.3088	0.108947	87.7488	1.27229e-12
SINE	B4	B4A	chr10	13384401	13384654	253	+	86.6275	0	87.6275	1.12923e-12
DNA	TcMar-Tigger	Tigger7	chr19	23136492	23136682	190	+	86.5	0	87.5	3.0294e-12
SINE	B4	B4	chr1	98751025	98751133	108	-	86.3779	0	87.3779	4.46784e-12
SINE	B2	B3A	chr8	46043603	46043795	192	+	86.2753	0	87.2753	7.37279e-13
LINE	CR1	L3	chr15	58562730	58563021	291	-	86.2162	0	87.2162	1.60071e-12
SINE	B4	ID_B1	chr10	43685732	43685920	188	-	86.2	0	87.2	1.52178e-12
LTR	ERVL-MaLR	ORR1B2	chr6	40261794	40262134	340	+	86.2	0	87.2	8.10004e-13
SINE	B4	RSINE1	chr13	101243758	101243859	101	-	86.1688	0	87.1688	8.65691e-13
SINE	B2	B3A	chr16	77512953	77513120	167	-	86.1542	0	87.1542	5.91134e-12
SINE	B4	RSINE1	chr1	175534363	175534471	108	-	86.0575	0	87.0575	7.81482e-13
SINE	B4	B4A	chr1	21743996	21744262	266	+	86	0	87	8.30728e-13
SINE	B2	B3	chr5	155309372	155309575	203	-	86	0	87	2.26691e-12
SINE	B2	B3A	chr16	37869301	37869471	170	-	85.6192	0	86.6192	5.09333e-13
SINE	B4	RSINE1	chr6	132825013	132825173	160	-	85.5482	0	86.5482	8.11958e-13
SINE	B4	B4A	chr6	88728936	88729135	199	+	85.2118	0	86.2118	1.74403e-12
SINE	B4	B4A	chr11	73989826	73989981	155	-	85.126	0	86.126	1.35388e-12
SINE	Alu	B1_Rn	chr7	122196154	122196269	115	-	85.0088	0	86.0088	7.37279e-13
SINE	ID	ID_Rn1	chr6	1425051	1425146	95	+	85	0	86	1.28487e-12
SINE	ID	ID4	chr8	68926989	68927044	55	+	85	0	86	3.45356e-12
DNA	TcMar-Tigger	Tigger7	chr5	124986153	124986372	219	+	85	0	86	1.94674e-12
LTR	ERVK	RLTR21	chr19	49425108	49425331	223	+	84.5738	0	85.5738	9.10532e-13
LTR	ERVK	RLTR20A2	chr5	142759868	142759948	80	-	84.4524	0	85.4524	1.94674e-12
LINE	L2	L2	chr1	207339343	207339745	402	-	84.3333	0	85.3333	2.85693e-12
SINE	B2	B3	chr15	99984489	99984698	209	-	84.1633	0	85.1633	9.56362e-13
SINE	B4	B4A	chr18	36094702	36094979	277	+	259.991	2.07	85.0134	1.28589e-12
SINE	B2	B3	chr12	39176176	39176384	208	+	84	0	85	2.57451e-12
SINE	Alu	B1F	chr1	175537930	175538066	136	-	84	0	85	7.81482e-13
SINE	B4	B4	chr19	56536867	56537167	300	-	83.799	0	84.799	7.97437e-13
SINE	B4	RSINE1	chr8	79938633	79938929	296	-	83.7608	0	84.7608	1.42105e-12
SINE	B4	RSINE1	chr19	25065127	25065263	136	+	83.75	0	84.75	1.92773e-12
SINE	B2	B3A	chrX	48826541	48826696	155	+	108.753	0.295714	84.7046	1.14621e-12
SINE	B4	RSINE1	chr17	20925217	20925255	38	+	83.6772	0	84.6772	9.11554e-13
DNA	hAT-Charlie	URR1B	chr17	27629049	27629273	224	+	83.6005	0	84.6005	1.05508e-12
SINE	B2	B3	chr9	84054548	84054755	207	+	83.5115	0	84.5115	7.97564e-13
SINE	MIR	MIRb	chr8	34351704	34351788	84	+	83.5	0	84.5	1.77971e-12
DNA	TcMar-Tigger	MER2	chr4	164164408	164164717	309	+	83.25	0	84.25	7.37279e-13
SINE	B4	B4A	chr17	72623993	72624254	261	-	83.1147	0	84.1147	7.60647e-13
SINE	Alu	PB1D10	chr17	63106712	63106816	104	+	83.0189	0	84.0189	8.25328e-13
SINE	B4	B4A	chr5	167487583	167487770	187	-	83	0	84	1.55519e-12
SINE	Alu	B1F2	chr1	99082182	99082321	139	+	83	0	84	1.82898e-12
LTR	ERVL-MaLR	MTD	chr3	9363502	9363660	158	-	83	0	84	1.49151e-12
DNA	hAT-Charlie	MER58A	chr1	76462262	76462463	201	-	83	0	84	8.23462e-13
SINE	B2	B3A	chr3	112403809	112403972	163	+	82.9984	0	83.9984	2.41149e-12
SINE	B4	B4	chr10	85952753	85952967	214	+	82.8566	0	83.8566	7.37279e-13
SINE	Alu	B1F	chr2	111427495	111427626	131	+	82.5	0	83.5	9.99329e-13
SINE	Alu	B1_Rn	chr16	15692677	15692820	143	-	255.324	2.07	83.4932	1.58424e-12
SINE	B4	RSINE1	chr2	214878457	214878647	190	-	254.698	2.07	83.2893	1.4389e-12
SINE	B4	B4A	chr19	16856389	16856664	275	+	82.1077	0	83.1077	1.16646e-12
SINE	B4	B4A	chr2	218419291	218419601	310	+	282.794	2.41501	83.102	2.22551e-12
SINE	B4	B4A	chr15	41980999	41981269	270	+	82.0497	0	83.0497	9.07716e-13
LTR	ERVL-MaLR	ORR1E	chr5	125323868	125324207	339	-	81.9387	0	82.9387	1.42227e-12
SINE	B4	B4A	chr12	25858547	25858762	215	-	81.938	0	82.938	1.27919e-12
DNA	hAT-Charlie	URR1B	chr11	62352060	62352290	230	-	81.8863	0	82.8863	7.98061e-13
SINE	B2	B3	chr3	166352024	166352217	193	-	81.5705	0	82.5705	8.05178e-13
SINE	B4	B4A	chr8	34351054	34351350	296	-	81.3333	0	82.3333	1.77971e-12
LTR	ERVK	RLTR40	chr1	60871991	60872344	353	+	81.3055	0	82.3055	8.84982e-13
SINE	B4	B4A	chr5	150660093	150660348	255	+	81.3049	0	82.3049	8.72243e-13
SINE	B4	RSINE1	chr9	86246130	86246288	158	-	81.2935	0	82.2935	1.61189e-12
SINE	B4	ID_B1	chr3	75528721	75528936	215	+	81.25	0	82.25	3.40868e-12
LTR	ERVL	RMER15	chr18	36130656	36130763	107	+	81.222	0	82.222	3.17189e-12
SINE	B4	B4A	chr16	81400523	81400823	300	+	81.1955	0	82.1955	8.98769e-13
SINE	B4	B4A	chr5	59699961	59700205	244	-	81.0333	0	82.0333	1.38166e-12
LINE	L2	L2	chr5	124859321	124859658	337	+	81.0222	0	82.0222	8.78719e-13
LTR	ERVL-MaLR	MTD	chr8	29534348	29534525	177	-	81	0	82	1.38496e-12
SINE	B2	B3A	chr11	63843126	63843306	180	-	80.9997	0	81.9997	7.97309e-13
LTR	ERVL-MaLR	MTD	chr7	80597002	80597329	327	-	80.9352	0	81.9352	1.23366e-12
SINE	Alu	B1_Rn	chr5	96014437	96014575	138	+	80.7216	0	81.7216	1.75381e-12
SINE	B4	ID_B1	chr8	100581132	100581280	148	-	249.538	2.07	81.6085	8.09525e-13
SINE	B4	B4	chrX	47056604	47056874	270	-	80.5833	0	81.5833	8.10075e-13
SINE	B4	B4	chr16	49808913	49809209	296	+	80.5	0	81.5	8.75284e-13
SINE	B4	B4	chr3	17385613	17385854	241	+	80.5	0	81.5	1.28487e-12
SINE	B4	B4	chr4	174491372	174491555	183	-	80.4301	0	81.4301	5.06507e-13
LTR	ERVL-MaLR	MTC	chr13	36913164	36913272	108	+	80.0714	0	81.0714	7.37279e-13
LTR	ERVL-MaLR	ORR1A4	chr2	224683053	224683419	366	+	80.069	0	81.069	8.32398e-13
SINE	B2	B3A	chr2	61604916	61605106	190	+	80	0	81	8.78719e-13
SINE	Alu	PB1D7	chr1	15635256	15635354	98	-	80	0	81	1.75707e-12
SINE	B2	B2_Rat2	chrX	89401337	89401379	42	-	80	0	81	2.71037e-11
LINE	L2	L2	chr1	16677306	16677463	157	+	80	0	81	8.5567e-13
SINE	B4	B4A	chr1	221237515	221237753	238	+	79.5406	0	80.5406	3.04093e-12
SINE	Alu	B1F1	chr9	90726118	90726233	115	-	79.3819	0	80.3819	1.94674e-12
SINE	Alu	B1_Rn	chr4	57157442	57157587	145	-	79.344	0	80.344	7.99879e-13
SINE	B4	B4A	chr15	109665931	109666204	273	+	79.0141	0	80.0141	8.30728e-13
SINE	B4	B4A	chr10	8760619	8760876	257	+	79	0	80	1.19262e-12
SINE	B4	B4A	chr10	21659350	21659585	235	-	79	0	80	2.25627e-12
SINE	Alu	B1_Mur4	chr13	84062985	84063072	87	-	79	0	80	1.42391e-12
LTR	ERVL	RMER15	chr14	86384433	86384553	120	+	78.78	0	79.78	8.30728e-13
SINE	B4	B4	chr19	47399451	47399751	300	-	78.55	0	79.55	7.99153e-13
SINE	B4	B4A	chr14	104353598	104353877	279	+	78.5	0	79.5	1.4302e-12
SINE	B4	B4A	chr11	14042704	14042964	260	+	78.3333	0	79.3333	9.10532e-13
SINE	B4	RSINE1	chr13	37234948	37235093	145	+	78.3333	0	79.3333	3.00727e-12
SINE	B4	B4A	chr7	73552048	73552292	244	+	78.3219	0	79.3219	7.79937e-13
SINE	MIR	MIRb	chrX	27200519	27200687	168	+	78.2935	0	79.2935	1.21985e-12
SINE	B4	B4	chr5	14782116	14782326	210	-	78.2039	0	79.2039	2.11167e-12
LTR	ERVK	RLTR21	chr16	14725480	14725744	264	-	78.1398	0	79.1398	8.62301e-13
SINE	B2	B3A	chr3	30720593	30720746	153	-	78.1325	0	79.1325	3.06207e-12
SINE	Alu	B1_Rn	chr17	92378666	92378794	128	+	78	0	79	7.37279e-13
SINE	Alu	7SLRNA	chr18	69042941	69043068	127	-	78	0	79	1.49151e-12
SINE	B2	B3A	chr5	8620472	8620625	153	+	77.9873	0	78.9873	1.94647e-12
LTR	ERV1	RMER5	chr1	65261999	65262319	320	-	77.745	0	78.745	1.38735e-12
SINE	B2	B3	chr5	16174712	16174894	182	-	77.6394	0	78.6394	8.30728e-13
SINE	B4	B4	chr1	185207094	185207349	255	+	77.5479	0	78.5479	8.66251e-13
SINE	B2	B3	chr3	143755673	143755901	228	-	77.5111	0	78.5111	1.92154e-12
LTR	ERVL-MaLR	MLT1B	chr1	134203090	134203429	339	+	77.5	0	78.5	1.36167e-12
DNA	TcMar-Tigger	Tigger7	chr7	136801773	136801873	100	-	77.4645	0	78.4645	8.65707e-13
SINE	B4	RSINE1	chr14	82601786	82601934	148	+	77.3162	0	78.3162	1.41752e-12
SINE	B2	B3	chr9	20626793	20626954	161	+	77.0625	0	78.0625	1.25543e-12
SINE	MIR	MIR	chr5	144891574	144891771	197	+	77	0	78	8.03672e-13
SINE	B4	B4A	chr12	25694027	25694153	126	-	77	0	78	1.84852e-12
LTR	ERVL-MaLR	MTD	chr19	49302212	49302377	165	-	76.9745	0	77.9745	7.56644e-13
LTR	ERVL-MaLR	MTEa	chr16	77570008	77570277	269	+	76.6667	0	77.6667	7.98625e-13
SINE	B2	B3	chr17	11028362	11028551	189	-	76.5715	0	77.5715	2.87269e-12
SINE	B2	B3A	chr12	27195856	27196032	176	+	76.5274	0	77.5274	8.15185e-13
LTR	ERVL	MT2B	chr10	64594390	64594502	112	+	76.4344	0	77.4344	2.66353e-12
SINE	B4	B4A	chr13	36361476	36361701	225	+	76.4244	0	77.4244	1.4184e-12
SINE	B4	B4A	chr4	114343296	114343575	279	-	76.4115	0	77.4115	1.36256e-12
LTR	ERVK	RMER12	chr12	5194122	5194226	104	-	76.3655	0	77.3655	8.59838e-13
SINE	B4	ID_B1	chr15	14881592	14881783	191	-	76.3226	0	77.3226	8.17627e-13
SINE	B4	RSINE1	chr1	128654240	128654410	170	+	76.2475	0	77.2475	2.07042e-12
SINE	B2	B3A	chr5	19833969	19834186	217	-	99.0292	0.295714	77.2001	6.65189e-13
SINE	B4	ID_B1	chrX	48855044	48855266	222	+	76.1977	0	77.1977	1.27646e-12
LINE	L2	L2	chr3	37217927	37218095	168	+	76.1382	0	77.1382	2.26121e-12
SINE	Alu	B1_Mur2	chr7	127571437	127571570	133	-	76.0714	0	77.0714	1.77147e-12
SINE	B4	B4	chr4	90963330	90963604	274	-	76.0327	0	77.0327	8.98621e-13
SINE	B4	B4A	chr10	3042991	3043273	282	+	76.0154	0	77.0154	1.25905e-12
LTR	ERVL-MaLR	ORR1D2	chr19	25412572	25412876	304	+	76	0	77	9.57149e-13
SINE	B4	RSINE1	chr7	58772128	58772259	131	-	75.8145	0	76.8145	1.85301e-12
SINE	B4	B4A	chr12	32057521	32057768	247	+	75.636	0	76.636	2.2235e-12
SINE	B4	B4A	chr1	175543819	175544045	226	-	75.5658	0	76.5658	7.81482e-13
SINE	B2	B3A	chrX	40724027	40724201	174	+	75.5125	0	76.5125	8.48906e-13
SINE	B4	B4A	chr3	10066986	10067223	237	-	88.6094	0.1725	76.4259	1.48378e-12
SINE	ID	ID4_	chr1	16438107	16438148	41	+	75.3279	0	76.3279	2.22592e-12
SINE	B4	RSINE1	chr10	22146754	22146923	169	+	75.2823	0	76.2823	7.97418e-13
SINE	B4	B4	chr10	94611842	94612023	181	-	75.2118	0	76.2118	8.1842e-13
SINE	B4	B4A	chr2	224366705	224366814	109	+	75.1531	0	76.1531	7.52474e-13
SINE	B4	RSINE1	chr13	40065057	40065226	169	-	75.0286	0	76.0286	9.07763e-13
SINE	B4	RSINE1	chr3	148177901	148178070	169	-	75	0	76	8.09509e-13
LTR	ERVL-MaLR	ORR1D2	chr4	151040653	151041017	364	-	75	0	76	8.31634e-13
DNA	hAT-Charlie	MER5A1	chr10	21523135	21523283	148	-	75	0	76	1.14398e-12
SINE	B4	B4	chr1	156928644	156928905	261	-	74.9898	0	75.9898	9.5055e-13
LINE	L1	HAL1b	chr4	59577845	59578133	288	+	74.9167	0	75.9167	8.06338e-13
SINE	B2	B3	chr17	59449037	59449223	186	+	74.7392	0	75.7392	7.9732e-13
LTR	ERVL-MaLR	ORR1E	chr9	29522883	29523182	299	+	74.693	0	75.693	8.30728e-13
SINE	B4	B4A	chr17	64583895	64584166	271	-	94.125	0.25875	75.571	1.39466e-12
LINE	L1	HAL1	chrX	159831381	159831629	248	+	74.5	0	75.5	8.07576e-13
SINE	B4	B4	chr2	82490548	82490832	284	-	74.3559	0	75.3559	8.01825e-13
LTR	ERVL-MaLR	ORR1B2	chr16	15223528	15223880	352	-	74.2778	0	75.2778	1.29365e-12
SINE	Alu	PB1D7	chr12	25232973	25233090	117	+	74.2353	0	75.2353	8.4843e-13
SINE	B4	B4	chr3	12793983	12794128	145	+	74.2123	0	75.2123	8.87368e-13
SINE	Alu	B1_Mur1	chr8	19528217	19528351	134	-	74.1998	0	75.1998	1.46913e-12
rRNA	rRNA	SSU-rRNA_Hsa	chr2	468810	469265	455	+	2017.77	25.8928	75.0673	2.88583e-10
SINE	B4	B4A	chr4	152592281	152592505	224	-	74	0	75	2.22906e-12
SINE	Alu	B1F	chr2	111474240	111474364	124	-	74	0	75	1.22833e-12
SINE	B4	B4A	chr14	87893814	87894081	267	-	73.993	0	74.993	9.41974e-13
SINE	B4	B4	chr7	49297774	49298022	248	+	73.8467	0	74.8467	8.33232e-13
SINE	B4	RSINE1	chr3	30698544	30698680	136	-	73.8436	0	74.8436	1.14621e-12
SINE	B2	B3A	chr8	93673646	93673768	122	+	73.8155	0	74.8155	3.39156e-12
SINE	B4	B4A	chr13	37238441	37238595	154	+	73.791	0	74.791	2.78059e-12
LTR	ERVL-MaLR	ORR1E	chr13	46177019	46177375	356	-	73.5833	0	74.5833	8.20139e-13
SINE	B4	B4A	chr3	133814892	133815116	224	-	73.4057	0	74.4057	7.37279e-13
SINE	MIR	MIRb	chr10	102772289	102772436	147	+	73.2734	0	74.2734	6.567e-12
SINE	Alu	B1_Rn	chrX	12595798	12595941	143	-	73.2461	0	74.2461	4.35539e-12
LTR	ERVL-MaLR	MTC	chr15	12075161	12075522	361	+	73.2	0	74.2	8.01723e-13
SINE	B4	B4A	chr10	3039741	3039947	206	+	73.1689	0	74.1689	6.37401e-12
SINE	B2	B3A	chr16	37898104	37898257	153	-	73.166	0	74.166	5.09333e-13
SINE	B2	B3	chr2	83618573	83618773	200	-	73.1126	0	74.1126	7.98824e-13
SINE	B4	RSINE1	chr12	12381288	12381417	129	-	73.0971	0	74.0971	1.14603e-12
SINE	B4	B4A	chr13	74734755	74734929	174	+	73	0	74	8.99795e-13
SINE	MIR	MIRb	chr1	149034635	149034768	133	+	73	0	74	1.13869e-12
SINE	B4	B4	chr10	86770403	86770662	259	+	72.9129	0	73.9129	8.09141e-13
SINE	B4	B4	chr4	182678282	182678452	170	+	72.8164	0	73.8164	1.74631e-12
SINE	B4	B4A	chr13	36742643	36742888	245	+	72.7811	0	73.7811	1.17484e-12
SINE	B4	B4A	chr12	41271254	41271520	266	-	72.7794	0	73.7794	8.43582e-13
SINE	B4	B4	chr12	25939248	25939436	188	-	72.5811	0	73.5811	8.19705e-13
SINE	B4	B4A	chr11	55905229	55905431	202	-	72.5704	0	73.5704	8.92913e-13
SINE	B4	B4A	chr12	26343082	26343361	279	-	72.5204	0	73.5204	9.27215e-13
SINE	B2	B3	chr2	144524626	144524809	183	-	72.5161	0	73.5161	8.27889e-13
SINE	Alu	B1F	chr12	12462207	12462345	138	-	72.5	0	73.5	1.41317e-12
SINE	B4	ID_B1	chr4	160647769	160647991	222	+	72.4099	0	73.4099	1.76304e-12
SINE	ID	ID4	chr3	159431913	159431994	81	+	72.1667	0	73.1667	7.98282e-13
SINE	B2	B3	chr6	88957876	88957946	70	+	72.077	0	73.077	2.00701e-12
SINE	Alu	B1F	chr4	59577485	59577602	117	+	72.044	0	73.044	8.06338e-13
SINE	MIR	MIR	chr13	36823584	36823764	180	+	72	0	73	9.50662e-13
SINE	B4	ID_B1	chr12	25309392	25309513	121	-	72	0	73	1.38244e-12
SINE	Alu	B1F	chr10	9662811	9662915	104	+	72	0	73	1.49151e-12
DNA	hAT-Blackjack	MER63A	chr19	48515926	48516141	215	-	72	0	73	8.75142e-13
DNA	hAT-Charlie	RCHARR1	chr1	250863962	250864141	179	+	72	0	73	7.98553e-13
SINE	Alu	PB1D10	chr4	149381033	149381133	100	+	71.9828	0	72.9828	7.82109e-13
SINE	Alu	B1_Mur3	chr18	35972981	35973127	146	+	71.966	0	72.966	1.23138e-11
SINE	B4	B4A	chr8	54136412	54136654	242	-	71.6496	0	72.6496	8.16674e-13
SINE	B4	RSINE1	chr8	19749433	19749585	152	+	71.6442	0	72.6442	8.30728e-13
SINE	B4	B4	chr13	36953747	36953884	137	+	71.5106	0	72.5106	1.27262e-12
SINE	Alu	PB1D7	chr10	46835688	46835747	59	-	71.5	0	72.5	3.00638e-12
SINE	B2	B3A	chr7	67366766	67366953	187	-	71.3929	0	72.3929	1.51358e-12
SINE	B2	B3	chr20	1562379	1562532	153	+	101.255	0.414	72.3161	1.62595e-12
SINE	B4	B4A	chr1	45054619	45054905	286	-	228.583	2.17894	72.2199	7.9732e-13
SINE	B4	B4A	chr7	134933210	134933420	210	+	71.1862	0	72.1862	1.23669e-12
LTR	ERVL-MaLR	MLT1B	chr18	61162692	61162920	228	-	71.1844	0	72.1844	8.24629e-13
SINE	B4	B4A	chr17	71945070	71945284	214	+	71	0	72	1.34944e-12
SINE	B2	B3	chr5	167446647	167446819	172	-	71	0	72	7.98608e-13
LINE	L2	L2	chr7	63129781	63130001	220	-	71	0	72	8.11574e-13
DNA	TcMar-Tigger	Tigger5	chr1	175548059	175548249	190	+	71	0	72	7.81482e-13
SINE	B4	B4A	chr1	4162857	4163159	302	+	70.95	0	71.95	9.42733e-13
SINE	B4	B4A	chr6	35927879	35928048	169	-	70.9124	0	71.9124	3.23392e-12
SINE	B4	B4A	chr7	127656920	127657195	275	-	70.85	0	71.85	1.36363e-12
SINE	MIR	MIR	chr10	22067759	22067879	120	-	70.8191	0	71.8191	1.08341e-12
SINE	B4	B4	chr8	127389446	127389707	261	-	70.8159	0	71.8159	7.76118e-13
SINE	B4	B4A	chr11	36284564	36284829	265	+	70.7334	0	71.7334	9.31005e-13
SINE	B4	B4	chr10	21525655	21525733	78	+	70.6786	0	71.6786	1.14398e-12
SINE	B4	B4A	chr1	153843780	153844029	249	-	70.6766	0	71.6766	8.42365e-13
LTR	ERVL-MaLR	MTEa	chr5	95535989	95536320	331	+	70.6667	0	71.6667	7.37279e-13
SINE	B4	RSINE1	chr11	13679147	13679305	158	+	70.5737	0	71.5737	2.25226e-12
SINE	B4	B4	chr7	114855486	114855571	85	+	70.5	0	71.5	8.45177e-13
SINE	B2	B3A	chr11	45700236	45700371	135	-	218.034	2.07	71.3466	1.89791e-12
SINE	ID	ID_Rn1	chr14	85215264	85215360	96	+	513.319	6.21	71.3341	8.64446e-13
SINE	B4	B4A	chr15	93101057	93101294	237	+	70.2189	0	71.2189	9.51104e-13
snRNA	snRNA	U6	chr2	180815745	180815819	74	-	70.1667	0	71.1667	1.76505e-12
SINE	Alu	B1_Rn	chr6	136407325	136407464	139	-	70.1666	0	71.1666	1.38606e-12
SINE	B4	B4A	chr5	20527681	20527955	274	+	70.1	0	71.1	8.08046e-13
SINE	B2	B3A	chr14	62884235	62884373	138	+	70.0606	0	71.0606	1.94674e-12
SINE	B4	B4A	chr2	113985981	113986157	176	-	70.0332	0	71.0332	1.03691e-12
SINE	B4	B4A	chr4	111484260	111484462	202	+	70.0211	0	71.0211	2.26427e-12
SINE	B4	B4A	chr7	103432967	103433253	286	+	70.0172	0	71.0172	1.29941e-12
SINE	B4	RSINE1	chr2	224220011	224220163	152	-	70.0047	0	71.0047	1.46684e-11
LTR	ERVL-MaLR	MLT1A1	chr10	20197935	20198019	84	-	70	0	71	1.60071e-12
LTR	ERVL-MaLR	ORR1D1	chr13	60658944	60659196	252	+	69.8582	0	70.8582	7.99771e-13
SINE	B2	B3A	chr2	38112121	38112212	91	+	69.6327	0	70.6327	2.42429e-12
DNA	hAT	MER99	chr4	75690690	75691026	336	-	69.6098	0	70.6098	9.81139e-13
SINE	B4	B4A	chr3	154825283	154825528	245	+	69.5573	0	70.5573	8.17876e-13
SINE	B4	B4A	chr19	15196911	15197158	247	+	69.4807	0	70.4807	7.97422e-13
SINE	B2	B3	chr6	113175484	113175639	155	-	69.4556	0	70.4556	7.43002e-13
SINE	B2	B3A	chr3	111829932	111830102	170	-	76.6606	0.1035	70.3766	1.65454e-12
SINE	Alu	B1_Mur1	chr1	210153329	210153481	152	+	69.3609	0	70.3609	2.54811e-12
SINE	B4	B4A	chr9	32550220	32550488	268	+	69.3527	0	70.3527	9.3704e-13
SINE	B2	B3	chr11	13740157	13740323	166	+	69.3327	0	70.3327	3.585e-12
SINE	B4	B4A	chr9	20585119	20585303	184	-	69.2992	0	70.2992	7.82109e-13
LINE	L2	L2	chr7	27778627	27778942	315	-	69.25	0	70.25	1.18721e-12
LTR	ERVK	RMER12	chr11	13665259	13665601	342	+	505.161	6.21	70.2026	1.51194e-12
SINE	B2	B3A	chr17	33080968	33081054	86	+	69.1553	0	70.1553	9.46125e-13
LINE	L2	L2	chr5	125376889	125377084	195	-	69.1198	0	70.1198	1.17053e-12
SINE	B4	B4A	chr4	151786839	151787101	262	+	69.0864	0	70.0864	1.34832e-12
SINE	B4	B4	chr7	1749860	1750048	188	-	69.0589	0	70.0589	8.08225e-13
SINE	B4	B4A	chr3	116281171	116281441	270	+	69.0271	0	70.0271	1.61013e-12
LTR	ERVK	RNLTR15A	chr12	25393843	25394035	192	-	503.804	6.21	70.0144	2.50978e-12
SINE	B4	B4	chr1	209220529	209220821	292	-	69	0	70	7.9844e-13
SINE	B4	B4A	chr19	12088541	12088798	257	+	69	0	70	1.40251e-12
SINE	B4	ID_B1	chr13	12367349	12367522	173	-	69	0	70	9.81139e-13
SINE	B4	B4A	chr14	36025226	36025329	103	+	69	0	70	1.53725e-12
SINE	ID	ID_Rn2	chr1	180462076	180462172	96	-	69	0	70	8.27385e-13
SINE	B4	RSINE1	chr10	86270335	86270464	129	+	68.9948	0	69.9948	8.4843e-13
SINE	Alu	B1F	chr10	21597256	21597366	65	-	549.859	6.89999	69.729	4.68709e-12
SINE	Alu	B1_Mur3	chr10	68460463	68460595	132	+	68.709	0	69.709	9.15114e-13
SINE	MIR	MIR	chr1	212896028	212896266	238	-	68.5	0	69.5	7.90912e-13
SINE	B2	B3A	chr1	153580883	153581068	185	-	68.4617	0	69.4617	1.99989e-12
SINE	B4	B4A	chr1	134252841	134253031	190	+	68.4197	0	69.4197	1.18796e-12
LTR	ERVL	MLT2D	chr1	227137197	227137430	233	-	68.3936	0	69.3936	2.20245e-12
SINE	B4	B4A	chr8	107080328	107080607	279	+	68.3697	0	69.3697	1.43175e-12
SINE	B2	B3A	chr10	56575262	56575425	163	+	68.3236	0	69.3236	1.36212e-12
SINE	B2	B3A	chr16	37889586	37889765	179	-	68.2817	0	69.2817	5.09333e-13
SINE	B2	B3	chr8	71714767	71714966	199	+	68.1156	0	69.1156	1.2135e-12
SINE	MIR	MIRb	chr19	14549506	14549719	213	+	68.0526	0	69.0526	2.68733e-12
SINE	B4	B4	chr2	255000424	255000575	151	-	68.0017	0	69.0017	2.96057e-12
tRNA	tRNA	tRNA-Ser-TCG	chr17	50134314	50134396	82	+	68	0	69	1.23669e-12
SINE	B2	B3	chr12	5009471	5009682	211	-	68	0	69	2.19294e-12
SINE	B4	B4A	chr3	153322003	153322182	179	+	68	0	69	7.98947e-13
LTR	ERVL-MaLR	ORR1E	chr5	75389029	75389333	304	-	68	0	69	7.37279e-13
LTR	ERVL-MaLR	MTEb	chr14	63578781	63579077	296	-	68	0	69	8.2137e-13
LINE	L2	L2	chr13	108867107	108867267	160	+	68	0	69	1.32399e-12
DNA	TcMar-Tigger	MER2	chr1	175712065	175712285	220	-	68	0	69	1.72421e-12
SINE	B4	B4A	chr10	5727633	5727917	284	-	67.9922	0	68.9922	1.445e-12
SINE	B4	B4A	chr8	55105482	55105735	253	-	67.9339	0	68.9339	7.91464e-13
SINE	B2	B3A	chrX	159830924	159831080	156	+	78.1197	0.147857	68.9282	8.07576e-13
SINE	B4	B4	chr5	161375906	161376183	277	+	89.8635	0.318461	68.9163	7.56278e-13
SINE	B2	B3	chr2	189761947	189762128	181	-	282.895	3.13636	68.634	8.03096e-13
SINE	B4	B4	chr1	94929761	94929842	81	-	67.5	0	68.5	7.82109e-13
DNA	TcMar-Tigger	Tigger5	chr1	227118240	227118453	213	-	67.5	0	68.5	1.86397e-12
SINE	B4	B4A	chr3	49620597	49620852	255	-	67.3914	0	68.3914	9.41974e-13
SINE	Alu	B1_Mur3	chr7	117598695	117598814	119	-	67.2162	0	68.2162	1.51186e-12
DNA	hAT-Blackjack	BLACKJACK	chr7	74932403	74932658	255	+	67.0637	0	68.0637	1.39915e-12
SINE	B2	B3A	chr12	25999796	25999961	165	-	85.3005	0.268179	68.0507	7.9732e-13
SINE	Alu	B1_Mur2	chr7	129357463	129357582	119	+	67.0308	0	68.0308	2.50933e-12
SINE	B4	RSINE1	chr8	47672101	47672247	146	+	67	0	68	1.02734e-12
LTR	ERVL-MaLR	ORR1D2	chr8	6722708	6722978	270	+	67	0	68	1.32521e-12
SINE	B4	RSINE1	chr6	53190748	53190879	131	+	66.9331	0	67.9331	1.58218e-12
LTR	ERV1	MER4B-int	chr12	5193751	5193803	52	-	94.9216	0.414	67.8371	8.59838e-13
SINE	B4	B4A	chr3	4108739	4108906	167	+	66.6818	0	67.6818	1.32713e-12
SINE	B4	B4A	chr1	4148233	4148439	206	+	66.5787	0	67.5787	1.70016e-12
SINE	B4	RSINE1	chr13	11863217	11863384	167	-	66.5641	0	67.5641	1.63056e-12
SINE	B4	B4A	chr11	67896365	67896655	290	+	66.5567	0	67.5567	7.9845e-13
SINE	Alu	PB1D10	chr1	227115006	227115102	96	-	66.5	0	67.5	1.86397e-12
SINE	B4	B4A	chr3	166321235	166321502	267	-	66.386	0	67.386	9.81139e-13
SINE	B4	RSINE1	chr2	82485831	82485991	160	-	66.3135	0	67.3135	1.38063e-12
SINE	B2	B3A	chr6	88734209	88734314	105	+	66.2505	0	67.2505	2.99745e-12
SINE	B4	B4A	chr4	3086272	3086507	235	+	66.25	0	67.25	7.35725e-13
SINE	B4	B4A	chr1	78302670	78302920	250	-	66.1816	0	67.1816	1.50849e-12
SINE	B4	B4A	chr1	241437248	241437449	201	+	66.1111	0	67.1111	9.35407e-13
SINE	B4	B4A	chr2	176742919	176743178	259	-	66.0894	0	67.0894	8.27848e-13
SINE	B4	B4	chr1	2479401	2479607	206	-	66	0	67	1.37558e-12
SINE	Alu	PB1D10	chr3	17457710	17457810	100	+	66	0	67	8.30728e-13
LTR	ERVL	ERVL-E	chr5	95689264	95689432	168	+	66	0	67	1.6092e-12
DNA	TcMar-Tigger	MER2	chr5	144879740	144879982	242	+	66	0	67	9.81139e-13
DNA	TcMar-Tigger	MER2B	chr7	48996877	48996988	111	-	66	0	67	1.35137e-12
DNA	hAT-Charlie	RCHARR1	chr10	21543322	21543770	448	+	204.677	2.07	66.9958	1.90029e-12
SINE	B4	B4A	chr12	27173233	27173513	280	+	65.9235	0	66.9235	8.534e-13
SINE	B4	RSINE1	chr17	84905649	84905823	174	+	65.8069	0	66.8069	8.28556e-13
SINE	B4	B4A	chr13	91179653	91179926	273	+	65.7833	0	66.7833	9.61372e-13
SINE	B4	B4A	chr18	8166864	8167152	288	+	204	2.07	66.7752	3.20241e-12
LTR	ERVL-MaLR	MLT1C	chr1	8808243	8808559	316	-	65.7407	0	66.7407	1.28042e-12
SINE	B4	B4A	chr5	79303062	79303331	269	+	65.6679	0	66.6679	5.29861e-13
SINE	B4	RSINE1	chr1	186840413	186840587	174	-	65.6638	0	66.6638	8.10332e-13
SINE	B4	B4A	chr6	4673793	4673910	117	+	65.5608	0	66.5608	2.10855e-12
DNA	TcMar-Tigger	Tigger7	chr19	23136692	23136891	199	+	65.5478	0	66.5478	3.0294e-12
LTR	ERVK	RMER12	chr1	183037005	183037249	244	+	65.5	0	66.5	1.59805e-12
SINE	B2	B3A	chr2	111441694	111441853	159	+	65.499	0	66.499	4.68192e-12
SINE	Alu	B1_Rn	chr17	21734974	21735100	126	+	65.4575	0	66.4575	7.99101e-13
SINE	B2	B3A	chr12	25624108	25624251	143	+	225.858	2.41501	66.4297	1.93197e-12
SINE	B4	B4A	chr8	118521828	118522058	230	-	65.3986	0	66.3986	1.75225e-12
SINE	B4	RSINE1	chr12	12177961	12178109	148	-	65.3821	0	66.3821	1.27197e-12
SINE	B2	B3A	chr7	127383510	127383681	171	+	65.3656	0	66.3656	1.51194e-12
LTR	ERVK	RLTR21	chr16	14725784	14725971	187	-	65.3249	0	66.3249	8.62301e-13
SINE	MIR	MIR	chr7	114865288	114865503	215	-	65.2955	0	66.2955	7.37279e-13
SINE	B4	RSINE1	chr12	12158996	12159137	141	-	65.192	0	66.192	8.4843e-13
LTR	ERVL-MaLR	ORR1A2	chr18	2013730	2014048	318	+	65.1313	0	66.1313	9.775e-13
SINE	B4	B4A	chr18	29072224	29072513	289	+	65.1244	0	66.1244	1.03892e-12
SINE	B4	B4A	chr10	9390471	9390726	255	+	65.1097	0	66.1097	6.02789e-12
SINE	B4	RSINE1	chr11	74018823	74018972	149	-	65.0839	0	66.0839	8.2628e-13
SINE	B4	RSINE1	chr2	83618811	83618944	133	+	65.0449	0	66.0449	7.98824e-13
SINE	B4	B4	chr16	15100453	15100551	98	+	65.0444	0	66.0444	1.38244e-12
SINE	B4	B4A	chr11	4701436	4701691	255	-	65	0	66	1.38244e-12
SINE	ID	BC1_Rn	chr8	61528149	61528240	91	+	65	0	66	2.37589e-12
SINE	Alu	PB1D10	chr15	109584117	109584176	59	-	65	0	66	2.95933e-12
SINE	B2	B3	chr9	61762288	61762480	192	+	74.6566	0.147857	65.9112	8.8649e-13
SINE	B4	B4A	chr10	9639316	9639540	224	+	64.899	0	65.899	1.73441e-12
SINE	B4	B4A	chr10	9291527	9291781	254	+	64.8686	0	65.8686	1.4314e-12
SINE	B2	B2_Rat4	chr11	45574091	45574275	184	-	64.8289	0	65.8289	1.14621e-12
SINE	B4	B4A	chr7	80527223	80527485	262	-	64.5946	0	65.5946	8.04466e-13
SINE	MIR	MIRb	chr13	84048728	84048889	161	+	64.5	0	65.5	2.0318e-12
LTR	ERVL-MaLR	MTEa	chr18	17519986	17520210	224	+	64.5	0	65.5	1.32521e-12
LTR	ERVL-MaLR	MTD	chr16	85105715	85106112	397	+	199.743	2.07	65.3886	1.41813e-12
SINE	B4	B4A	chr9	67952867	67953103	236	+	64.3436	0	65.3436	9.43444e-13
SINE	B4	B4A	chr8	27503515	27503780	265	-	64.3294	0	65.3294	1.53172e-12
DNA	hAT-Charlie	MER20	chr10	9696880	9697032	152	-	64.3041	0	65.3041	8.4843e-13
SINE	B2	B3	chr1	217726784	217726931	147	+	64.2842	0	65.2842	8.07983e-13
LTR	ERVL-MaLR	MTE2b	chr4	34139783	34139987	204	-	64.2222	0	65.2222	8.54618e-13
SINE	B4	B4A	chr8	29589990	29590207	217	+	64.1	0	65.1	2.0318e-12
SINE	B4	ID_B1	chr8	48718258	48718466	208	+	64.0917	0	65.0917	1.10149e-12
SINE	B2	B3A	chr6	135321611	135321706	95	-	64.058	0	65.058	9.1392e-13
DNA	hAT-Charlie	URR1A	chr2	30488627	30488843	216	+	64.0464	0	65.0464	1.42288e-12
SINE	B4	B4A	chr5	76843792	76844076	284	+	131.365	1.035	65.0442	1.96155e-12
SINE	Alu	B1_Mur1	chr7	32109392	32109521	129	+	64.027	0	65.027	1.15968e-12
SINE	B4	B4A	chr3	119241716	119241985	269	-	64	0	65	1.32521e-12
SINE	B2	B3A	chr14	66490302	66490508	206	+	64	0	65	1.4184e-12
SINE	B2	B3A	chr1	44956250	44956446	196	-	64	0	65	9.81139e-13
SINE	B4	ID_B1	chr1	209214068	209214212	144	+	64	0	65	7.9844e-13
LTR	ERVL-MaLR	ORR1B1	chr8	10200468	10200554	86	+	64	0	65	1.84761e-12
LINE	L2	L2	chr1	185092325	185092589	264	-	64	0	65	1.08298e-12
DNA	hAT-Tip100	MER115	chr4	130774709	130774900	191	+	64	0	65	8.07429e-13
SINE	B4	RSINE1	chr1	231560015	231560176	161	+	63.8673	0	64.8673	1.41108e-12
LTR	ERVK	RNLTR15A	chr12	25393773	25393800	27	-	63.7917	0	64.7917	2.50978e-12
SINE	B4	ID_B1	chr10	21508367	21508488	121	-	63.75	0	64.75	4.07625e-12
SINE	B2	B3	chr13	97988327	97988530	203	+	63.6922	0	64.6922	8.0963e-13
SINE	B2	B3	chr7	117230876	117231053	177	-	63.5	0	64.5	2.20026e-12
SINE	B2	B3A	chr5	60700491	60700649	158	+	63.4524	0	64.4524	1.89858e-12
SINE	B4	B4	chr4	15456842	15457027	185	+	63.4323	0	64.4323	1.24421e-12
SINE	B2	B3	chr3	4263280	4263445	165	+	63.1795	0	64.1795	1.62618e-12
SINE	B4	B4	chr11	5292098	5292312	214	-	196	2.07	64.1694	7.9732e-13
SINE	B4	B4	chrX	63279532	63279732	200	-	63.1019	0	64.1019	8.40021e-13
SINE	B4	B4A	chr8	82163163	82163466	303	+	63	0	64	8.10004e-13
SINE	B4	B4A	chr17	68599668	68599940	272	-	63	0	64	7.81487e-13
SINE	B4	B4	chr10	5662453	5662611	158	-	63	0	64	7.36461e-13
SINE	ID	BC1_Rn	chr3	92461210	92461314	104	+	63	0	64	8.50745e-13
LTR	ERVL-MaLR	MTEa	chr14	66610303	66610560	257	-	63	0	64	2.18551e-12
LTR	ERVL-MaLR	ORR1D1	chr1	180819205	180819426	221	+	63	0	64	9.24336e-13
LTR	ERVL-MaLR	MTEb	chr11	69707735	69707858	123	+	63	0	64	1.86643e-12
LTR	ERVK	RLTR20D	chr8	10249768	10250094	326	+	238.487	2.75999	63.6935	8.16656e-13
SINE	B2	B3	chr10	28798507	28798716	209	-	62.6526	0	63.6526	1.22782e-12
SINE	Alu	B1_Mur3	chr11	68617038	68617189	151	-	193.996	2.07	63.5166	1.2386e-12
SINE	B2	B3A	chr6	88728228	88728439	211	-	62.5	0	63.5	1.74403e-12
SINE	B4	B4A	chr10	67360945	67361173	228	-	62.3808	0	63.3808	8.00259e-13
SINE	B2	B3	chr1	80339332	80339522	190	+	62.377	0	63.377	7.35913e-13
SINE	B4	B4A	chr15	21220916	21221163	247	-	62.3443	0	63.3443	1.21439e-12
SINE	B4	B4A	chr1	38366023	38366217	194	-	62.3333	0	63.3333	8.71514e-13
DNA	hAT-Charlie	MER5B	chr20	31449559	31449685	126	-	62.3333	0	63.3333	9.76049e-13
SINE	B2	B3A	chr3	118647783	118647959	176	-	343.093	4.43572	63.3022	8.10129e-12
SINE	B4	B4	chr16	77401818	77402097	279	-	62.1516	0	63.1516	8.31631e-13
SINE	Alu	PB1D10	chr3	118084988	118085102	114	-	62.1408	0	63.1408	8.2137e-13
SINE	B2	B3	chr7	63151296	63151479	183	-	62.1254	0	63.1254	8.16656e-13
SINE	B4	B4	chr4	67656428	67656679	251	-	62.0322	0	63.0322	8.54836e-13
LTR	ERVL-MaLR	MLT1D	chr4	111417822	111417914	92	-	62.0112	0	63.0112	1.60071e-12
SINE	B4	ID_B1	chr19	35050681	35050877	196	+	62	0	63	7.5234e-13
SINE	B2	B3A	chr2	254685343	254685522	179	-	62	0	63	1.49151e-12
DNA	hAT-Charlie	MER20	chr2	212187134	212187258	124	+	61.9352	0	62.9352	1.28487e-12
LTR	ERVL	MLT2D	chr9	54367002	54367281	279	-	61.918	0	62.918	8.33435e-13
SINE	B4	B4	chr13	40291709	40291828	119	+	61.9051	0	62.9051	7.93081e-13
SINE	B4	B4	chr8	80397008	80397135	127	+	61.9005	0	62.9005	2.3376e-12
SINE	B4	B4A	chr15	14955168	14955360	192	+	61.814	0	62.814	1.19365e-12
SINE	B4	B4	chr5	96431728	96431883	155	+	61.7633	0	62.7633	1.18874e-12
Other	Other	RMER1A	chr16	77315075	77315164	89	+	61.5227	0	62.5227	1.53326e-12
LTR	ERVK	RNLTR2a	chr9	13556287	13556403	116	-	61.5	0	62.5	2.48635e-11
SINE	B4	ID_B1	chr8	112244059	112244138	79	+	61.395	0	62.395	8.04536e-13
SINE	MIR	MIR	chr3	157861250	157861457	207	-	61.3333	0	62.3333	1.1564e-12
SINE	B4	RSINE1	chr19	47556653	47556838	185	-	69.9081	0.138	62.3094	1.38496e-12
SINE	Alu	PB1D10	chr10	82737461	82737576	115	+	61.2876	0	62.2876	7.1045e-12
SINE	B2	B3A	chr13	36593322	36593458	136	+	61.2719	0	62.2719	2.12958e-12
SINE	B4	B4	chr18	8142525	8142753	228	+	61.1824	0	62.1824	1.88989e-12
SINE	B2	B3A	chr17	82300097	82300257	160	-	61.0783	0	62.0783	1.33431e-12
SINE	B4	B4A	chr10	9691526	9691669	143	+	61.0578	0	62.0578	8.4843e-13
DNA	hAT-Charlie	MER112	chr5	76827992	76828142	150	+	189.5	2.07	62.0521	3.49621e-12
SINE	B4	B4	chr12	25939561	25939667	106	-	61.0227	0	62.0227	8.19705e-13
SINE	B2	B3	chr17	71724499	71724603	104	+	61.0208	0	62.0208	7.82109e-13
SINE	B4	B4A	chr12	40525652	40525912	260	-	61.0141	0	62.0141	7.67251e-13
SINE	B4	B4A	chr2	58057560	58057845	285	+	61	0	62	1.46143e-12
SINE	B4	ID_B1	chr10	51333566	51333793	227	+	61	0	62	9.43006e-13
LTR	ERVL-MaLR	MLT1C	chr3	53524991	53525292	301	-	61	0	62	6.92102e-13
DNA	hAT-Charlie	MER3	chr8	108788336	108788519	183	+	61	0	62	1.65858e-12
SINE	B2	B3A	chr16	37878110	37878248	138	-	60.9907	0	61.9907	5.09333e-13
SINE	B4	B4	chr4	158928303	158928471	168	+	60.9777	0	61.9777	7.9732e-13
LTR	ERVK	RNLTR15A	chr8	22489895	22490027	132	+	60.8334	0	61.8334	2.33221e-12
SINE	B4	ID_B1	chr2	202782726	202782915	189	-	60.8269	0	61.8269	8.37938e-13
LTR	ERVK	RLTR21	chr20	19648172	19648336	164	-	71.4729	0.1725	61.8106	3.56278e-12
LTR	ERVL-MaLR	ORR1A_Rn	chr7	58739251	58739542	291	-	60.7014	0	61.7014	2.30899e-12
SINE	Alu	B1_Mur2	chr1	179727669	179727792	123	-	60.574	0	61.574	1.33298e-12
SINE	B2	B3	chr10	1513375	1513582	207	-	60.518	0	61.518	8.29514e-13
SINE	B4	B4A	chr1	175647177	175647372	195	+	60.4814	0	61.4814	1.41965e-12
SINE	B4	B4	chr4	114233056	114233289	233	-	60.4784	0	61.4784	8.13494e-13
SINE	ID	BC1_Rn	chr9	90332267	90332412	145	-	60.367	0	61.367	8.6252e-13
SINE	B4	B4A	chr13	36410958	36411244	286	+	60.2807	0	61.2807	1.26684e-12
LTR	ERVL-MaLR	MLT1A1	chr6	15069554	15069702	148	-	187.1	2.07	61.2704	3.23015e-12
SINE	B4	B4A	chr1	41066676	41066911	235	-	60.2043	0	61.2043	8.28556e-13
DNA	TcMar-Tigger	Tigger5	chr10	64594168	64594359	191	-	60.1667	0	61.1667	2.66353e-12
SINE	B4	B4A	chr4	5197654	5197921	267	-	60.08	0	61.08	8.6691e-13
SINE	MIR	MIR	chr7	80569281	80569442	161	-	60.0671	0	61.0671	8.24128e-13
SINE	B4	RSINE1	chr20	47057167	47057299	132	+	60.0506	0	61.0506	8.70017e-13
SINE	Alu	B1_Mur1	chr16	54381919	54382007	88	+	60.0273	0	61.0273	4.32231e-12
SINE	Alu	B1_Mur1	chr12	26094230	26094375	145	-	60.0183	0	61.0183	9.44049e-13
LTR	ERVK	RMER3C	chr6	144524477	144524612	135	+	60.0159	0	61.0159	1.48076e-12
SINE	B4	B4A	chr16	15213359	15213619	260	-	60	0	61	9.42145e-13
SINE	B4	ID_B1	chr15	76502669	76502885	216	+	60	0	61	1.39757e-12
SINE	ID	ID_Rn2	chr6	15070152	15070248	96	-	60	0	61	3.23015e-12
SINE	B4	B4	chr8	28920008	28920087	79	+	60	0	61	1.76005e-12
LINE	L2	L2	chr19	48514800	48514990	190	-	60	0	61	8.75142e-13
SINE	B2	B3A	chr14	100732379	100732579	200	-	59.969	0	60.969	1.84708e-12
SINE	B4	RSINE1	chr17	11028688	11028798	110	-	59.9363	0	60.9363	2.87269e-12
SINE	B4	B4A	chr5	144903763	144904005	242	+	59.9209	0	60.9209	7.64087e-13
SINE	B4	RSINE1	chr2	57825278	57825435	157	-	59.8814	0	60.8814	8.0811e-13
LTR	ERVL	RMER15	chr18	58562967	58563200	233	-	59.8814	0	60.8814	1.28589e-12
SINE	Alu	B1_Mur2	chr3	11321576	11321694	118	-	59.8423	0	60.8423	1.79304e-12
SINE	B4	B4A	chr20	46999845	47000085	240	+	59.786	0	60.786	8.11017e-13
SINE	B4	B4A	chr9	54334989	54335260	271	-	59.7825	0	60.7825	2.12842e-12
SINE	B4	RSINE1	chr3	61569057	61569162	105	-	59.7757	0	60.7757	2.35949e-12
SINE	B4	B4A	chr18	6318042	6318294	252	+	59.7542	0	60.7542	1.01551e-12
SINE	B2	B3A	chr5	119516546	119516752	206	+	59.6699	0	60.6699	7.66816e-13
SINE	B4	RSINE1	chr2	204231086	204231205	119	-	59.623	0	60.623	9.29726e-13
SINE	B2	B3	chr15	89228231	89228421	190	+	59.6036	0	60.6036	9.96303e-13
SINE	B2	B3A	chr8	110566709	110566854	145	+	59.6029	0	60.6029	6.25761e-12
SINE	B4	B4	chr18	26352928	26353216	288	+	59.5909	0	60.5909	8.59711e-13
SINE	Alu	PB1D10	chr3	149480986	149481074	88	-	59.5421	0	60.5421	2.5565e-12
SINE	B4	B4	chr7	61614378	61614662	284	+	59.5147	0	60.5147	8.19057e-13
SINE	B4	RSINE1	chr2	111664389	111664543	154	+	122.027	1.035	60.4555	2.85693e-12
SINE	B4	B4A	chr2	148487192	148487444	252	-	59.4533	0	60.4533	1.18683e-12
SINE	MIR	MIRb	chr5	156858609	156858817	208	+	59.4433	0	60.4433	7.82109e-13
SINE	Alu	B1_Rn	chr10	15543880	15544025	145	-	59.4242	0	60.4242	8.60732e-13
DNA	hAT-Charlie	URR1B	chr4	148762365	148762594	229	-	59.4175	0	60.4175	1.25163e-12
SINE	B2	B3	chr5	94480853	94481024	171	+	59.3468	0	60.3468	2.02374e-12
SINE	B2	B3A	chr7	114472194	114472305	111	-	59.2404	0	60.2404	7.71577e-13
SINE	ID	ID4_	chr7	139741301	139741370	69	-	59.1968	0	60.1968	8.75142e-13
SINE	B4	RSINE1	chr3	30678888	30678948	60	-	59.1894	0	60.1894	8.40021e-13
SINE	B4	ID_B1	chr12	40309830	40310044	214	+	59.1345	0	60.1345	3.2131e-12
SINE	B4	RSINE1	chr3	153831738	153831910	172	-	59.0678	0	60.0678	3.10128e-12
SINE	B2	B3A	chr4	111851984	111852113	129	+	59.0441	0	60.0441	7.9978e-13
SINE	B4	B4	chr10	42646023	42646146	123	-	59.0256	0	60.0256	2.0152e-12
SINE	B4	B4A	chr1	136107176	136107465	289	-	59	0	60	1.28232e-12
SINE	B4	B4A	chr16	77782697	77782984	287	-	59	0	60	6.3646e-13
SINE	Alu	B1F1	chr1	98887036	98887105	69	-	59	0	60	7.97333e-13
DNA	hAT-Charlie	RMER30	chr1	143953828	143954020	192	-	59	0	60	1.31665e-12
LTR	ERVK	RMER17C	chr6	15198124	15198364	240	+	183.114	2.07	59.972	1.68905e-12
DNA	hAT-Charlie	RCHARR1	chr10	21542787	21542873	86	+	58.9038	0	59.9038	1.90029e-12
SINE	B4	RSINE1	chr6	3589582	3589731	149	+	58.8826	0	59.8826	8.78719e-13
DNA	hAT-Charlie	URR1B	chr8	19654647	19654846	199	+	58.8472	0	59.8472	1.45534e-12
SINE	B4	B4	chr19	12083918	12084099	181	+	127.996	1.15677	59.8099	1.03972e-12
SINE	Alu	B1F	chr11	74108351	74108500	149	-	58.6467	0	59.6467	3.89776e-12
SINE	ID	ID4_	chr5	142858617	142858688	71	+	165.198	1.7903	59.5627	7.82109e-13
SINE	B4	B4A	chr14	110428521	110428795	274	-	58.5	0	59.5	9.11365e-13
SINE	B4	B4	chr12	25858897	25859150	253	-	58.5	0	59.5	1.27919e-12
LTR	ERVL-MaLR	ORR1E	chr4	67479756	67479891	135	-	58.5	0	59.5	1.28152e-12
SINE	B4	B4A	chr16	6219871	6220155	284	-	58.4635	0	59.4635	1.02261e-12
LTR	ERVL-MaLR	MTD	chr19	47943801	47943905	104	+	58.4413	0	59.4413	8.89021e-13
SINE	B2	B3A	chr13	37201396	37201516	120	+	58.4185	0	59.4185	8.37938e-13
SINE	B4	B4A	chr2	58049532	58049785	253	-	58.4073	0	59.4073	1.33375e-12
LTR	ERVL-MaLR	ORR1D2	chr17	94570474	94570761	287	+	58.311	0	59.311	8.00223e-13
SINE	B4	B4	chr7	137518706	137518951	245	+	58.2549	0	59.2549	8.01344e-13
SINE	B4	B4	chr2	82715394	82715650	256	-	67.0121	0.147857	59.2514	7.29739e-13
SINE	Alu	B1F	chr1	208305726	208305865	139	+	58.2338	0	59.2338	1.45972e-12
SINE	B2	B2_Rat2	chr5	142981586	142981772	186	+	58.2024	0	59.2024	1.29278e-12
SINE	B2	B3A	chr3	3216525	3216719	194	+	58.2007	0	59.2007	8.45714e-13
SINE	B2	B3A	chr15	100656728	100656912	184	-	58.188	0	59.188	9.25776e-13
SINE	Alu	B1_Rn	chr3	143704296	143704439	143	-	58.1717	0	59.1717	8.01329e-13
SINE	B2	B3	chr19	24878514	24878699	185	-	58.157	0	59.157	1.43474e-12
SINE	B4	RSINE1	chr11	68617881	68617995	114	-	58.1373	0	59.1373	1.2386e-12
SINE	Alu	B1_Mur4	chr3	17450604	17450744	140	+	58.1012	0	59.1012	6.35104e-12
SINE	B4	ID_B1	chr2	79311485	79311619	134	-	58.043	0	59.043	1.87668e-12
SINE	B4	B4	chr12	25643507	25643690	183	-	58.0323	0	59.0323	2.65773e-12
SINE	B4	RSINE1	chr6	25179561	25179712	151	-	58.0119	0	59.0119	1.43474e-12
SINE	B4	B4	chr8	116693715	116693965	250	+	58	0	59	1.86276e-12
SINE	MIR	MIR	chr1	175545063	175545276	213	-	58	0	59	7.81482e-13
SINE	B2	B3	chr1	99146119	99146320	201	+	58	0	59	8.10272e-13
SINE	B2	B3	chr5	142927422	142927615	193	-	58	0	59	8.14156e-13
SINE	B2	B3	chr4	161239467	161239658	191	+	58	0	59	1.4184e-12
SINE	Alu	B1F1	chr17	85209703	85209835	132	-	58	0	59	2.27705e-12
SINE	Alu	B1F1	chr16	6228380	6228510	130	+	58	0	59	1.32521e-12
SINE	ID	ID4_	chr12	25393155	25393229	74	-	58	0	59	2.50978e-12
LINE	L2	L2	chr1	163294917	163295134	217	+	58	0	59	1.1564e-12
SINE	B4	B4A	chr19	49337154	49337388	234	-	57.9093	0	58.9093	1.30009e-12
SINE	B4	RSINE1	chr1	207401582	207401702	120	+	57.9061	0	58.9061	3.23186e-12
SINE	B4	B4A	chr2	204230705	204230955	250	-	57.8879	0	58.8879	9.29726e-13
SINE	B2	B3A	chr13	11667782	11667952	170	+	57.8449	0	58.8449	2.25396e-12
SINE	B4	B4A	chr10	56589771	56589998	227	-	57.8288	0	58.8288	8.04931e-12
SINE	B4	B4A	chr11	74385293	74385490	197	-	57.651	0	58.651	8.4843e-13
SINE	B4	RSINE1	chr7	122392535	122392677	142	+	138.323	1.38	58.5391	2.10432e-12
SINE	B4	RSINE1	chr5	128285849	128285950	101	-	57.4834	0	58.4834	1.741e-12
SINE	B4	B4	chr19	57039748	57039897	149	-	81.7522	0.41748	58.3798	1.14365e-12
SINE	B4	B4A	chr14	79307896	79308070	174	+	57.3537	0	58.3537	1.33527e-12
LTR	ERVL	MT2A	chr17	59512151	59512399	248	-	57.2552	0	58.2552	7.77484e-13
SINE	B2	B3	chr16	1183344	1183538	194	-	57.2236	0	58.2236	1.79804e-12
SINE	B4	RSINE1	chr10	33096923	33097081	158	+	57.1996	0	58.1996	1.96155e-12
SINE	ID	ID4_	chr12	28760075	28760135	60	+	57.1502	0	58.1502	1.27912e-12
SINE	B4	B4A	chr16	54375284	54375549	265	+	57.1429	0	58.1429	8.01168e-13
SINE	B4	RSINE1	chr1	119842003	119842180	177	+	57.1332	0	58.1332	9.11554e-13
SINE	MIR	MIRb	chr10	83101875	83102065	190	-	57.1319	0	58.1319	4.53853e-12
SINE	Alu	B1F	chr17	92292112	92292227	115	-	57.1297	0	58.1297	1.49151e-12
SINE	B4	B4A	chr12	25944701	25944933	232	-	57.119	0	58.119	8.18788e-13
SINE	B2	B3A	chr1	137684157	137684329	172	+	57.0928	0	58.0928	4.16279e-12
SINE	Alu	B1_Rn	chr3	8842362	8842503	141	+	57.0926	0	58.0926	8.12592e-13
SINE	B4	B4A	chr10	64795620	64795797	177	+	57.0577	0	58.0577	8.75142e-13
SINE	B4	B4	chr1	173988621	173988873	252	+	57.0118	0	58.0118	8.31143e-13
SINE	Alu	B1_Mur1	chr16	2935440	2935561	121	-	57	0	58	1.21935e-12
SINE	B4	ID_B1	chr1	34065856	34065976	120	-	57	0	58	5.3825e-13
SINE	B2	B2_Rn2	chr8	125463176	125463296	120	-	57	0	58	8.18451e-13
SINE	B2	B3A	chr10	13935255	13935370	115	-	57	0	58	7.79631e-13
SINE	B4	RSINE1	chr3	147159454	147159562	108	-	57	0	58	7.37279e-13
SINE	Alu	PB1D10	chr8	48442563	48442671	108	+	57	0	58	1.60071e-12
LTR	ERVL-MaLR	ORR1E	chr19	12485619	12485838	219	+	57	0	58	8.17627e-13
LTR	ERVL-MaLR	MTD	chr1	188021919	188022116	197	-	57	0	58	1.19365e-12
LTR	ERVL	LTR33	chr11	68044708	68044873	165	-	57	0	58	1.61272e-12
SINE	B4	B4	chr13	36816075	36816353	278	+	177	2.07	57.9805	8.07576e-13
SINE	B4	ID_B1	chr1	185188298	185188480	182	+	74.0981	0.295714	57.9589	8.06429e-13
LTR	ERVK	RLTR20D	chr1	148250882	148251391	509	+	236.685	3.105	57.9013	9.81139e-13
SINE	B4	B4A	chr1	148023626	148023792	166	-	56.8962	0	57.8962	1.42527e-12
SINE	B4	B4A	chr10	9393788	9393970	182	+	56.847	0	57.847	9.7196e-13
SINE	B4	B4A	chr4	6884962	6885206	244	-	56.831	0	57.831	7.99706e-13
SINE	B4	B4	chr10	69857681	69857938	257	+	295.658	4.14	57.7156	8.14689e-13
SINE	B4	B4A	chr1	182906491	182906772	281	-	176.168	2.07	57.7094	1.43474e-12
SINE	B4	B4	chr1	158640025	158640273	248	-	56.6998	0	57.6998	8.96341e-13
SINE	Alu	B1F	chr9	20587276	20587406	130	+	56.6655	0	57.6655	7.82109e-13
SINE	B2	B3A	chr10	86189179	86189321	142	-	56.6625	0	57.6625	1.43495e-12
SINE	ID	ID_Rn2	chr7	121834679	121834775	96	+	56.5766	0	57.5766	1.35874e-12
SINE	B2	B3	chr9	63785090	63785259	169	+	56.5695	0	57.5695	8.99128e-13
SINE	B2	B3A	chr8	118596264	118596476	212	-	56.5123	0	57.5123	2.17531e-12
SINE	B4	B4A	chr19	47419692	47419882	190	-	56.5	0	57.5	8.34823e-13
SINE	B2	B2_Rat2	chr8	19527049	19527232	183	+	56.5	0	57.5	1.46913e-12
DNA	hAT-Charlie	MER58A	chr4	128932162	128932331	169	+	56.4973	0	57.4973	8.61143e-13
SINE	B4	RSINE1	chr17	85330878	85331169	291	+	294.478	4.14	57.486	7.41086e-12
DNA	hAT-Charlie	Charlie5	chr7	138959789	138959867	78	-	56.4167	0	57.4167	4.62422e-12
LTR	ERVL-MaLR	MTE2a	chr3	11299395	11299525	130	-	56.3333	0	57.3333	2.05985e-12
SINE	B4	RSINE1	chr8	108673925	108674038	113	+	56.3268	0	57.3268	2.01435e-12
SINE	B4	B4	chrX	46650500	46650753	253	-	56.1429	0	57.1429	7.9861e-13
SINE	B4	B4A	chr5	128460440	128460712	272	-	56.142	0	57.142	8.05037e-13
SINE	B2	B3A	chr1	188021497	188021655	158	-	56.1309	0	57.1309	1.19365e-12
LINE	L2	L2	chr1	227135500	227135648	148	-	56.0992	0	57.0992	2.20245e-12
LTR	ERVL-MaLR	ORR1E	chr8	27914403	27914764	361	-	174.25	2.07	57.0847	1.40336e-12
SINE	B2	B3	chr1	128664446	128664617	171	+	56.0128	0	57.0128	8.11416e-13
SINE	B4	B4A	chr11	16411254	16411527	273	+	56	0	57	8.30728e-13
SINE	B2	B3	chr7	103478823	103479022	199	-	56	0	57	8.10004e-13
SINE	B4	B4	chr13	83945707	83945883	176	+	56	0	57	2.23673e-12
SINE	Alu	B1F1	chr16	17849001	17849107	106	-	56	0	57	4.98058e-12
SINE	ID	ID4	chr4	130793941	130794005	64	-	56	0	57	9.81139e-13
LTR	ERVL-MaLR	MLT1J2	chr8	29374132	29374377	245	-	56	0	57	1.22951e-12
LINE	CR1	L3	chr6	26774712	26774823	111	+	56	0	57	8.10004e-13
DNA	hAT-Charlie	MER5A	chr8	112242881	112243044	163	+	56	0	57	8.04536e-13
LTR	ERVK	RLTR18-int	chr3	149102718	149103023	305	+	291.709	4.14	56.9473	5.91134e-12
SINE	B4	RSINE1	chr1	143885010	143885149	139	+	55.891	0	56.891	8.60776e-13
SINE	B2	B3	chr8	19949439	19949581	142	+	55.8603	0	56.8603	7.97686e-13
SINE	B4	B4	chr11	81457160	81457321	161	+	55.7539	0	56.7539	1.18347e-12
LTR	ERVK	RLTR21	chr4	75902737	75903020	283	+	114.45	1.035	56.7322	4.83312e-12
SINE	B4	B4A	chr8	127329798	127330061	263	-	55.7081	0	56.7081	1.22663e-12
SINE	B2	B3	chr1	119842369	119842582	213	+	55.6829	0	56.6829	9.11554e-13
SINE	B4	B4A	chr3	17443901	17444153	252	+	55.5833	0	56.5833	9.35097e-13
SINE	B2	B2_Rat4	chr6	86395869	86396012	143	-	55.5741	0	56.5741	2.27922e-12
SINE	B2	B3A	chr11	73772414	73772551	137	-	55.5425	0	56.5425	1.26251e-12
SINE	B4	B4A	chr5	65290040	65290290	250	-	55.4562	0	56.4562	1.225e-12
SINE	B2	B3A	chrX	139882891	139883136	245	-	55.4423	0	56.4423	1.65967e-12
LTR	ERVL	MT2B	chr3	171016117	171016275	158	-	55.4417	0	56.4417	2.09804e-12
SINE	B4	B4A	chr3	89533486	89533677	191	+	55.3546	0	56.3546	1.19421e-12
SINE	Alu	B1F	chr15	44520408	44520498	90	-	55.3333	0	56.3333	5.69936e-12
DNA	hAT-Charlie	URR1A	chr10	65848435	65848643	208	-	55.2818	0	56.2818	8.30486e-13
SINE	B4	RSINE1	chr6	88959747	88959884	137	+	404.676	6.21	56.2657	2.00701e-12
SINE	B2	B3	chr3	143704502	143704664	162	-	55.2345	0	56.2345	8.01329e-13
SINE	B2	B2_Rat4	chr5	94376063	94376225	162	-	55.1916	0	56.1916	7.81314e-13
DNA	hAT	MER99	chr4	75691083	75691273	190	-	55.1867	0	56.1867	9.81139e-13
SINE	B2	B3	chr3	155586660	155586871	211	+	55.1061	0	56.1061	8.51865e-13
LTR	ERVK	RMER6C	chr17	92290594	92290744	150	+	55.0833	0	56.0833	1.49151e-12
SINE	Alu	B1F1	chr11	34875430	34875561	131	+	55.073	0	56.073	8.38609e-13
SINE	B4	B4A	chr5	144437228	144437473	245	-	55.0294	0	56.0294	1.26166e-12
SINE	Alu	B1_Mur4	chr1	210220835	210220984	149	+	55.0294	0	56.0294	1.42291e-12
SINE	Alu	B1F	chr5	151735212	151735352	140	+	55.0209	0	56.0209	1.22882e-12
SINE	B2	B3	chr10	107791263	107791443	180	-	55.0127	0	56.0127	2.04151e-12
SINE	B4	B4A	chr10	108547428	108547694	266	+	55	0	56	8.33538e-13
SINE	Alu	B1_Mur1	chr16	70712497	70712652	155	+	55	0	56	2.66476e-12
SINE	Alu	B1_Mur2	chr18	56922682	56922823	141	+	55	0	56	1.2132e-12
Satellite	Satellite	ZP3AR	chr7	27715276	27715334	58	-	55	0	56	9.37582e-13
LTR	ERVL	MER74B	chr16	15483408	15483539	131	+	55	0	56	9.96854e-13
LINE	L2	L2	chr7	67573751	67573952	201	+	55	0	56	2.53246e-12
DNA	hAT-Charlie	RCHARR1	chr10	21542947	21542997	50	+	55	0	56	1.90029e-12
SINE	B2	B3	chr6	98107409	98107601	192	-	54.9975	0	55.9975	8.01561e-13
SINE	Alu	B1F	chr4	182713822	182713970	148	-	54.8106	0	55.8106	1.42001e-12
SINE	B4	RSINE1	chr6	138063839	138063964	125	-	54.7437	0	55.7437	8.19902e-13
SINE	B2	B3	chr5	36478133	36478331	198	-	54.7392	0	55.7392	2.0345e-12
LTR	ERVL-MaLR	ORR1D1	chr4	6407656	6407901	245	-	54.73	0	55.73	8.08569e-13
SINE	B2	B3A	chr16	37903003	37903139	136	-	54.7197	0	55.7197	5.09333e-13
SINE	B2	B3A	chr10	95106787	95106939	152	-	54.7004	0	55.7004	7.82109e-13
SINE	B2	B3	chr5	61855795	61856021	226	-	54.7	0	55.7	8.10824e-13
SINE	B4	B4A	chr8	119563184	119563451	267	-	54.619	0	55.619	8.66454e-13
SINE	B4	ID_B1	chr11	69179841	69179978	137	+	54.6168	0	55.6168	8.22639e-13
SINE	B4	RSINE1	chr8	6065206	6065380	174	+	65.0626	0.188182	55.5997	8.66251e-13
SINE	B2	B3A	chr14	111152381	111152527	146	-	54.5771	0	55.5771	7.9732e-13
LTR	ERVL	MT2B	chr13	46575948	46576110	162	+	54.5123	0	55.5123	5.16979e-13
SINE	B4	B4A	chr8	70650637	70650903	266	-	54.5	0	55.5	8.30728e-13
SINE	B4	B4A	chr12	25847062	25847220	158	-	54.5	0	55.5	2.105e-12
SINE	B2	B3	chr6	138064021	138064173	152	-	54.5	0	55.5	8.19902e-13
LINE	L1	RNHAL1	chr9	84042845	84043012	167	-	54.5	0	55.5	1.39757e-12
SINE	B2	B3A	chr8	50871378	50871541	163	-	54.4939	0	55.4939	2.84623e-12
SINE	B4	RSINE1	chr1	186839999	186840140	141	-	54.479	0	55.479	8.10332e-13
SINE	Alu	B1F	chr14	111075051	111075192	141	-	54.4261	0	55.4261	5.76453e-13
DNA	hAT-Charlie	MER5A	chr8	108788677	108788817	140	-	54.4215	0	55.4215	1.65858e-12
SINE	B4	B4A	chr1	129972770	129973019	249	+	54.3375	0	55.3375	1.24913e-12
SINE	B2	B3A	chr7	89516299	89516432	133	+	54.3313	0	55.3313	1.11375e-12
SINE	Alu	PB1D10	chr15	101069300	101069409	109	-	54.3282	0	55.3282	6.99546e-13
SINE	B2	B2_Rat4	chr4	56675571	56675725	154	-	54.2969	0	55.2969	7.98637e-13
SINE	B4	B4A	chr11	70782492	70782741	249	+	54.2638	0	55.2638	8.06244e-13
SINE	B4	B4A	chr15	45735341	45735543	202	-	54.2495	0	55.2495	2.00928e-12
SINE	Alu	B1F2	chr3	675165	675318	153	-	214.333	2.898	55.2419	2.3882e-12
SINE	B4	ID_B1	chr1	76461779	76461988	209	+	86.8482	0.591428	55.2009	8.23462e-13
SINE	B4	B4A	chr15	13869046	13869198	152	-	65.5	0.207	55.0953	1.38701e-12
SINE	B4	RSINE1	chr17	63064434	63064564	130	-	54.0899	0	55.0899	9.41974e-13
SINE	B2	B3	chr1	236825625	236825828	203	+	54.0676	0	55.0676	8.78719e-13
SINE	B4	B4	chr6	91687926	91688187	261	+	54.0667	0	55.0667	7.9847e-13
SINE	Alu	B1_Mur1	chr8	93673885	93674034	149	+	54.0353	0	55.0353	3.39156e-12
SINE	B4	B4	chr2	38122806	38123060	254	-	54.0307	0	55.0307	8.01811e-13
SINE	Alu	B1_Mur1	chr19	40964883	40965028	145	-	54.02	0	55.02	1.27634e-12
SINE	B4	B4	chr1	149640888	149641148	260	+	54	0	55	7.70362e-13
SINE	B4	B4A	chr17	82551401	82551636	235	-	54	0	55	8.02699e-13
SINE	B4	B4	chr10	94659034	94659261	227	-	54	0	55	7.98152e-13
SINE	B4	B4	chr10	85955127	85955313	186	+	54	0	55	7.37279e-13
SINE	B4	ID_B1	chr14	43989672	43989847	175	+	54	0	55	8.32474e-13
SINE	B4	RSINE1	chr1	208305382	208305541	159	+	54	0	55	1.45972e-12
SINE	B2	B3	chr3	155597658	155597805	147	-	54	0	55	1.49151e-12
SINE	Alu	B1F1	chr6	129953250	129953345	95	-	54	0	55	4.44417e-12
LTR	ERVL	RMER15	chr6	88871964	88872075	111	+	54	0	55	9.7409e-13
DNA	hAT-Charlie	MER5A	chr4	34091336	34091510	174	+	54	0	55	8.78572e-13
SINE	B2	B3	chr8	118580454	118580660	206	-	60.6165	0.121765	54.9282	8.07576e-13
SINE	B2	B3	chr1	44956460	44956657	197	-	53.9028	0	54.9028	9.81139e-13
SINE	B4	B4A	chr5	94599866	94600154	288	+	167.5	2.07	54.886	1.37882e-12
SINE	B4	RSINE1	chr7	58898879	58898997	118	-	53.8832	0	54.8832	1.78225e-12
SINE	B2	B3A	chr5	142158248	142158422	174	-	53.8606	0	54.8606	7.8665e-13
SINE	B2	B3A	chr8	19654311	19654451	140	+	53.817	0	54.817	1.45534e-12
SINE	Alu	PB1D7	chr4	6691533	6691643	110	-	53.716	0	54.716	1.61018e-12
SINE	B4	RSINE1	chr1	95866884	95867021	137	+	53.6674	0	54.6674	7.82109e-13
SINE	B4	B4	chr8	127389043	127389277	234	+	53.6361	0	54.6361	7.76118e-13
SINE	B2	B3	chr8	85134357	85134566	209	-	53.6278	0	54.6278	1.1564e-12
SINE	B4	RSINE1	chr7	114864774	114864906	132	+	53.6047	0	54.6047	7.37279e-13
SINE	B4	B4A	chr2	224761186	224761436	250	+	53.5882	0	54.5882	1.23927e-12
DNA	TcMar-Tigger	MER2	chr1	175557321	175557484	163	+	53.5581	0	54.5581	7.97353e-13
LTR	ERVL-MaLR	MLT1B	chr5	168539953	168540134	181	+	124.262	1.29786	54.5125	1.3326e-12
LINE	L2	L2	chr8	79951132	79951326	194	-	53.5	0	54.5	3.39356e-12
DNA	hAT-Charlie	RCHARR1	chr1	97040993	97041534	541	+	166.28	2.07	54.4886	1.14621e-12
SINE	B2	B3	chr14	21054537	21054712	175	+	53.4309	0	54.4309	1.33843e-12
SINE	B4	RSINE1	chr18	74098523	74098676	153	-	53.423	0	54.423	1.42527e-12
SINE	B4	B4A	chr12	25910229	25910473	244	-	53.3837	0	54.3837	8.87631e-13
SINE	B2	B3	chr2	30490333	30490452	119	+	53.3746	0	54.3746	1.42288e-12
SINE	B4	RSINE1	chr4	47619936	47620087	151	-	53.3438	0	54.3438	8.62919e-13
LINE	CR1	L3	chr4	43510826	43510931	105	-	53.3333	0	54.3333	8.37938e-13
SINE	B4	B4A	chr1	175523050	175523341	291	-	165.771	2.07	54.3228	1.72505e-12
SINE	B4	B4A	chr15	15106350	15106512	162	+	53.3224	0	54.3224	8.78121e-13
SINE	B4	RSINE1	chr1	159436216	159436358	142	-	53.2539	0	54.2539	1.96143e-12
SINE	Alu	B1F	chr11	69761496	69761642	146	-	53.25	0	54.25	1.60071e-12
SINE	B4	B4A	chr5	96327379	96327642	263	+	53.2447	0	54.2447	1.86555e-12
LTR	ERVL-MaLR	ORR1C2	chr7	49289485	49289648	163	+	53.1994	0	54.1994	5.03481e-13
SINE	ID	BC1_Rn	chr6	135321706	135321807	101	-	53.1667	0	54.1667	9.1392e-13
SINE	B4	B4A	chr9	55791427	55791614	187	+	53.1632	0	54.1632	8.31829e-13
LTR	ERVL-MaLR	MTEa	chr19	47404844	47405066	222	-	53.1199	0	54.1199	7.99153e-13
SINE	B4	ID_B1	chr10	35863424	35863545	121	+	53.108	0	54.108	8.72839e-13
SINE	B2	B3	chr13	36778081	36778277	196	+	165	2.07	54.0717	1.18285e-12
SINE	B2	B3A	chr7	123370267	123370418	151	-	53.0564	0	54.0564	9.43898e-13
SINE	Alu	B1_Rn	chr10	105766891	105767020	129	+	108.981	1.035	54.0447	8.15727e-12
SINE	B4	B4A	chr2	111818562	111818742	180	+	53.0392	0	54.0392	8.56444e-13
SINE	B4	B4A	chr13	75173007	75173146	139	-	53.0312	0	54.0312	8.16483e-13
SINE	B4	B4A	chr8	44596995	44597251	256	-	53.0208	0	54.0208	8.4104e-13
SINE	B4	B4A	chr13	99336567	99336743	176	-	53	0	54	1.35679e-12
SINE	B4	ID_B1	chr5	151730913	151731085	172	+	53	0	54	8.24194e-13
SINE	B4	ID_B1	chr17	19609961	19610089	128	+	53	0	54	8.17627e-13
LTR	ERVK	RLTR26	chr5	95535552	95535799	247	+	53	0	54	7.37279e-13
LTR	ERVK	RMER12	chr1	235574652	235574855	203	-	53	0	54	7.62843e-13
SINE	MIR	MIR	chr1	48799387	48799630	243	-	52.9865	0	53.9865	8.01626e-13
SINE	B2	B3	chr6	136407584	136407737	153	+	52.9815	0	53.9815	1.38606e-12
SINE	MIR	MIRb	chr8	76307558	76307691	133	-	52.9289	0	53.9289	7.16546e-13
SINE	B2	B3A	chr14	104006460	104006631	171	-	52.8733	0	53.8733	1.07016e-12
SINE	B2	B3A	chrX	159830692	159830890	198	+	52.8333	0	53.8333	8.07576e-13
SINE	B4	RSINE1	chr10	59644252	59644358	106	-	52.8318	0	53.8318	2.42541e-12
SINE	Alu	B1_Mur4	chr10	10776779	10776921	142	+	52.8259	0	53.8259	2.19105e-12
SINE	B4	B4A	chr17	71731906	71732044	138	+	52.6031	0	53.6031	8.61305e-13
rRNA	rRNA	SSU-rRNA_Hsa	chr2	505145	505446	301	+	1125.4	20.0438	53.5265	5.42817e-11
SINE	Alu	PB1D10	chr19	14549315	14549380	65	-	52.4567	0	53.4567	2.68733e-12
SINE	B4	B4A	chr10	68461041	68461293	252	-	52.4259	0	53.4259	9.15114e-13
SINE	B4	RSINE1	chr2	113988306	113988410	104	-	52.3817	0	53.3817	1.03691e-12
SINE	B2	B3A	chr4	120100951	120101138	187	+	52.3192	0	53.3192	1.76266e-12
SINE	B2	B3	chr7	26935954	26936136	182	-	52.3084	0	53.3084	8.06138e-13
SINE	B4	B4	chr4	90880557	90880762	205	-	52.2976	0	53.2976	7.9744e-13
LTR	ERVL-MaLR	MLT1C	chr19	47512371	47512630	259	-	52.2184	0	53.2184	8.12711e-13
SINE	B4	B4A	chr18	72065411	72065669	258	-	52.2126	0	53.2126	8.54677e-13
SINE	B4	B4A	chr12	25655288	25655477	189	-	52.2105	0	53.2105	1.1846e-12
SINE	B4	B4A	chr10	9435464	9435721	257	+	52.1982	0	53.1982	6.51263e-13
LTR	ERVL-MaLR	MLT1B	chr18	61162951	61163108	157	-	52.1751	0	53.1751	8.24629e-13
SINE	B2	B3A	chr8	57996053	57996231	178	+	59.9833	0.147857	53.1279	1.75559e-12
SINE	B4	B4A	chr1	197193934	197194081	147	-	52.1049	0	53.1049	3.16537e-12
SINE	B2	B3	chr8	114580912	114581079	167	-	52.0721	0	53.0721	1.1884e-12
SINE	Alu	PB1D10	chr10	86783316	86783411	95	+	52.05	0	53.05	8.07576e-13
SINE	B4	RSINE1	chr2	144874362	144874513	151	+	52.0361	0	53.0361	1.99667e-12
SINE	B4	B4A	chr4	120204481	120204724	243	-	52.0123	0	53.0123	1.29188e-12
SINE	B4	B4A	chr7	130694433	130694680	247	-	52.0114	0	53.0114	2.1095e-12
SINE	B4	B4	chr6	59874084	59874322	238	-	52	0	53	1.35552e-12
SINE	B2	B3	chr7	1750048	1750257	209	-	52	0	53	8.08225e-13
SINE	B2	B3	chr8	114527576	114527770	194	-	52	0	53	1.98807e-12
SINE	B2	B3	chr14	82600026	82600219	193	+	52	0	53	1.41752e-12
SINE	Alu	B1_Mur2	chr17	92259223	92259366	143	+	52	0	53	1.96375e-12
SINE	B2	B3	chr5	172353661	172353783	122	+	52	0	53	2.20872e-12
SINE	B4	RSINE1	chr10	85955604	85955718	114	+	52	0	53	7.37279e-13
SINE	ID	BC1_Rn	chr13	45914274	45914351	77	+	52	0	53	1.77075e-12
SINE	B4	B4	chr3	37125322	37125385	63	-	52	0	53	9.08171e-13
DNA	hAT-Charlie	MER5A	chr5	124696095	124696276	181	-	52	0	53	1.87668e-12
DNA	hAT-Charlie	MER20	chr5	161391452	161391598	146	+	52	0	53	2.27884e-12
SINE	B4	B4A	chr7	139670388	139670507	119	-	51.912	0	52.912	1.18095e-12
DNA	hAT-Charlie	URR1B	chr7	95868743	95868959	216	+	51.7641	0	52.7641	1.20184e-12
SINE	B4	RSINE1	chr13	68090412	68090580	168	-	51.75	0	52.75	1.16461e-12
LTR	ERV1	RLTR23	chr4	47653142	47653300	158	+	51.7178	0	52.7178	1.42527e-12
SINE	B4	B4	chr19	56364699	56364922	223	-	51.7143	0	52.7143	7.79331e-13
SINE	B4	B4	chr10	9121695	9121892	197	+	51.6963	0	52.6963	1.94837e-12
SINE	MIR	MIRb	chr10	69860748	69860879	131	-	51.6556	0	52.6556	9.78209e-13
SINE	Alu	PB1D7	chr4	161239122	161239205	83	-	51.642	0	52.642	1.4184e-12
SINE	B2	B3A	chr16	37875325	37875456	131	-	51.5528	0	52.5528	5.09333e-13
LTR	ERVK	RMER12	chr10	102772506	102772708	202	-	160.285	2.07	52.5358	6.567e-12
SINE	B4	RSINE1	chr2	144955866	144956021	155	+	65.0933	0.25875	52.5071	1.16461e-12
SINE	B2	B3A	chr9	33043144	33043322	178	-	51.5	0	52.5	2.19294e-12
SINE	Alu	PB1D7	chr1	65557253	65557372	119	-	51.5	0	52.5	1.12658e-12
SINE	B4	B4A	chr2	111281892	111282101	209	+	51.4587	0	52.4587	8.33403e-13
SINE	Alu	PB1D9	chr9	84071493	84071607	114	+	51.4279	0	52.4279	8.01387e-13
LTR	ERVL-MaLR	MLT1I	chr7	133154732	133154976	244	+	51.4096	0	52.4096	1.37884e-12
SINE	B2	B3A	chr6	126175098	126175272	174	+	51.3992	0	52.3992	8.65204e-13
SINE	Alu	PB1D9	chr10	46835155	46835250	95	+	159.848	2.07	52.3935	3.00638e-12
SINE	Alu	B1F	chr14	71637618	71637767	149	+	51.3933	0	52.3933	2.74185e-12
SINE	Alu	B1_Rn	chr6	35933993	35934132	139	-	51.3333	0	52.3333	2.15839e-12
SINE	B4	B4A	chr1	26127583	26127818	235	-	51.3221	0	52.3221	8.35714e-13
SINE	B4	RSINE1	chr8	49006686	49006838	152	-	51.3149	0	52.3149	2.2135e-12
SINE	B2	B3	chr16	83917999	83918204	205	+	51.2284	0	52.2284	1.3421e-12
SINE	B2	B3A	chr6	98187433	98187628	195	+	51.1651	0	52.1651	1.84538e-12
SINE	Alu	B1_Mur1	chr2	224682775	224682923	148	+	51.1642	0	52.1642	8.32398e-13
SINE	B4	RSINE1	chr15	105432382	105432507	125	-	51.1533	0	52.1533	1.14621e-12
DNA	hAT-Charlie	URR1B	chr7	26751120	26751335	215	-	51.1504	0	52.1504	2.09081e-12
SINE	Alu	B1F2	chr3	147083906	147084044	138	-	51.1342	0	52.1342	8.09439e-13
LTR	ERVL-MaLR	MTD	chr19	49302971	49303195	224	-	51.1098	0	52.1098	7.56644e-13
SINE	B4	ID_B1	chr10	97201791	97201978	187	-	51.0649	0	52.0649	2.29615e-12
SINE	B4	B4	chr3	34187853	34188022	169	+	51.0417	0	52.0417	2.18551e-12
SINE	Alu	B1F	chr10	46574986	46575032	46	+	51.041	0	52.041	9.81139e-13
SINE	B4	RSINE1	chr4	5130438	5130565	127	-	51.0185	0	52.0185	1.23669e-12
SINE	B4	B4A	chr1	149075648	149075889	241	-	51	0	52	1.26482e-12
SINE	B4	ID_B1	chr12	12175837	12176059	222	-	51	0	52	1.27197e-12
SINE	B4	B4A	chr10	3047857	3048070	213	+	51	0	52	8.17095e-13
SINE	B4	ID_B1	chr3	133020869	133021082	213	+	51	0	52	8.05344e-13
SINE	B2	B3A	chr18	17576797	17576937	140	+	51	0	52	1.19365e-12
SINE	Alu	B1_Mur3	chr1	38144293	38144417	124	+	51	0	52	1.51113e-12
SINE	ID	ID_Rn1	chr16	85279589	85279685	96	+	51	0	52	1.31665e-12
SINE	ID	ID2	chrX	146798631	146798711	80	+	51	0	52	4.73359e-12
SINE	ID	ID4_	chr5	154122792	154122851	59	+	51	0	52	1.21532e-12
SINE	Alu	B1F	chr5	151731420	151731546	126	+	50.983	0	51.983	8.24194e-13
SINE	B4	B4	chr8	73370793	73370986	193	-	50.9459	0	51.9459	8.3404e-13
SINE	B2	B3	chr7	21130356	21130535	179	+	50.9445	0	51.9445	4.89629e-12
SINE	B4	RSINE1	chr3	37091471	37091604	133	-	50.9423	0	51.9423	7.56278e-13
SINE	Alu	PB1D9	chr10	63092472	63092579	107	+	50.9092	0	51.9092	1.16461e-12
SINE	B2	B3A	chr2	224472904	224472999	95	-	179.659	2.484	51.8539	1.91247e-12
SINE	B4	B4A	chr5	86086797	86086999	202	+	50.8399	0	51.8399	8.49875e-13
SINE	Alu	B1_Mur3	chr2	30481210	30481345	135	+	50.8333	0	51.8333	1.71844e-12
DNA	TcMar-Tigger	Tigger7	chr17	27646402	27646549	147	-	50.8236	0	51.8236	1.48148e-12
SINE	B4	B4A	chr13	83932825	83933056	231	+	50.8071	0	51.8071	8.56883e-13
LINE	L2	L2	chr2	224378843	224379205	362	+	158.029	2.07	51.801	1.99667e-12
SINE	B2	B3A	chr1	4277743	4277920	177	+	50.7333	0	51.7333	8.13417e-13
SINE	B4	B4A	chr10	109536307	109536475	168	+	61.4034	0.207	51.7012	6.24141e-13
LTR	ERVK	RNLTR2a	chr4	29914874	29914985	111	-	50.7009	0	51.7009	9.68842e-13
SINE	B2	B3	chr8	102177536	102177706	170	+	50.625	0	51.625	9.30451e-13
SINE	B4	B4A	chr5	142857515	142857820	305	+	182.52	2.55908	51.5639	7.82109e-13
SINE	B4	ID_B1	chr3	133894619	133894863	244	+	50.5613	0	51.5613	8.61143e-13
SINE	B2	B3	chr5	141758522	141758674	152	+	50.5611	0	51.5611	9.0919e-13
SINE	Alu	B1_Rn	chr10	21389361	21389509	148	+	50.5485	0	51.5485	4.02472e-12
SINE	B4	B4A	chr1	120111684	120111915	231	-	50.5476	0	51.5476	6.9137e-12
LTR	ERVK	RMER3	chr7	136802157	136802229	72	-	50.5107	0	51.5107	8.65707e-13
SINE	B2	B3A	chr16	37868881	37869019	138	-	50.5106	0	51.5106	5.09333e-13
SINE	B4	RSINE1	chr7	103532718	103532873	155	+	50.5066	0	51.5066	3.12968e-12
SINE	B4	B4A	chr8	46068270	46068506	236	+	50.4278	0	51.4278	8.30728e-13
SINE	B2	B3A	chr6	40285883	40286055	172	+	50.3575	0	51.3575	8.4843e-13
LTR	ERVL-MaLR	ORR1D1	chr10	10776946	10777132	186	+	50.3546	0	51.3546	2.19105e-12
SINE	B4	ID_B1	chr19	24842483	24842682	199	+	50.314	0	51.314	7.99502e-13
SINE	B2	B2_Rn2	chr11	10876858	10876932	74	-	50.2897	0	51.2897	1.46752e-12
LTR	ERVK	RMER12	chr1	230053902	230054142	240	+	50.2545	0	51.2545	1.45464e-12
SINE	B4	B4A	chr19	42616580	42616812	232	-	57.8262	0.147857	51.2487	5.141e-13
SINE	Alu	B1_Mur4	chr9	86175572	86175684	112	-	50.238	0	51.238	7.68286e-13
SINE	B4	B4	chr1	133994415	133994631	216	+	50.2035	0	51.2035	8.02881e-13
SINE	B2	B3A	chr5	95168870	95169025	155	+	50.1543	0	51.1543	1.94646e-12
SINE	B4	RSINE1	chr12	25610382	25610563	181	-	50.1451	0	51.1451	2.88543e-12
SINE	B4	RSINE1	chr5	136598369	136598487	118	+	50.1398	0	51.1398	8.00162e-13
SINE	B4	ID_B1	chr2	3224221	3224348	127	+	50.1304	0	51.1304	7.9732e-13
LTR	ERVL-MaLR	MLT1F	chr17	82555625	82555797	172	-	50.125	0	51.125	7.56278e-13
LTR	ERVK	RMER13A	chr14	66602208	66602351	143	-	50.116	0	51.116	1.14621e-12
SINE	Alu	PB1D10	chr1	85524709	85524815	106	-	50.104	0	51.104	3.05442e-12
DNA	TcMar-Tigger	MER2	chr8	108654839	108655060	221	-	50.087	0	51.087	1.18637e-12
SINE	B4	RSINE1	chr8	20548240	20548402	162	-	50.0833	0	51.0833	7.78875e-13
Satellite	Satellite	ISAT_RN	chr6	14717803	14718039	236	+	50.0809	0	51.0809	1.41813e-12
SINE	B4	B4A	chr3	29999083	29999322	239	-	50	0	51	8.11404e-13
SINE	MIR	MIR	chr5	125037571	125037799	228	-	50	0	51	9.10532e-13
SINE	B2	B3	chr7	114853154	114853361	207	+	50	0	51	8.45177e-13
SINE	MIR	MIR	chr13	44439015	44439208	193	+	50	0	51	8.17547e-13
SINE	B4	RSINE1	chr1	117942304	117942444	140	-	50	0	51	1.59144e-12
SINE	B4	B4	chr12	25847465	25847605	140	-	50	0	51	2.105e-12
SINE	B4	B4A	chr14	111946868	111946995	127	-	50	0	51	7.98824e-13
SINE	B4	B4A	chr12	35468178	35468243	65	-	50	0	51	8.10244e-13
SINE	MIR	MIRb	chr10	21702798	21702852	54	-	50	0	51	1.57335e-12
DNA	hAT-Charlie	MER5B	chr8	29536265	29536432	167	-	50	0	51	1.38496e-12
SINE	B4	B4A	chr1	4171195	4171401	206	+	49.9898	0	50.9898	8.30728e-13
LINE	CR1	L3	chr1	143953507	143953585	78	+	49.9891	0	50.9891	1.31665e-12
SINE	B4	RSINE1	chr3	156941989	156942159	170	+	155.374	2.07	50.9362	1.42391e-12
DNA	hAT-Charlie	RCHARR1	chr10	21543031	21543293	262	+	365.991	6.21	50.9003	1.90029e-12
SINE	B4	B4	chr7	117601198	117601297	99	+	49.8937	0	50.8937	1.51186e-12
SINE	Alu	B1_Mur2	chr8	93666633	93666779	146	-	49.8828	0	50.8828	2.18894e-12
DNA	hAT-Charlie	Charlie5	chr11	5192094	5192282	188	-	49.8728	0	50.8728	2.85807e-12
SINE	B2	B3	chr5	14837414	14837615	201	+	49.8333	0	50.8333	1.2287e-12
SINE	B4	RSINE1	chr17	27629647	27629816	169	+	49.75	0	50.75	1.05508e-12
SINE	B4	B4	chr4	161273998	161274191	193	-	49.7263	0	50.7263	5.86448e-13
SINE	Alu	B1F1	chr1	158674227	158674350	123	+	49.7145	0	50.7145	8.03675e-13
LTR	ERVK	BGLII_B	chr3	153457099	153457311	212	-	49.706	0	50.706	7.25988e-13
SINE	B2	B3	chr7	139423592	139423790	198	-	49.6819	0	50.6819	7.71349e-13
SINE	B4	B4A	chr3	117237101	117237275	174	-	49.6329	0	50.6329	8.13803e-12
SINE	B4	B4A	chr4	105134443	105134557	114	-	49.5691	0	50.5691	1.38244e-12
SINE	B2	B3	chr11	70229556	70229728	172	+	49.5569	0	50.5569	7.54387e-13
SINE	Alu	B1_Mur3	chr6	71781766	71781906	140	+	49.5398	0	50.5398	8.16656e-13
SINE	Alu	B1_Rn	chr6	76067134	76067269	135	-	49.5385	0	50.5385	1.14254e-12
SINE	B4	RSINE1	chr3	17457974	17458113	139	+	49.5233	0	50.5233	8.30728e-13
LTR	ERVK	RLTR22_Mur	chr9	52885509	52885736	227	-	49.5222	0	50.5222	9.26215e-13
SINE	Alu	B1_Rn	chr19	53359513	53359656	143	+	49.5069	0	50.5069	1.40446e-12
SINE	B2	B3	chr10	56630102	56630300	198	-	49.5022	0	50.5022	8.1032e-13
SINE	B2	B3A	chr20	10802965	10803131	166	+	49.5	0	50.5	8.10004e-13
SINE	B4	B4A	chr1	134181880	134182082	202	+	154	2.07	50.4886	3.13796e-12
SINE	B4	B4A	chr11	13967531	13967760	229	+	153.967	2.07	50.4779	1.42527e-12
SINE	B4	ID_B1	chr13	82932457	82932580	123	+	49.4599	0	50.4599	8.1811e-13
DNA	hAT-Charlie	MER5A	chr19	48554275	48554385	110	-	49.4143	0	50.4143	1.49151e-12
SINE	B4	RSINE1	chr5	3084459	3084627	168	+	49.3333	0	50.3333	1.32521e-12
SINE	Alu	B1F	chr6	106591382	106591502	120	-	49.3081	0	50.3081	8.24609e-13
SINE	Alu	B1F1	chr1	158164689	158164819	130	+	49.2974	0	50.2974	2.03464e-12
SINE	B2	B3	chr11	75356385	75356583	198	+	49.2909	0	50.2909	1.20012e-12
LTR	ERVL-MaLR	ORR1E	chr1	134221871	134222070	199	+	49.2777	0	50.2777	2.14743e-12
SINE	B2	B3	chr1	46466212	46466364	152	+	49.25	0	50.25	1.87668e-12
SINE	B4	RSINE1	chr6	968007	968162	155	-	49.2095	0	50.2095	8.17565e-13
SINE	B4	B4A	chr3	124347479	124347723	244	+	49.1715	0	50.1715	8.98506e-13
SINE	B4	B4A	chr20	22347975	22348166	191	-	49.1668	0	50.1668	9.15621e-13
SINE	Alu	B1F	chr12	32164832	32164965	133	+	49.0907	0	50.0907	7.98635e-13
SINE	Alu	PB1D10	chr4	10495814	10495954	140	-	49.0788	0	50.0788	7.50038e-13
DNA	hAT-Charlie	URR1B	chr20	43973821	43974026	205	+	49.0167	0	50.0167	1.164e-12
SINE	B4	RSINE1	chrX	93467432	93467493	61	+	49.0005	0	50.0005	1.45972e-12
SINE	B4	ID_B1	chr4	56673642	56673832	190	-	49	0	50	7.98637e-13
SINE	B4	B4A	chr4	105134718	105134873	155	-	49	0	50	1.38244e-12
SINE	MIR	MIR	chr19	12485329	12485476	147	+	49	0	50	8.17627e-13
SINE	Alu	B1_Mur1	chr14	45394489	45394623	134	+	49	0	50	3.41404e-12
SINE	Alu	PB1D10	chr8	46046010	46046132	122	+	49	0	50	7.37279e-13
SINE	Alu	PB1D7	chr2	34914728	34914846	118	+	49	0	50	4.7897e-12
SINE	B4	B4A	chr4	156364279	156364393	114	+	49	0	50	7.99407e-13
SINE	MIR	MIR	chr20	22294121	22294214	93	-	49	0	50	1.73949e-12
SINE	Alu	B1_Rn	chr3	169216632	169216759	127	-	48.95	0	49.95	1.29223e-12
SINE	B4	B4	chr11	14012419	14012679	260	+	100.529	1.035	49.8914	8.61143e-13
SINE	B4	ID_B1	chr4	5127159	5127298	139	-	48.8019	0	49.8019	1.44672e-12
SINE	B2	B3A	chr17	12554322	12554509	187	-	48.799	0	49.799	7.57396e-13
SINE	B2	B3A	chr10	59644027	59644218	191	-	48.6667	0	49.6667	2.42541e-12
SINE	B2	B3A	chr12	39725497	39725657	160	+	48.6667	0	49.6667	9.14898e-13
SINE	B4	RSINE1	chr4	173168081	173168199	118	-	48.6514	0	49.6514	7.56278e-13
SINE	B4	RSINE1	chr18	27430810	27430951	141	+	48.6478	0	49.6478	1.90904e-12
SINE	B2	B2_Rat2	chr8	108640175	108640380	205	+	55.9873	0.147857	49.6467	5.04904e-13
SINE	B4	B4	chr11	31680783	31680852	69	+	48.6429	0	49.6429	2.35423e-12
SINE	B4	B4A	chr17	71798017	71798266	249	+	151.358	2.07	49.628	1.62362e-12
SINE	B4	RSINE1	chr12	25634902	25635060	158	+	48.6	0	49.6	7.82109e-13
SINE	B4	RSINE1	chr7	111130879	111131015	136	+	48.5947	0	49.5947	1.39757e-12
SINE	B4	B4A	chr6	63789786	63790066	280	-	151.215	2.07	49.5814	2.08667e-12
SINE	Alu	B1F	chr7	127870320	127870449	129	-	48.5429	0	49.5429	2.1212e-12
SINE	B4	RSINE1	chr3	148143109	148143222	113	-	48.5391	0	49.5391	7.82235e-13
SINE	B4	RSINE1	chr14	111074389	111074516	127	-	48.4924	0	49.4924	5.76453e-13
SINE	B4	ID_B1	chr3	133021485	133021551	66	+	48.4809	0	49.4809	8.05344e-13
SINE	B2	B3A	chr3	12902178	12902341	163	+	48.3369	0	49.3369	7.45441e-13
SINE	B4	B4	chr10	46604464	46604615	151	+	48.2976	0	49.2976	8.32197e-13
LTR	ERVK	RMER12	chr20	49955112	49955214	102	+	48.25	0	49.25	6.78636e-13
SINE	Alu	B1_Mur3	chr19	24877708	24877846	138	-	48.243	0	49.243	1.43474e-12
SINE	ID	ID_Rn2	chr16	62527918	62527986	68	+	150	2.07	49.1857	2.0008e-12
SINE	B2	B3A	chr16	37890074	37890212	138	-	48.1284	0	49.1284	5.09333e-13
SINE	B2	B3A	chr18	2037978	2038152	174	+	48.1111	0	49.1111	1.29671e-12
SINE	B4	B4A	chr3	59940610	59940815	205	+	65.0211	0.345001	49.0863	1.27628e-12
SINE	B2	B3A	chr16	37867988	37868123	135	-	48.0852	0	49.0852	5.09333e-13
SINE	B2	B3A	chr16	37875693	37875860	167	-	48.0833	0	49.0833	5.09333e-13
SINE	B2	B3	chr2	45438333	45438527	194	-	48.045	0	49.045	8.53553e-13
SINE	B4	RSINE1	chr12	25803569	25803731	162	-	48.025	0	49.025	8.28556e-13
LTR	ERVK	RMER12	chr13	98855742	98855950	208	+	48.0212	0	49.0212	7.2802e-12
SINE	B4	B4A	chr7	137627994	137628224	230	-	48.0115	0	49.0115	8.78103e-13
SINE	B2	B3A	chr13	36744769	36744969	200	+	48	0	49	1.17484e-12
SINE	B4	B4A	chr13	40292428	40292594	166	+	48	0	49	7.93081e-13
SINE	B4	B4A	chr4	146820126	146820291	165	-	48	0	49	8.61143e-13
SINE	B4	RSINE1	chr19	25352986	25353143	157	+	48	0	49	8.53636e-13
SINE	B4	RSINE1	chr4	177724961	177725105	144	-	48	0	49	9.81139e-13
SINE	Alu	B1F	chr8	93673347	93673472	125	-	48	0	49	3.39156e-12
SINE	Alu	PB1D10	chr10	90065214	90065328	114	-	48	0	49	1.60071e-12
SINE	B4	RSINE1	chr19	29149306	29149406	100	-	48	0	49	1.38439e-12
SINE	MIR	MIRb	chr1	17749178	17749277	99	-	48	0	49	1.38315e-12
LTR	ERVL-MaLR	MLT1A	chr20	27404440	27404608	168	-	48	0	49	8.0086e-13
LTR	ERVL-MaLR	ORR1D2	chr14	66429191	66429349	158	-	48	0	49	1.156e-12
LTR	ERVL	RatERVL	chr7	63132975	63133126	151	-	48	0	49	8.11574e-13
SINE	Alu	B1_Mur1	chr4	57336651	57336793	142	-	47.9532	0	48.9532	8.76105e-13
SINE	Alu	B1_Mur1	chr5	59698892	59699033	141	-	47.9474	0	48.9474	1.38166e-12
SINE	B4	B4A	chr7	101190086	101190232	146	+	47.9228	0	48.9228	1.14946e-12
SINE	B2	B3	chr11	34876295	34876516	221	-	47.9167	0	48.9167	8.38609e-13
SINE	B2	B3A	chr15	103982436	103982610	174	-	47.9007	0	48.9007	8.51168e-13
SINE	B4	RSINE1	chr5	94542607	94542734	127	+	47.7284	0	48.7284	8.4843e-13
SINE	B4	RSINE1	chr12	34148368	34148446	78	-	47.7216	0	48.7216	2.95345e-12
LTR	ERVL-MaLR	MTD	chr3	34393082	34393307	225	-	47.6466	0	48.6466	7.37279e-13
LTR	ERVK	RNLTR15A2	chr3	154825701	154825973	272	-	248.857	4.14	48.6103	8.17876e-13
SINE	B2	B3A	chr8	45991638	45991796	158	+	47.5923	0	48.5923	8.63271e-13
SINE	B2	B3A	chr10	9436397	9436586	189	+	47.59	0	48.59	6.51263e-13
SINE	B4	B4A	chr8	108655285	108655475	190	+	47.531	0	48.531	1.18637e-12
SINE	B2	B3	chr10	46605257	46605421	164	+	47.4907	0	48.4907	8.32197e-13
DNA	hAT-Tip100	MER115	chr1	40534016	40534199	183	+	47.4808	0	48.4808	1.21767e-12
SINE	B4	B4A	chr2	29121240	29121511	271	-	75.911	0.586499	48.4784	7.49884e-13
SINE	B4	B4A	chr2	29122119	29122390	271	-	75.911	0.586499	48.4784	7.49884e-13
LTR	ERVK	RLTR16	chr20	43559168	43559358	190	-	47.4687	0	48.4687	9.25726e-13
SINE	B4	B4	chr7	49984278	49984546	268	+	54.6021	0.147857	48.4399	7.90335e-13
SINE	B4	B4	chr10	9610091	9610301	210	+	47.3766	0	48.3766	1.42193e-12
SINE	B4	B4	chr10	39742871	39743075	204	-	47.3103	0	48.3103	1.97023e-12
SINE	B4	B4A	chr11	11388869	11389054	185	-	47.3077	0	48.3077	8.3436e-13
LTR	ERVK	RNLTR15A2	chr7	110536421	110536552	131	-	47.3076	0	48.3076	1.32521e-12
LTR	ERVL-MaLR	ORR1D-int	chr7	63133132	63133257	125	-	47.2618	0	48.2618	8.11574e-13
SINE	B4	RSINE1	chr7	140952778	140952954	176	+	47.2606	0	48.2606	7.61521e-13
LTR	ERVK	RMER12	chr4	134499368	134499459	91	-	47.1588	0	48.1588	2.14311e-12
SINE	B2	B3	chr4	10535371	10535570	199	+	47.1218	0	48.1218	7.52045e-13
SINE	B2	B3A	chr5	144382979	144383134	155	-	47.1028	0	48.1028	8.96328e-13
SINE	B2	B3A	chr16	37899588	37899724	136	-	47.0716	0	48.0716	5.09333e-13
SINE	B2	B3	chr16	54389886	54390058	172	+	47.0543	0	48.0543	1.32819e-12
SINE	Alu	PB1D9	chr2	182756926	182757039	113	+	47.0526	0	48.0526	6.25976e-12
SINE	B2	B3A	chr11	36359997	36360159	162	+	47.0471	0	48.0471	7.97473e-13
SINE	Alu	PB1D10	chr6	135592519	135592626	107	-	47.0385	0	48.0385	2.63827e-12
SINE	B2	B3	chr8	100581927	100582106	179	+	47.0303	0	48.0303	8.09525e-13
SINE	B2	B3A	chr19	24789697	24789929	232	-	47.0294	0	48.0294	7.58575e-13
SINE	B2	B3	chr8	114972830	114973038	208	-	47.0292	0	48.0292	7.97954e-13
SINE	B2	B3A	chr4	90851227	90851397	170	-	47.0185	0	48.0185	8.29368e-13
SINE	B4	B4	chr15	330625	330843	218	-	47.0088	0	48.0088	8.34004e-13
SINE	B2	B3A	chr12	26875387	26875531	144	+	47	0	48	1.39471e-12
SINE	MIR	MIR3	chr3	156004621	156004754	133	+	47	0	48	1.05566e-12
SINE	Alu	B1_Mur2	chr3	107734834	107734936	102	+	47	0	48	8.01908e-13
SINE	ID	ID4	chr11	69707575	69707642	67	-	47	0	48	1.86643e-12
SINE	B2	B2_Rat2	chr7	67367165	67367216	51	-	47	0	48	1.51358e-12
LTR	ERVL	MT2B2	chr10	74470560	74470701	141	-	47	0	48	9.25932e-13
LTR	ERVK	RNLTR15A2	chr1	210153240	210153284	44	-	47	0	48	2.54811e-12
Low_complexity	Low_complexity	AT_rich	chr8	44570093	44570116	23	+	47	0	48	1.34641e-12
SINE	B2	B3	chr1	88275857	88276064	207	+	46.9915	0	47.9915	8.24488e-13
SINE	B4	RSINE1	chr18	5109059	5109222	163	+	46.9732	0	47.9732	3.04607e-12
SINE	B2	B3A	chr5	144879558	144879717	159	-	64.2281	0.360681	47.9378	9.81139e-13
DNA	hAT-Charlie	URR1A	chr18	72364965	72365194	229	-	344.529	6.21	47.9236	1.24735e-11
SINE	B4	RSINE1	chr5	96321081	96321217	136	+	46.9092	0	47.9092	2.2822e-12
SINE	B4	B4A	chr3	166342982	166343181	199	-	46.8153	0	47.8153	5.08565e-13
SINE	B4	RSINE1	chrX	48854820	48854958	138	+	46.7957	0	47.7957	1.27646e-12
SINE	B4	RSINE1	chr14	104006317	104006440	123	-	46.7546	0	47.7546	1.07016e-12
SINE	Alu	PB1D10	chr10	9330678	9330778	100	+	46.6938	0	47.6938	1.49208e-12
SINE	B2	B3	chr1	48861331	48861487	156	-	46.6738	0	47.6738	3.09644e-12
SINE	B2	B3A	chr6	3895292	3895445	153	-	46.6667	0	47.6667	9.30986e-13
SINE	B4	B4A	chr1	118995948	118996146	198	-	46.6478	0	47.6478	1.2699e-12
SINE	B4	B4A	chr13	40311350	40311562	212	+	46.5809	0	47.5809	1.04202e-12
SINE	Alu	PB1D10	chr3	153436716	153436835	119	+	46.5808	0	47.5808	8.40746e-13
SINE	Alu	PB1D9	chr2	182756754	182756874	120	-	46.5345	0	47.5345	6.25976e-12
DNA	TcMar-Tigger	MER82	chr1	119496015	119496203	188	-	46.5169	0	47.5169	9.17409e-13
SINE	B4	B4A	chr10	8521212	8521441	229	+	46.5	0	47.5	7.85459e-13
SINE	B4	RSINE1	chr19	14354441	14354556	115	-	46.5	0	47.5	1.32521e-12
DNA	TcMar-Tigger	Tigger7	chr1	227164477	227164577	100	-	46.5	0	47.5	1.49033e-12
SINE	B2	B3A	chr10	8961586	8961770	184	-	46.4499	0	47.4499	1.29942e-12
SINE	B4	RSINE1	chr5	61585713	61585809	96	-	46.439	0	47.439	1.2162e-12
SINE	B4	B4	chr2	214842671	214842860	189	-	242.822	4.14	47.4362	2.27922e-12
SINE	B4	B4A	chr17	64587150	64587312	162	-	46.3333	0	47.3333	9.11554e-13
SINE	B4	B4A	chr6	4457794	4458043	249	+	144.287	2.07	47.3248	7.82109e-13
SINE	B4	RSINE1	chr2	21805066	21805244	178	-	144.006	2.07	47.2332	1.4302e-12
SINE	B2	B3	chr14	104011683	104011789	106	-	46.2193	0	47.2193	2.07337e-12
SINE	B4	B4A	chr14	45393923	45394196	273	+	143.75	2.07	47.1498	3.41404e-12
SINE	B2	B3	chr7	21031997	21032139	142	+	46.1452	0	47.1452	5.73711e-13
SINE	B4	RSINE1	chr11	31775696	31775843	147	-	46.1297	0	47.1297	8.75142e-13
SINE	B4	B4A	chr11	11518939	11519156	217	-	46.1241	0	47.1241	7.75015e-13
SINE	MIR	MIRb	chr2	83620837	83620940	103	+	46.0826	0	47.0826	7.98824e-13
SINE	B2	B3	chr19	30481810	30481982	172	-	46.0768	0	47.0768	1.26289e-12
SINE	Alu	B1_Mur1	chr19	26249067	26249214	147	-	46.0559	0	47.0559	1.93906e-12
SINE	B4	B4A	chr16	17703529	17703735	206	+	46.0333	0	47.0333	1.93188e-12
SINE	B4	B4A	chr10	21442020	21442174	154	+	46.0222	0	47.0222	2.86023e-12
SINE	B4	ID_B1	chr5	148328217	148328331	114	+	46.0208	0	47.0208	8.24367e-13
SINE	B2	B3	chr8	47587092	47587262	170	-	46.0178	0	47.0178	7.32227e-13
SINE	B2	B3	chr10	21474301	21474428	127	-	143.292	2.07	47.0007	1.26878e-12
SINE	B4	B4A	chr3	118299179	118299389	210	-	46	0	47	8.53165e-13
SINE	B2	B3	chr4	96927719	96927912	193	-	46	0	47	1.99667e-12
SINE	B4	B4A	chr2	123563609	123563800	191	-	46	0	47	1.73403e-12
SINE	B2	B3A	chr14	100721336	100721523	187	-	46	0	47	9.22067e-13
SINE	B4	B4	chr2	32662395	32662574	179	+	46	0	47	8.26782e-13
SINE	Alu	B1_Mur1	chr12	46692192	46692336	144	+	46	0	47	1.78268e-12
SINE	B4	RSINE1	chr7	137268091	137268217	126	+	46	0	47	1.70689e-12
SINE	B2	B3	chr4	173141388	173141497	109	-	46	0	47	8.75142e-13
SINE	B2	B3A	chr12	25092682	25092787	105	+	46	0	47	1.23845e-12
SINE	B4	RSINE1	chr18	8191668	8191765	97	+	46	0	47	1.38496e-12
DNA	hAT-Charlie	Charlie8	chr3	76182271	76182460	189	+	46	0	47	7.42329e-13
SINE	Alu	B1_Rn	chr7	14116375	14116507	132	-	45.9588	0	46.9588	8.68737e-13
SINE	B4	RSINE1	chr10	54222068	54222226	158	-	45.9424	0	46.9424	8.56432e-13
SINE	B2	B3A	chr4	146820584	146820732	148	+	45.7976	0	46.7976	8.61143e-13
SINE	Alu	B1_Mur3	chr20	31471043	31471197	154	-	45.762	0	46.762	5.3561e-12
SINE	B2	B3A	chr7	12897092	12897254	162	+	45.7592	0	46.7592	9.91415e-13
SINE	Alu	PB1D10	chr15	105083847	105083927	80	+	45.7568	0	46.7568	1.58694e-12
SINE	B4	ID_B1	chr2	234219999	234220067	68	-	53.1698	0.159231	46.7291	7.9732e-13
SINE	MIR	MIR	chr4	130794023	130794239	216	+	142.333	2.07	46.6883	9.81139e-13
SINE	MIR	MIRb	chr3	59368354	59368521	167	-	45.6667	0	46.6667	9.03345e-13
SINE	B4	RSINE1	chr8	55160723	55160810	87	-	45.6618	0	46.6618	1.1564e-12
SINE	MIR	MIRb	chr17	85017116	85017209	93	+	45.6603	0	46.6603	3.47663e-12
SINE	B4	B4	chr1	174079007	174079171	164	+	45.6581	0	46.6581	7.45462e-13
SINE	B4	RSINE1	chr6	41786435	41786599	164	-	55.2992	0.207	46.6439	1.51952e-12
SINE	B4	RSINE1	chr8	10252628	10252759	131	-	45.5838	0	46.5838	8.16656e-13
SINE	Alu	PB1D10	chr1	78283169	78283289	120	-	45.5455	0	46.5455	9.10532e-13
SINE	B4	B4	chr9	84988455	84988667	212	-	45.5268	0	46.5268	8.19507e-13
SINE	B4	RSINE1	chr3	108148381	108148542	161	+	45.5152	0	46.5152	7.98087e-13
SINE	B4	B4	chr19	57487052	57487209	157	-	45.5	0	46.5	1.19403e-12
SINE	B4	RSINE1	chr10	66932222	66932370	148	-	45.4974	0	46.4974	9.75623e-13
SINE	Alu	B1_Mur4	chr13	40306211	40306360	149	+	45.4972	0	46.4972	7.7734e-13
SINE	B4	ID_B1	chr6	59746862	59747084	222	-	45.474	0	46.474	9.19628e-13
SINE	B4	RSINE1	chr4	6724543	6724701	158	+	45.4119	0	46.4119	7.97457e-13
LTR	ERVL-MaLR	MTE2b	chr4	146747591	146747798	207	+	45.4065	0	46.4065	7.39088e-13
SINE	B2	B3A	chr17	71805867	71805941	74	+	45.3368	0	46.3368	2.07803e-12
SINE	B2	B3	chr19	53303842	53304033	191	+	45.3274	0	46.3274	8.63761e-13
LINE	L2	L2	chr5	130275764	130275902	138	-	50.3608	0.108947	46.3149	5.45096e-13
LTR	ERVL-MaLR	MLT1F2	chr13	75173318	75173496	178	-	45.2847	0	46.2847	8.16483e-13
SINE	B4	RSINE1	chr17	63042293	63042400	107	-	45.2833	0	46.2833	1.0436e-11
LTR	ERVL-MaLR	ORR1A4	chr20	31369882	31370207	325	-	66.5273	0.46	46.2516	7.37279e-13
SINE	B2	B3	chr2	39093114	39093325	211	+	45.2227	0	46.2227	8.04099e-13
SINE	B4	B4	chr17	85201587	85201785	198	+	268.463	4.82999	46.2201	2.27705e-12
SINE	B4	B4A	chr4	161226385	161226556	171	-	45.2106	0	46.2106	1.42522e-12
SINE	MIR	MIRb	chr12	26875098	26875220	122	+	45.1852	0	46.1852	1.39471e-12
SINE	Alu	PB1D10	chr18	66034812	66034883	71	-	45.1	0	46.1	1.1564e-12
SINE	Alu	B1_Mur2	chr15	32725165	32725270	105	+	45.0714	0	46.0714	1.31224e-12
SINE	B2	B3	chr5	156970941	156971129	188	-	45.0707	0	46.0707	1.40828e-12
SINE	B2	B3A	chr16	37897873	37898011	138	-	45.0621	0	46.0621	5.09333e-13
SINE	B4	RSINE1	chr17	15608981	15609102	121	-	45.0238	0	46.0238	7.80356e-13
SINE	Alu	PB1D10	chr2	143951929	143952014	85	-	45.0175	0	46.0175	1.3689e-12
SINE	B2	B3A	chr6	14694252	14694462	210	-	45	0	46	8.01996e-13
SINE	B2	B3	chr12	27794442	27794645	203	+	45	0	46	8.3103e-13
SINE	B2	B3A	chr1	219283895	219284095	200	+	45	0	46	3.11975e-12
SINE	B2	B3	chr8	85156723	85156892	169	-	45	0	46	7.45041e-13
SINE	Alu	B1_Mur1	chr4	173141170	173141319	149	-	45	0	46	8.75142e-13
SINE	ID	ID_Rn2	chr11	60797064	60797160	96	+	45	0	46	7.99677e-13
SINE	Alu	PB1D7	chr6	76067572	76067643	71	+	45	0	46	1.14254e-12
LTR	ERVL-MaLR	MLT1H2	chr17	82300934	82301120	186	-	45	0	46	1.33431e-12
Low_complexity	Low_complexity	AT_rich	chr8	26958625	26958649	24	+	45	0	46	3.06207e-12
SINE	Alu	B1_Mur4	chr3	8841234	8841373	139	-	44.8885	0	45.8885	8.12592e-13
SINE	B2	B3	chr10	59640451	59640654	203	-	44.8046	0	45.8046	1.51194e-12
SINE	Alu	B1_Mur2	chr18	55036862	55037012	150	-	44.7	0	45.7	9.25808e-13
SINE	ID	BC1_Rn	chr12	5010610	5010718	108	-	44.6823	0	45.6823	2.19294e-12
SINE	B4	RSINE1	chr15	330476	330623	147	-	44.6818	0	45.6818	8.34004e-13
SINE	Alu	PB1D10	chr8	62399469	62399572	103	+	44.6741	0	45.6741	1.28589e-12
SINE	Alu	PB1D7	chr16	17849388	17849474	86	-	44.6621	0	45.6621	4.98058e-12
LTR	ERVK	RLTR11B	chr7	55893158	55893340	182	+	44.627	0	45.627	2.66265e-12
SINE	B4	RSINE1	chr7	58899275	58899407	132	-	44.6215	0	45.6215	1.78225e-12
SINE	B4	B4A	chr16	77512362	77512663	301	-	327.5	6.21	45.5617	5.91134e-12
SINE	B4	RSINE1	chr1	156653484	156653611	127	-	44.5524	0	45.5524	1.52428e-12
LTR	ERVK	RNLTR15A	chr12	25393615	25393749	134	-	157.655	2.484	45.5382	2.50978e-12
SINE	B4	RSINE1	chr6	73570761	73570887	126	-	44.5333	0	45.5333	1.10914e-12
SINE	MIR	MIR3	chr6	15349464	15349528	64	+	44.5215	0	45.5215	7.82109e-13
SINE	B4	RSINE1	chr1	207894043	207894187	144	+	44.5161	0	45.5161	8.64619e-13
SINE	B2	B3	chr5	77848583	77848761	178	+	44.5	0	45.5	1.17335e-12
SINE	B4	RSINE1	chr5	172377005	172377121	116	-	44.5	0	45.5	1.38042e-12
LTR	ERVL-MaLR	MLT1H2	chr13	36554398	36554497	99	-	44.4016	0	45.4016	2.04055e-12
SINE	B4	B4A	chr19	16855109	16855203	94	+	44.3818	0	45.3818	1.16646e-12
SINE	B4	B4	chr1	90475968	90476054	86	+	44.3532	0	45.3532	7.62732e-13
DNA	hAT-Charlie	URR1B	chr10	72331089	72331298	209	-	44.3522	0	45.3522	1.31447e-12
SINE	Alu	B1F2	chr8	46115161	46115290	129	+	44.3509	0	45.3509	8.24276e-13
SINE	B2	B3A	chr19	35103068	35103260	192	+	44.2991	0	45.2991	9.53251e-13
SINE	B2	B3A	chr5	129604174	129604354	180	-	44.2693	0	45.2693	1.09506e-12
SINE	B2	B3A	chr9	67868322	67868439	117	+	44.2597	0	45.2597	8.61143e-13
SINE	B4	B4	chr8	93666809	93666970	161	+	44.25	0	45.25	2.18894e-12
SINE	B2	B3	chr7	111080161	111080380	219	+	44.228	0	45.228	8.24368e-13
SINE	B2	B3	chr12	21673446	21673589	143	+	44.1887	0	45.1887	2.96272e-08
SINE	B2	B3	chr6	123702929	123703148	219	+	44.1445	0	45.1445	8.53809e-13
SINE	Alu	B1F1	chr1	182951564	182951690	126	-	44.0959	0	45.0959	1.42115e-12
SINE	B4	B4A	chr6	73598790	73598906	116	-	44.0894	0	45.0894	1.96131e-12
SINE	B4	RSINE1	chr10	38835248	38835338	90	-	44.0872	0	45.0872	3.40624e-12
SINE	Alu	B1_Rn	chr1	26090906	26091031	125	-	44.0799	0	45.0799	8.50198e-13
LTR	ERVL-MaLR	MLT1B	chr1	118972799	118972944	145	-	44.0478	0	45.0478	7.68286e-13
SINE	ID	ID_Rn1	chr10	76065872	76065968	96	-	44.0435	0	45.0435	1.57392e-11
SINE	B2	B3	chr7	11418500	11418667	167	+	44.0432	0	45.0432	7.09152e-13
SINE	B2	B3A	chr19	48613297	48613462	165	-	90.6101	1.035	45.0172	1.34401e-12
SINE	B4	RSINE1	chr6	126168434	126168615	181	+	44.0122	0	45.0122	7.98713e-13
LTR	ERVL	RMER15	chr1	38365696	38365857	161	+	44.0116	0	45.0116	8.71514e-13
SINE	MIR	MIRb	chr16	25311025	25311172	147	-	44.0111	0	45.0111	8.16656e-13
SINE	MIR	MIRb	chr4	130706636	130706851	215	-	44	0	45	7.86403e-13
SINE	B2	B3A	chr20	12570183	12570395	212	+	44	0	45	3.91851e-12
SINE	B4	B4A	chr15	54226385	54226578	193	-	44	0	45	8.38521e-13
SINE	B2	B3	chr1	44950388	44950577	189	-	44	0	45	8.61143e-13
SINE	B2	B3A	chr13	35993398	35993569	171	+	44	0	45	1.25268e-12
SINE	Alu	PB1D10	chr7	74374446	74374588	142	+	44	0	45	2.23075e-12
SINE	B2	B3	chr1	143939751	143939889	138	-	44	0	45	4.46836e-12
SINE	Alu	B1F	chr12	45838243	45838378	135	-	44	0	45	7.37279e-13
SINE	B4	ID_B1	chr3	161430252	161430386	134	-	44	0	45	1.38275e-12
SINE	B4	RSINE1	chr3	120661952	120662085	133	-	44	0	45	2.22352e-12
SINE	Alu	PB1D10	chr1	82878543	82878673	130	+	44	0	45	3.28189e-12
SINE	Alu	B1_Mur1	chr14	45401258	45401374	116	+	44	0	45	3.55766e-12
SINE	B4	B4	chr1	175553148	175553253	105	+	44	0	45	7.97353e-13
SINE	B4	ID_B1	chr14	85164648	85164748	100	+	44	0	45	8.10004e-13
LTR	ERVL-MaLR	MTB	chr1	185188979	185189144	165	+	44	0	45	8.06429e-13
DNA	hAT-Charlie	Charlie7	chr15	57444012	57444212	200	-	44	0	45	1.26463e-12
LINE	CR1	L3	chr1	147947793	147948114	321	+	230.25	4.14	44.9903	1.94674e-12
SINE	B2	B3	chr6	127244333	127244530	197	-	43.9601	0	44.9601	9.77608e-13
SINE	B2	B3A	chr16	37881206	37881343	137	-	43.9569	0	44.9569	5.09333e-13
SINE	B2	B3A	chr5	8620803	8620831	28	+	43.9365	0	44.9365	1.94647e-12
SINE	B4	RSINE1	chr6	119594965	119595115	150	-	43.934	0	44.934	8.75142e-13
SINE	B4	RSINE1	chr1	77160402	77160568	166	+	43.9333	0	44.9333	9.00182e-13
SINE	Alu	B1_Mur3	chr7	10952064	10952226	162	+	43.8853	0	44.8853	3.11455e-12
SINE	B2	B3A	chr10	105649444	105649575	131	-	43.8284	0	44.8284	8.0016e-13
SINE	B2	B3A	chr16	37900637	37900776	139	-	43.7589	0	44.7589	5.09333e-13
SINE	B2	B3	chr5	28267760	28267971	211	-	43.7381	0	44.7381	1.54934e-12
SINE	B4	RSINE1	chr3	156004047	156004166	119	-	43.7249	0	44.7249	1.05566e-12
SINE	B4	RSINE1	chr14	23670710	23670861	151	-	43.7141	0	44.7141	1.84555e-12
SINE	B4	ID_B1	chr19	24876827	24876975	148	-	43.667	0	44.667	1.43474e-12
SINE	B4	RSINE1	chr19	53430717	53430817	100	+	43.6043	0	44.6043	1.43451e-12
SINE	B4	B4A	chr16	78348244	78348483	239	-	63.0296	0.437	44.5578	1.12457e-12
SINE	Alu	B1_Mur4	chr6	21111166	21111301	135	+	43.5381	0	44.5381	6.20152e-13
SINE	B4	ID_B1	chr17	71805768	71805866	98	+	43.5294	0	44.5294	2.07803e-12
SINE	B2	B3A	chrX	48815377	48815557	180	+	43.5247	0	44.5247	1.32709e-12
SINE	B2	B3	chr8	72357827	72358041	214	-	43.5	0	44.5	2.84495e-10
SINE	B4	B4	chr3	143704845	143704998	153	-	43.5	0	44.5	8.01329e-13
SINE	MIR	MIRb	chr8	47664988	47665136	148	+	43.5	0	44.5	1.74871e-12
SINE	Alu	B1_Mur1	chr10	103505037	103505153	116	-	43.5	0	44.5	8.09735e-13
SINE	B4	RSINE1	chr1	246947732	246947817	85	+	58.8482	0.345001	44.4968	1.40974e-12
SINE	B2	B3	chr15	93030468	93030614	146	+	43.459	0	44.459	3.01414e-12
SINE	B4	ID_B1	chr14	29103372	29103542	170	+	43.4518	0	44.4518	8.1497e-13
SINE	B2	B3	chr12	10086551	10086706	155	+	43.4492	0	44.4492	2.86495e-12
SINE	B4	B4	chr2	192604221	192604432	211	+	43.4127	0	44.4127	1.61787e-12
SINE	B4	B4A	chr14	66785922	66786168	246	-	135.282	2.07	44.3915	2.26691e-12
DNA	hAT-Charlie	MER58B	chrX	46893448	46893655	207	+	43.3833	0	44.3833	1.27785e-12
SINE	B2	B3A	chr16	37877065	37877193	128	-	43.3642	0	44.3642	5.09333e-13
SINE	Alu	B1_Mur3	chr2	147888987	147889124	137	-	43.3455	0	44.3455	7.35351e-13
SINE	B4	B4A	chr17	68599944	68600102	158	-	43.3333	0	44.3333	7.81487e-13
SINE	B4	RSINE1	chr8	92316468	92316618	150	-	43.3165	0	44.3165	1.38387e-12
SINE	B2	B3A	chr7	120988665	120988836	171	+	43.3139	0	44.3139	2.24648e-12
SINE	Alu	B1_Mur3	chr10	65652106	65652251	145	+	43.3107	0	44.3107	8.52533e-13
SINE	B2	B3A	chr7	58764889	58765106	217	+	135	2.07	44.2997	2.37589e-12
SINE	B4	B4A	chr6	88719279	88719411	132	+	43.268	0	44.268	9.46073e-13
SINE	B4	RSINE1	chr17	55153505	55153678	173	-	43.2679	0	44.2679	8.90525e-13
SINE	B4	RSINE1	chr16	10726336	10726457	121	-	43.2218	0	44.2218	8.07576e-13
SINE	B4	B4A	chr18	30307156	30307291	135	-	43.1698	0	44.1698	1.23734e-12
SINE	B4	B4A	chr1	231584289	231584553	264	+	226.032	4.14	44.1696	3.96886e-12
SINE	B2	B3A	chr13	36663912	36664069	157	+	43.1521	0	44.1521	7.9732e-13
SINE	B4	B4	chr10	107050417	107050462	45	+	43.1275	0	44.1275	7.8302e-13
SINE	B2	B2_Rat3	chrX	93972893	93973069	176	+	43.1068	0	44.1068	7.97705e-13
Low_complexity	Low_complexity	AT_rich	chr10	21660793	21660854	61	+	43.1009	0	44.1009	2.25627e-12
SINE	Alu	B1F2	chr1	210220616	210220689	73	-	43.0627	0	44.0627	1.42291e-12
SINE	Alu	PB1D10	chr11	82784746	82784856	110	+	43.0606	0	44.0606	8.37121e-13
SINE	B2	B3A	chr5	65337230	65337432	202	-	43.0583	0	44.0583	7.97314e-13
LTR	ERVK	RLTR12B	chr11	74004365	74004515	150	+	43.0333	0	44.0333	1.81376e-12
SINE	B2	B3	chr17	59442881	59443093	212	+	43.0325	0	44.0325	7.76399e-13
SINE	ID	ID_Rn1	chr11	10839541	10839637	96	+	43.0217	0	44.0217	8.02879e-13
SINE	B4	RSINE1	chr6	93285123	93285282	159	-	43.02	0	44.02	8.89676e-13
SINE	B4	ID_B1	chr6	71780912	71781120	208	+	43	0	44	8.16656e-13
SINE	B2	B3A	chr2	29491484	29491688	204	+	43	0	44	9.70077e-13
SINE	B2	B3	chr7	58875467	58875671	204	+	43	0	44	9.74673e-13
SINE	B2	B3A	chr3	108574197	108574383	186	+	43	0	44	8.00528e-13
SINE	B2	B3A	chr10	37253786	37253968	182	+	43	0	44	5.67239e-13
SINE	B2	B3A	chr6	144550179	144550343	164	-	43	0	44	1.19365e-12
SINE	Alu	B1F1	chr5	138900518	138900657	139	-	43	0	44	2.09158e-12
SINE	Alu	B1_Rn	chr14	45402176	45402314	138	-	43	0	44	3.55766e-12
SINE	Alu	PB1D9	chr10	68615371	68615481	110	-	43	0	44	1.72166e-12
SINE	MIR	MIR	chr13	83993509	83993602	93	+	43	0	44	3.06207e-12
SINE	MIR	MIR	chr14	82544320	82544407	87	-	43	0	44	2.12686e-12
SINE	MIR	MIRb	chr16	10777616	10777697	81	-	43	0	44	9.60962e-13
SINE	B4	RSINE1	chr1	88259460	88259500	40	+	43	0	44	9.03998e-13
rRNA	rRNA	5S	chr1	249964706	249964827	121	+	43	0	44	1.28941e-12
LTR	ERVL-MaLR	MLT1A0	chrX	92165719	92165866	147	+	43	0	44	8.25813e-13
LTR	ERVL-MaLR	MTEa	chr11	60039091	60039196	105	-	43	0	44	7.98373e-13
LTR	ERVL-MaLR	ORR1E	chr4	111350094	111350195	101	-	43	0	44	1.41813e-12
LINE	L2	L2	chr3	149480102	149480278	176	-	43	0	44	2.5565e-12
LINE	CR1	L3	chr4	16067301	16067445	144	+	43	0	44	7.82109e-13
SINE	B2	B3A	chr16	37895682	37895830	148	-	42.9823	0	43.9823	5.09333e-13
DNA	hAT-Charlie	MER58B	chr12	25345015	25345353	338	-	134	2.07	43.9739	1.41848e-12
SINE	B4	B4A	chr3	132989503	132989675	172	-	42.9131	0	43.9131	8.55622e-13
SINE	B2	B3A	chr1	119068413	119068590	177	-	42.9004	0	43.9004	1.08397e-12
SINE	B2	B3A	chr1	99073750	99073910	160	-	42.8927	0	43.8927	9.24613e-13
SINE	B2	B3A	chr7	106602646	106602802	156	-	42.8365	0	43.8365	8.00827e-13
SINE	ID	ID4	chr4	44123187	44123245	58	+	42.8118	0	43.8118	1.59641e-12
SINE	B2	B3A	chr7	47536795	47536949	154	+	42.8081	0	43.8081	1.14621e-12
RNA	RNA	7SK	chr10	21482504	21482717	213	-	351.064	7.038	43.8	1.26878e-12
SINE	B4	RSINE1	chr17	83420918	83421082	164	-	42.779	0	43.779	8.67948e-13
SINE	B4	B4A	chr11	11508653	11508844	191	-	53.9759	0.25875	43.675	8.01329e-13
SINE	B2	B3A	chr16	37877265	37877402	137	-	42.673	0	43.673	5.09333e-13
SINE	B4	RSINE1	chr7	114845902	114846029	127	+	42.665	0	43.665	1.23712e-12
SINE	B4	B4A	chr1	183075858	183076156	298	-	132.962	2.07	43.6358	1.92075e-12
SINE	B4	RSINE1	chr15	50989562	50989715	153	+	42.5909	0	43.5909	1.99974e-12
SINE	B2	B3	chr1	67866123	67866333	210	+	42.5749	0	43.5749	1.70484e-12
SINE	B4	B4	chr16	6432973	6433157	184	-	42.5625	0	43.5625	1.24626e-12
SINE	B4	RSINE1	chr6	23965770	23965934	164	+	42.5543	0	43.5543	8.17811e-13
LINE	L2	L2	chr2	23612742	23612873	131	-	42.5491	0	43.5491	7.99187e-13
DNA	hAT-Charlie	MER5A	chr1	168795564	168795650	86	-	42.5208	0	43.5208	1.97457e-12
SINE	B4	RSINE1	chr1	246878865	246879009	144	+	42.5174	0	43.5174	8.55726e-13
SINE	Alu	B1_Mur3	chr5	142959789	142959906	117	-	42.5093	0	43.5093	3.76125e-12
SINE	B2	B3A	chr3	89072475	89072627	152	+	87.5328	1.035	43.5051	8.12572e-13
SINE	B2	B3A	chr19	41142635	41142802	167	+	42.5	0	43.5	9.11554e-13
SINE	B4	RSINE1	chr8	28996828	28996985	157	+	42.5	0	43.5	8.75142e-13
SINE	B4	RSINE1	chr7	136399080	136399217	137	+	42.5	0	43.5	7.82109e-13
SINE	Alu	B1F1	chr8	114451277	114451352	75	+	42.5	0	43.5	1.23845e-12
SINE	B2	B3A	chr6	14976239	14976435	196	-	42.4939	0	43.4939	7.24826e-13
SINE	B4	RSINE1	chr14	80221142	80221284	142	-	42.3856	0	43.3856	4.43874e-12
SINE	B2	B3A	chr5	20547234	20547367	133	+	42.3465	0	43.3465	8.21362e-13
SINE	B2	B3A	chr17	82282307	82282494	187	-	42.329	0	43.329	8.19584e-13
SINE	B4	RSINE1	chr7	76351500	76351672	172	-	42.3196	0	43.3196	1.42058e-12
SINE	B4	RSINE1	chr4	121015997	121016124	127	-	42.3036	0	43.3036	8.58505e-13
SINE	B4	RSINE1	chr8	112161997	112162120	123	+	42.289	0	43.289	1.17387e-12
SINE	B4	ID_B1	chr10	59763001	59763099	98	-	42.2744	0	43.2744	1.15285e-12
SINE	B2	B3A	chr17	15036906	15037077	171	+	42.2452	0	43.2452	9.29144e-13
LTR	ERVL-MaLR	MTEb	chr1	159480332	159480475	143	-	42.2103	0	43.2103	8.77162e-13
SINE	B4	B4	chr13	36903921	36904114	193	+	176.334	3.105	43.1995	1.49151e-12
LTR	ERVL-MaLR	MTD	chr3	34392891	34393041	150	-	42.1869	0	43.1869	7.37279e-13
SINE	B4	ID_B1	chr2	124042551	124042738	187	+	42.1774	0	43.1774	5.09934e-13
SINE	B2	B3A	chr15	59765021	59765144	123	+	42.1686	0	43.1686	8.46618e-13
SINE	B4	RSINE1	chr19	22458436	22458590	154	+	42.16	0	43.16	7.82109e-13
SINE	Alu	B1_Mur3	chr6	10445497	10445623	126	+	42.1438	0	43.1438	1.49962e-12
SINE	B4	B4	chr12	25851719	25851903	184	-	42.1125	0	43.1125	7.51437e-13
SINE	Alu	PB1D10	chr17	55265427	55265492	65	-	42.0976	0	43.0976	7.97489e-13
SINE	B4	B4A	chr11	20481975	20482213	238	-	131.174	2.07	43.0534	1.28589e-12
SINE	B2	B3	chr14	36551242	36551451	209	-	42.0526	0	43.0526	3.68976e-12
SINE	B4	RSINE1	chr14	43787531	43787666	135	+	42.048	0	43.048	7.78115e-13
SINE	Alu	B1F1	chr10	106257011	106257116	105	-	42.0476	0	43.0476	1.76304e-12
SINE	B4	RSINE1	chr1	64086218	64086370	152	+	42.0434	0	43.0434	2.11934e-12
SINE	B2	B3A	chr8	49001718	49001850	132	-	42.0312	0	43.0312	9.56336e-13
SINE	B2	B3A	chr14	104295873	104296058	185	-	42.0303	0	43.0303	8.08046e-13
SINE	B4	RSINE1	chr5	127878674	127878842	168	+	67.4616	0.591428	43.019	1.03292e-12
SINE	Alu	B1F	chr17	84823229	84823350	121	+	42.015	0	43.015	8.28556e-13
SINE	MIR	MIR	chr3	157860550	157860691	141	+	42.0137	0	43.0137	1.1564e-12
SINE	B4	B4A	chr10	3055413	3055622	209	-	42	0	43	8.17264e-13
SINE	B2	B3	chr17	11118687	11118887	200	-	42	0	43	2.12242e-12
SINE	B2	B3	chr4	7538599	7538794	195	-	42	0	43	8.24505e-13
SINE	Alu	PB1D7	chr4	148589393	148589519	126	+	42	0	43	1.42527e-12
SINE	Alu	PB1D7	chr1	263316802	263316921	119	+	42	0	43	8.30338e-13
SINE	Alu	PB1D9	chr18	26966155	26966266	111	+	42	0	43	7.82109e-13
SINE	ID	ID_Rn2	chr2	232961083	232961190	107	+	42	0	43	7.98824e-13
SINE	MIR	MIR	chr2	111582276	111582376	100	+	42	0	43	2.23978e-12
SINE	MIR	MIRb	chr17	82985238	82985333	95	-	42	0	43	2.57629e-12
SINE	Alu	PB1D10	chr7	111043645	111043740	95	+	42	0	43	1.87668e-12
SINE	B2	B3	chr10	96557350	96557432	82	+	42	0	43	8.05045e-13
SINE	Alu	B1_Mur4	chr2	89849569	89849646	77	-	42	0	43	8.20309e-13
LTR	ERVL-MaLR	ORR1E	chr19	12485876	12486038	162	+	41.9881	0	42.9881	8.17627e-13
SINE	B4	RSINE1	chr15	43676688	43676846	158	+	41.983	0	42.983	9.23012e-13
SINE	B4	B4	chr1	149049873	149050157	284	-	130.823	2.07	42.9391	8.56085e-13
SINE	B4	ID_B1	chr9	42748630	42748805	175	+	41.8796	0	42.8796	2.70479e-12
SINE	B2	B3	chr4	146462943	146463092	149	-	130.597	2.07	42.8655	7.39753e-12
SINE	B2	B3	chr10	15274146	15274302	156	+	41.7961	0	42.7961	1.19071e-12
SINE	B4	B4A	chr17	93093790	93093917	127	+	41.7829	0	42.7829	1.42692e-12
SINE	B2	B3A	chr16	37898331	37898459	128	-	41.7675	0	42.7675	5.09333e-13
SINE	B4	B4	chr1	175769089	175769340	251	-	88.8987	1.104	42.7275	7.37279e-13
SINE	B4	RSINE1	chr3	9318501	9318628	127	-	41.7235	0	42.7235	1.39005e-12
SINE	B2	B2_Rat1	chr11	13644006	13644158	152	+	41.6922	0	42.6922	8.07605e-13
SINE	B2	B3A	chr16	37888909	37889115	206	-	41.6856	0	42.6856	5.09333e-13
SINE	B4	B4A	chr5	142773911	142774205	294	+	130	2.07	42.671	1.17484e-12
SINE	B4	ID_B1	chr6	9754311	9754474	163	-	41.6047	0	42.6047	7.82109e-13
SINE	B4	B4A	chr4	146747192	146747367	175	+	41.5909	0	42.5909	7.39088e-13
DNA	hAT-Charlie	MER3	chr13	45629183	45629325	142	-	41.5333	0	42.5333	1.51551e-12
LTR	ERVL-MaLR	MTE2a	chr1	175761711	175761856	145	+	41.523	0	42.523	8.61143e-13
SINE	B4	RSINE1	chr19	41486706	41486811	105	-	41.519	0	42.519	1.25717e-12
LTR	ERVL	RMER10B	chr5	137231619	137231806	187	-	41.5116	0	42.5116	8.08038e-13
SINE	B2	B3	chr10	85953463	85953662	199	+	41.5	0	42.5	7.37279e-13
SINE	B2	B3	chr1	245555369	245555564	195	+	41.5	0	42.5	8.78719e-13
SINE	B2	B2_Rat4	chr1	157734197	157734381	184	-	41.5	0	42.5	7.98824e-13
SINE	Alu	B1_Rn	chr4	58481184	58481319	135	+	41.5	0	42.5	2.44223e-12
SINE	Alu	B1F	chr1	231559861	231559989	128	-	41.5	0	42.5	1.41108e-12
SINE	B2	B3	chr10	13390728	13390846	118	+	41.5	0	42.5	2.20509e-12
SINE	B2	B3	chr4	182648212	182648352	140	+	41.4761	0	42.4761	1.35261e-12
SINE	B4	B4	chr1	82370657	82370730	73	-	41.4598	0	42.4598	4.7294e-08
SINE	B4	RSINE1	chr11	69707221	69707328	107	+	41.4573	0	42.4573	1.86643e-12
SINE	B2	B3A	chr18	73843029	73843225	196	-	41.4111	0	42.4111	4.96201e-13
tRNA	tRNA	tRNA-Ala-GCY_	chr17	26866578	26866638	60	+	41.4019	0	42.4019	9.31343e-13
SINE	B2	B3	chr9	88171148	88171330	182	-	41.3981	0	42.3981	7.51223e-13
SINE	B4	RSINE1	chr1	227170649	227170758	109	-	41.3969	0	42.3969	5.4106e-13
SINE	B2	B3	chr16	77258149	77258269	120	+	41.3786	0	42.3786	9.10532e-13
LTR	ERVL-MaLR	MTD	chr4	67426908	67427009	101	+	41.3713	0	42.3713	1.38496e-12
SINE	B4	RSINE1	chr1	76462607	76462777	170	-	41.3438	0	42.3438	8.23462e-13
SINE	B4	B4	chr17	85103308	85103538	230	+	85.152	1.035	42.3351	3.00224e-12
SINE	MIR	MIRb	chr1	209319747	209319862	115	+	41.3333	0	42.3333	1.42527e-12
SINE	ID	ID2	chrX	46893802	46893878	76	-	41.2945	0	42.2945	1.27785e-12
SINE	B4	B4A	chr5	16341066	16341210	144	-	41.2864	0	42.2864	9.11554e-13
SINE	B2	B3	chr10	107841509	107841679	170	-	41.2428	0	42.2428	9.32705e-13
SINE	B2	B3A	chr7	73088070	73088140	70	+	41.2333	0	42.2333	8.75142e-13
SINE	B4	B4	chr16	54328166	54328368	202	-	41.2	0	42.2	1.10752e-12
SINE	B2	B2_Rat3	chr11	33783513	33783667	154	-	41.1981	0	42.1981	1.38509e-12
SINE	B4	RSINE1	chr9	83462639	83462809	170	+	41.1911	0	42.1911	8.26555e-13
SINE	B2	B3A	chr10	37819175	37819342	167	-	41.1868	0	42.1868	1.08912e-12
SINE	B2	B3A	chr7	76564005	76564156	151	-	41.1616	0	42.1616	1.13407e-12
SINE	Alu	PB1D10	chr5	131314797	131314911	114	+	41.1429	0	42.1429	1.19896e-12
SINE	B2	B3	chr14	87045501	87045698	197	-	41.1111	0	42.1111	2.87735e-12
SINE	Alu	B1F1	chr15	50729059	50729205	146	-	41.0903	0	42.0903	7.37279e-13
SINE	B4	RSINE1	chr7	63084210	63084320	110	-	41.0833	0	42.0833	1.38873e-12
SINE	Alu	PB1D10	chr12	21534875	21534986	111	+	41.0374	0	42.0374	7.29189e-08
SINE	B4	RSINE1	chr9	61748312	61748449	137	+	41.0175	0	42.0175	1.27886e-12
SINE	B4	RSINE1	chr15	61540102	61540222	120	+	41.0111	0	42.0111	8.10004e-13
SINE	B2	B3A	chr1	158168869	158169051	182	-	41	0	42	8.30728e-13
SINE	MIR	MIR	chr1	66053739	66053914	175	-	41	0	42	7.86506e-13
SINE	MIR	MIR3	chr8	31766700	31766875	175	+	41	0	42	8.28556e-13
SINE	B4	B4A	chr13	36947154	36947320	166	+	41	0	42	1.31038e-12
SINE	B2	B3A	chr14	28707683	28707843	160	+	41	0	42	1.01424e-12
SINE	B2	B3A	chr2	115890559	115890715	156	-	41	0	42	1.25299e-12
SINE	B4	RSINE1	chr14	104348580	104348726	146	-	41	0	42	1.42212e-12
SINE	Alu	B1_Mur4	chr10	40274489	40274631	142	-	41	0	42	1.9757e-12
SINE	Alu	B1F1	chr8	85133098	85133237	139	+	41	0	42	1.1564e-12
SINE	MIR	MIR	chr10	38989601	38989730	129	+	41	0	42	8.38289e-13
SINE	Alu	B1F	chr5	142951823	142951947	124	+	41	0	42	1.32251e-12
SINE	Alu	B1_Mur4	chr10	57762862	57762979	117	+	41	0	42	1.42459e-12
SINE	Alu	PB1D10	chr7	114836226	114836334	108	-	41	0	42	9.81139e-13
SINE	Alu	PB1D10	chr2	111426838	111426945	107	+	41	0	42	9.99329e-13
SINE	Alu	B1F	chr2	176726793	176726888	95	-	41	0	42	1.4116e-12
SINE	B4	RSINE1	chr5	92100127	92100212	85	-	41	0	42	2.45071e-12
LTR	ERVL-MaLR	MLT1D	chr7	27716087	27716284	197	+	41	0	42	9.37582e-13
LTR	ERVL-MaLR	MTEb	chr2	255000639	255000805	166	-	41	0	42	2.96057e-12
LTR	ERVK	RMER12	chr4	110962874	110963035	161	-	41	0	42	1.29087e-12
LTR	ERVL	MT2B	chr4	961855	961992	137	-	41	0	42	9.66776e-13
LINE	L2	L2	chr7	63130133	63130309	176	-	41	0	42	8.11574e-13
SINE	B2	B3	chr3	18926975	18927151	176	+	40.9824	0	41.9824	8.28769e-13
SINE	B4	RSINE1	chr12	23345300	23345464	164	-	40.9438	0	41.9438	8.05169e-13
SINE	B2	B3A	chr6	26799871	26800027	156	-	40.9362	0	41.9362	8.6987e-13
SINE	B4	B4A	chr4	119059860	119060052	192	+	40.8971	0	41.8971	7.85673e-13
SINE	B2	B3A	chr4	6928918	6929064	146	-	40.8863	0	41.8863	7.87867e-13
SINE	B2	B3A	chr5	65280184	65280376	192	-	40.8714	0	41.8714	1.1112e-12
SINE	Alu	PB1D9	chr2	94277547	94277656	109	-	40.8541	0	41.8541	1.18852e-12
SINE	B4	ID_B1	chr19	24878280	24878378	98	-	40.8333	0	41.8333	1.43474e-12
SINE	B4	ID_B1	chr13	74584370	74584457	87	-	40.8333	0	41.8333	7.37279e-13
SINE	B2	B3A	chr12	28974389	28974564	175	-	40.7721	0	41.7721	3.46418e-12
SINE	B4	B4	chr14	5160920	5161182	262	+	213.602	4.14	41.7514	1.42527e-12
SINE	B2	B3A	chr6	59793826	59793909	83	-	40.6837	0	41.6837	8.78719e-13
SINE	B2	B3	chr5	2087110	2087285	175	-	230.449	4.554	41.6725	3.4875e-12
SINE	B2	B3A	chr1	263937283	263937457	174	-	40.6333	0	41.6333	7.82109e-13
SINE	B4	RSINE1	chr5	8543751	8543909	158	-	40.621	0	41.621	1.85611e-12
SINE	Alu	7SLRNA	chr2	256127513	256127623	110	+	40.5102	0	41.5102	7.82109e-13
SINE	B4	RSINE1	chr3	166351607	166351707	100	-	40.5097	0	41.5097	8.05178e-13
SINE	B2	B3	chr2	144604755	144604942	187	-	40.5	0	41.5	7.45512e-13
SINE	Alu	B1_Mur1	chr4	120179588	120179737	149	+	40.5	0	41.5	1.84852e-12
SINE	B2	B3A	chrX	94045578	94045711	133	+	40.5	0	41.5	2.40866e-12
Low_complexity	Low_complexity	AT_rich	chr18	72363959	72363998	39	+	40.5	0	41.5	8.59998e-12
SINE	Alu	PB1D9	chr3	108267836	108267956	120	-	212.167	4.14	41.4722	3.21116e-12
SINE	Alu	B1_Mur3	chr8	20725659	20725804	145	-	40.4485	0	41.4485	2.21171e-12
SINE	Alu	B1_Mur2	chr8	70668278	70668398	120	-	40.4392	0	41.4392	1.99016e-12
SINE	B2	B3A	chr16	37885920	37886057	137	-	40.3999	0	41.3999	5.09333e-13
DNA	hAT-Charlie	URR1A	chr10	85958956	85959135	179	+	40.3941	0	41.3941	8.10004e-13
SINE	Alu	B1_Mur1	chr13	49384620	49384753	133	+	40.3733	0	41.3733	1.3662e-12
SINE	B2	B3A	chr3	52180871	52181023	152	-	40.3114	0	41.3114	1.25135e-12
SINE	B2	B3A	chr1	236706393	236706537	144	-	40.2672	0	41.2672	8.80124e-13
SINE	B2	B3A	chr1	83449996	83450123	127	-	40.253	0	41.253	2.4203e-12
SINE	B4	B4	chr12	9245425	9245587	162	+	40.25	0	41.25	8.12052e-13
SINE	B2	B3	chr20	8356167	8356379	212	-	175.388	3.27749	41.2363	2.18744e-12
SINE	B2	B3A	chr16	37892170	37892307	137	-	40.225	0	41.225	5.09333e-13
SINE	B4	ID_B1	chr7	9979080	9979253	173	+	40.2164	0	41.2164	9.14901e-13
SINE	B2	B3	chr1	99082388	99082593	205	+	125.5	2.07	41.2052	1.82898e-12
SINE	B2	B3A	chr7	127657378	127657549	171	-	125.413	2.07	41.1769	1.36363e-12
SINE	B4	B4A	chr2	145212830	145212925	95	+	40.1661	0	41.1661	1.45972e-12
SINE	MIR	MIR	chr16	10504144	10504285	141	+	40.1623	0	41.1623	8.75142e-13
SINE	B4	RSINE1	chr6	14162909	14163018	109	+	40.1576	0	41.1576	1.08341e-12
SINE	B4	RSINE1	chr1	40047914	40048020	106	-	40.1225	0	41.1225	8.57528e-13
LTR	ERVL-MaLR	MTEa	chr8	108166335	108166514	179	-	40.1114	0	41.1114	2.22083e-12
SINE	B2	B3	chr8	45992794	45992974	180	+	40.075	0	41.075	8.63271e-13
SINE	B2	B3A	chr16	37891972	37892108	136	-	40.0647	0	41.0647	5.09333e-13
SINE	B4	RSINE1	chr5	149326037	149326210	173	+	40.0535	0	41.0535	1.49697e-12
SINE	B2	B3	chr8	102184510	102184691	181	+	40.05	0	41.05	3.61446e-12
SINE	MIR	MIRb	chr16	25780017	25780159	142	+	40.0484	0	41.0484	9.10532e-13
SINE	B4	RSINE1	chr12	42701484	42701630	146	-	82.5333	1.035	41.0483	1.08401e-11
LTR	ERVL	MER54A	chr13	36904463	36904847	384	+	125	2.07	41.0423	1.49151e-12
SINE	B4	RSINE1	chr2	61693963	61694080	117	-	40.0303	0	41.0303	5.42487e-13
SINE	Alu	PB1D7	chr10	108293403	108293492	89	+	40.025	0	41.025	7.9732e-13
SINE	B4	B4	chr10	59640654	59640841	187	-	40	0	41	1.51194e-12
SINE	B2	B3A	chr1	35166030	35166211	181	-	40	0	41	8.08913e-13
SINE	B2	B3A	chr19	50051336	50051510	174	+	40	0	41	8.28961e-12
SINE	B4	ID_B1	chr4	7080060	7080210	150	-	40	0	41	8.07576e-13
SINE	Alu	B1F	chr10	37246742	37246887	145	+	40	0	41	1.28589e-12
SINE	B4	ID_B1	chr2	190332586	190332717	131	+	40	0	41	9.46578e-13
SINE	Alu	PB1D10	chr11	68393883	68394006	123	+	40	0	41	8.96637e-13
SINE	MIR	MIRb	chr19	48508948	48509067	119	+	40	0	41	1.45972e-12
SINE	B4	B4A	chr5	142926388	142926503	115	-	40	0	41	8.14156e-13
SINE	Alu	PB1D7	chr5	154127073	154127187	114	-	40	0	41	1.21532e-12
SINE	Alu	B1_Mur2	chr5	8620240	8620351	111	+	40	0	41	1.94647e-12
SINE	Alu	B1_Rn	chr2	39102220	39102328	108	-	40	0	41	1.1564e-12
SINE	Alu	PB1D9	chr12	34922679	34922781	102	+	40	0	41	8.46576e-13
SINE	Alu	B1F	chr13	40512275	40512373	98	+	40	0	41	1.17484e-12
SINE	Alu	B1F	chr7	73566370	73566462	92	-	40	0	41	8.10004e-13
SINE	B4	B4	chr11	74327234	74327305	71	-	40	0	41	1.92436e-12
LTR	ERVL-MaLR	MLT1K	chr1	140670093	140670286	193	+	40	0	41	8.38931e-13
LINE	L2	L2	chr17	82300269	82300404	135	-	40	0	41	1.33431e-12
LINE	L2	L2	chr8	7369964	7370065	101	+	40	0	41	8.01257e-13
SINE	B2	B3	chr10	9226310	9226464	154	+	39.9789	0	40.9789	1.49217e-12
SINE	ID	ID4_	chr4	183972651	183972726	75	+	39.959	0	40.959	1.62478e-12
LTR	ERVK	RNLTR15A2	chr3	41021683	41021915	232	+	61.069	0.5175	40.9021	1.65753e-12
SINE	B4	ID_B1	chr8	47648550	47648695	145	+	49.2841	0.23	40.8814	1.86413e-12
SINE	B4	B4	chr8	48488543	48488827	284	-	124.404	2.07	40.8482	5.04521e-13
SINE	B2	B3	chr13	36360154	36360340	186	+	39.7559	0	40.7559	1.4184e-12
SINE	B2	B3A	chr3	157722278	157722392	114	+	39.7414	0	40.7414	1.62362e-12
SINE	B4	B4	chr4	172934137	172934434	297	+	124.044	2.07	40.7309	9.81139e-13
SINE	Alu	B1F	chr16	81297689	81297834	145	-	39.7178	0	40.7178	9.18272e-13
SINE	B4	RSINE1	chr20	3017342	3017525	183	+	39.7171	0	40.7171	1.99277e-12
LINE	L2	L2	chr5	142950961	142951427	466	+	124	2.07	40.7166	1.32251e-12
SINE	B4	B4A	chr9	32766763	32767017	254	-	123.904	2.07	40.6853	1.80219e-12
SINE	B4	RSINE1	chr14	86384174	86384289	115	+	44.9375	0.129375	40.6752	8.30728e-13
SINE	B4	ID_B1	chr3	75626159	75626348	189	+	39.6667	0	40.6667	7.97774e-13
SINE	B2	B3A	chr16	37871700	37871825	125	-	39.6057	0	40.6057	5.09333e-13
SINE	B2	B3A	chr19	26575399	26575551	152	+	39.5632	0	40.5632	8.11441e-13
LTR	ERVL-MaLR	MTD	chr3	11298593	11298788	195	-	39.5325	0	40.5325	2.05985e-12
SINE	B2	B3A	chr14	45317216	45317370	154	-	39.523	0	40.523	1.34749e-12
SINE	B4	B4A	chr1	175648048	175648313	265	-	123.336	2.07	40.5003	1.41965e-12
SINE	B4	ID_B1	chr5	125162309	125162488	179	-	39.5	0	40.5	1.38701e-12
SINE	B4	ID_B1	chr8	119052060	119052205	145	-	39.5	0	40.5	7.98272e-13
SINE	B4	RSINE1	chr19	39764965	39765083	118	-	39.4952	0	40.4952	8.31395e-13
SINE	B4	B4	chr4	6690965	6691120	155	+	207.037	4.14	40.4741	1.61018e-12
SINE	B4	RSINE1	chr5	171987745	171987853	108	-	39.4696	0	40.4696	2.16389e-12
SINE	MIR	MIRb	chr1	158936970	158937104	134	+	39.4643	0	40.4643	8.33888e-13
SINE	B2	B3	chr3	52108975	52109112	137	-	39.437	0	40.437	1.13059e-12
LTR	ERVL-MaLR	MLT1L	chr11	67088421	67088603	182	+	43.8414	0.108947	40.436	6.39275e-13
SINE	Alu	B1_Mur4	chr3	170880409	170880563	154	-	39.4314	0	40.4314	7.6947e-13
SINE	B4	B4A	chr5	119403692	119403884	192	+	39.4265	0	40.4265	8.12905e-13
SINE	Alu	B1_Mur3	chr11	85297336	85297473	137	-	39.4217	0	40.4217	8.61547e-13
SINE	B4	B4	chr4	1337527	1337690	163	-	39.4105	0	40.4105	1.41996e-12
SINE	B4	B4A	chr16	15179123	15179313	190	+	123	2.07	40.3909	1.99779e-12
SINE	B4	RSINE1	chr4	57316250	57316386	136	-	39.3788	0	40.3788	8.08359e-13
SINE	B2	B3	chr19	24810278	24810453	175	+	39.377	0	40.377	2.2265e-12
SINE	B4	B4A	chr19	35877231	35877398	167	-	39.3753	0	40.3753	8.59502e-13
LTR	ERVL	MLT2B5	chr4	67492673	67492835	162	+	39.3604	0	40.3604	8.15743e-13
SINE	B2	B3A	chr3	33595545	33595685	140	-	39.3595	0	40.3595	7.99971e-13
SINE	MIR	MIRb	chr1	175605243	175605388	145	+	39.3509	0	40.3509	8.74706e-13
SINE	B2	B3A	chr7	95678012	95678140	128	+	39.3472	0	40.3472	9.63406e-13
SINE	B4	B4	chr8	93667157	93667234	77	+	39.3378	0	40.3378	2.18894e-12
SINE	B4	RSINE1	chr8	119390575	119390753	178	-	67.1008	0.689999	40.2963	7.87955e-13
SINE	B4	B4A	chr2	214879503	214879791	288	-	205.924	4.14	40.2576	1.4389e-12
SINE	B4	RSINE1	chr5	146338631	146338731	100	+	39.2558	0	40.2558	1.93753e-12
SINE	ID	ID_Rn2	chr5	156779196	156779290	94	-	39.2547	0	40.2547	1.26486e-12
LTR	ERVK	RLTR25B	chr19	26249212	26249336	124	+	60.0833	0.5175	40.2526	1.93906e-12
LTR	ERVK	RLTR40	chr7	122404988	122405105	117	+	239.17	4.968	40.243	1.31196e-12
SINE	B2	B3A	chr1	99069225	99069399	174	-	39.2217	0	40.2217	1.39822e-12
SINE	B4	RSINE1	chr1	158169341	158169494	153	-	39.2035	0	40.2035	8.30728e-13
SINE	B2	B3A	chr16	37888052	37888211	159	-	39.178	0	40.178	5.09333e-13
SINE	B4	RSINE1	chr7	44056730	44056860	130	+	39.1653	0	40.1653	1.91059e-12
SINE	Alu	PB1D10	chr4	172962331	172962437	106	+	39.1592	0	40.1592	8.75142e-13
SINE	Alu	B1F	chr6	3353983	3354118	135	-	39.1556	0	40.1556	8.44142e-13
SINE	Alu	PB1D10	chr2	214810994	214811083	89	-	39.1452	0	40.1452	3.04678e-12
SINE	B2	B3A	chr5	58642288	58642379	91	+	39.143	0	40.143	1.36433e-12
SINE	Alu	B1_Mur3	chr4	56675331	56675472	141	-	39.1325	0	40.1325	7.98637e-13
SINE	Alu	B1_Mur2	chr1	46575922	46576074	152	+	39.132	0	40.132	2.26691e-12
Low_complexity	Low_complexity	AT_rich	chr11	45699957	45700006	49	+	39.1174	0	40.1174	1.89791e-12
LTR	ERVK	RLTR21	chr16	85157530	85157667	137	+	39.1062	0	40.1062	8.51661e-13
SINE	B2	B3A	chr17	84903341	84903501	160	+	39.0989	0	40.0989	8.28556e-13
SINE	B4	B4	chr6	104832894	104833080	186	-	39.0756	0	40.0756	8.09551e-13
DNA	hAT-Charlie	URR1A	chr4	155328029	155328213	184	-	39.0528	0	40.0528	8.46667e-13
SINE	B4	RSINE1	chr16	3395778	3395944	166	-	39.0333	0	40.0333	1.11661e-12
DNA	TcMar-Tigger	MER2	chr10	20191756	20191882	126	+	39.0323	0	40.0323	1.40437e-12
SINE	B4	ID_B1	chr10	86769781	86769957	176	-	39.021	0	40.021	8.09141e-13
SINE	B2	B3A	chr16	37878330	37878467	137	-	39.0132	0	40.0132	5.09333e-13
SINE	B2	B3	chr16	48253714	48253892	178	+	39	0	40	8.30728e-13
SINE	B2	B3	chr19	53303415	53303593	178	+	39	0	40	8.63761e-13
SINE	B2	B3A	chr17	9748998	9749173	175	+	39	0	40	8.28006e-13
SINE	B4	B4	chr12	25973760	25973927	167	-	39	0	40	8.4843e-13
SINE	B4	RSINE1	chr7	139278262	139278424	162	+	39	0	40	1.24064e-12
SINE	B4	RSINE1	chr6	35840631	35840790	159	-	39	0	40	8.28556e-13
SINE	B4	RSINE1	chr4	156764518	156764672	154	-	39	0	40	9.92448e-13
SINE	MIR	MIR	chr10	95107003	95107154	151	+	39	0	40	7.82109e-13
SINE	MIR	MIRb	chr19	49301925	49302060	135	-	39	0	40	7.56644e-13
SINE	Alu	B1F1	chr3	89979609	89979744	135	-	39	0	40	1.23929e-12
SINE	Alu	B1_Mur1	chr13	11862859	11862993	134	-	39	0	40	1.63056e-12
SINE	B4	B4A	chr1	181450079	181450211	132	-	39	0	40	5.32777e-13
SINE	Alu	PB1D7	chr3	89048521	89048620	99	-	39	0	40	8.1123e-13
SINE	B4	RSINE1	chr19	53361097	53361188	91	+	39	0	40	1.40446e-12
SINE	B4	RSINE1	chr1	134119635	134119723	88	+	39	0	40	7.9732e-13
LTR	ERV1	RMER5	chr1	93983105	93983210	105	+	39	0	40	1.14982e-12
LINE	L2	L2	chr2	144955220	144955385	165	+	39	0	40	1.16461e-12
LTR	ERVK	RMER4B	chr11	74051981	74052131	150	+	38.9478	0	39.9478	2.16119e-12
SINE	B2	B3	chr10	37241328	37241489	161	+	121.48	2.07	39.8958	8.01738e-13
SINE	B2	B3A	chr16	37876171	37876309	138	-	38.891	0	39.891	5.09333e-13
SINE	B2	B3A	chr10	20890047	20890200	153	+	38.8729	0	39.8729	1.91916e-12
SINE	ID	ID2	chr17	27250107	27250154	47	-	38.8692	0	39.8692	8.253e-13
SINE	Alu	B1_Mur3	chr6	3190131	3190259	128	-	38.8389	0	39.8389	1.39583e-12
SINE	B4	ID_B1	chr1	2479073	2479249	176	-	38.7994	0	39.7994	1.37558e-12
SINE	Alu	B1_Mur1	chr11	45699223	45699365	142	+	121.056	2.07	39.7577	1.89791e-12
SINE	Alu	B1_Rn	chr7	9978892	9979028	136	+	38.7051	0	39.7051	9.14901e-13
SINE	B4	B4	chr1	98751254	98751320	66	-	38.7002	0	39.7002	4.46784e-12
SINE	B4	RSINE1	chr13	47518008	47518172	164	-	38.668	0	39.668	8.88832e-13
SINE	B4	B4	chr15	15089649	15089830	181	+	38.6442	0	39.6442	9.34324e-13
LINE	L2	L2	chr15	109351021	109351207	186	+	38.6153	0	39.6153	9.38004e-13
SINE	Alu	B1_Mur3	chr7	120318846	120318997	151	-	38.5977	0	39.5977	2.73317e-12
SINE	B2	B3A	chr16	37881832	37881957	125	-	38.5924	0	39.5924	5.09333e-13
SINE	B4	RSINE1	chr8	20725134	20725226	92	-	38.5808	0	39.5808	2.21171e-12
SINE	B4	ID_B1	chr10	39034028	39034130	102	-	38.5768	0	39.5768	7.18947e-13
DNA	hAT-Charlie	MER58A	chr8	46032099	46032317	218	+	120.5	2.07	39.5765	2.60446e-12
SINE	B4	ID_B1	chr17	12489061	12489127	66	-	38.5755	0	39.5755	2.645e-12
SINE	B4	B4A	chr4	64659278	64659552	274	+	120.454	2.07	39.5616	1.46061e-12
SINE	B2	B3A	chr6	59996451	59996577	126	-	38.557	0	39.557	7.52601e-13
SINE	B2	B3	chr8	108640844	108640996	152	+	38.5378	0	39.5378	5.04904e-13
SINE	B2	B3	chr14	36096543	36096662	119	+	38.5358	0	39.5358	1.15165e-08
Satellite	Satellite	ZP3AR	chr19	30573781	30573866	85	-	38.5112	0	39.5112	1.63894e-12
LTR	ERV1	RMER5	chr4	182678652	182678751	99	+	38.5095	0	39.5095	1.74631e-12
SINE	Alu	PB1D10	chr1	87020415	87020506	91	-	38.5005	0	39.5005	1.84448e-12
SINE	Alu	B1F2	chr19	23136304	23136428	124	+	38.5	0	39.5	3.0294e-12
SINE	Alu	B1_Rn	chr20	22262342	22262464	122	-	38.5	0	39.5	1.27392e-12
SINE	Alu	B1_Mur3	chr14	104300464	104300567	103	-	38.4766	0	39.4766	1.28564e-12
LTR	ERVK	RMER4B	chr11	74052158	74052540	382	+	120.166	2.07	39.4678	2.16119e-12
SINE	B2	B3	chr8	21153210	21153323	113	+	38.458	0	39.458	8.07576e-13
SINE	B2	B3	chr11	14472856	14472955	99	+	38.4469	0	39.4469	1.46393e-12
SINE	B4	ID_B1	chr5	161239240	161239426	186	-	38.4058	0	39.4058	1.29166e-09
SINE	B4	RSINE1	chr10	86189362	86189488	126	-	38.404	0	39.404	1.43495e-12
LTR	ERVL-MaLR	MTD	chr18	75915209	75915564	355	+	160.619	3.105	39.3713	1.4617e-12
SINE	B4	B4A	chr3	157721653	157721916	263	+	201.25	4.14	39.3482	1.62362e-12
SINE	B4	RSINE1	chr18	31364908	31365042	134	-	38.3382	0	39.3382	1.29407e-12
SINE	ID	ID_Rn1	chr5	156778839	156778935	96	-	38.3031	0	39.3031	1.26486e-12
SINE	B2	B3	chr2	143951618	143951790	172	-	38.274	0	39.274	1.3689e-12
SINE	B4	RSINE1	chr10	47721674	47721824	150	+	38.2633	0	39.2633	1.84121e-12
SINE	B2	B3	chr12	45868888	45869073	185	+	38.25	0	39.25	9.50662e-13
SINE	B4	RSINE1	chr12	25704682	25704805	123	-	38.2381	0	39.2381	2.98871e-12
SINE	B2	B3A	chr17	27266770	27266921	151	-	38.2347	0	39.2347	8.49596e-13
SINE	B4	B4A	chr17	71788459	71788720	261	+	119.395	2.07	39.2166	1.36025e-12
LTR	ERV1	NICER2_Rn	chr15	87208812	87208941	129	+	38.2106	0	39.2106	6.49357e-12
SINE	B2	B2_Rat3	chr17	47326756	47326937	181	+	38.1989	0	39.1989	3.4249e-12
SINE	B4	ID_B1	chr2	158129408	158129557	149	-	38.1701	0	39.1701	8.39877e-13
SINE	B2	B3A	chr20	43694567	43694745	178	-	38.1667	0	39.1667	1.58148e-11
SINE	B2	B3A	chr9	42656171	42656333	162	-	38.1601	0	39.1601	8.33702e-13
LTR	ERVK	RMER12	chr1	129973928	129974043	115	-	38.1466	0	39.1466	1.24913e-12
SINE	B2	B3A	chr16	37890502	37890639	137	-	46.211	0.207	39.1143	5.09333e-13
SINE	MIR	MIR	chr8	50894288	50894404	116	-	119	2.07	39.0879	7.62747e-12
LTR	ERVL-MaLR	MLT1J	chr1	182914574	182914959	385	+	119	2.07	39.0879	8.96884e-13
SINE	Alu	PB1D10	chr2	198301571	198301684	113	-	78.5333	1.035	39.0827	1.56242e-11
SINE	B2	B3	chr5	2899195	2899309	114	+	38.0797	0	39.0797	8.25821e-13
SINE	B2	B3A	chr10	1846448	1846606	158	-	38.0476	0	39.0476	1.70435e-11
SINE	B4	B4A	chr7	67186231	67186344	113	+	190.801	3.91261	39.0426	3.47859e-11
SINE	Alu	B1F	chr9	74022635	74022739	104	+	38.0417	0	39.0417	7.99188e-13
SINE	B4	B4A	chrX	16036230	16036384	154	+	38.0294	0	39.0294	1.2654e-12
SINE	B4	RSINE1	chr13	32482539	32482691	152	+	38.0292	0	39.0292	8.88573e-13
SINE	Alu	B1_Mur4	chr1	109218171	109218306	135	+	38.0227	0	39.0227	1.23669e-12
SINE	MIR	MIRb	chr13	84030907	84031057	150	+	38.0208	0	39.0208	2.2398e-12
SINE	Alu	B1_Mur4	chr1	95063646	95063751	105	-	38.0201	0	39.0201	1.39757e-12
SINE	Alu	B1_Mur2	chr19	50149304	50149412	108	+	38.0189	0	39.0189	8.70607e-13
SINE	B2	B3	chr10	1507556	1507745	189	-	38	0	39	1.94674e-12
SINE	B4	ID_B1	chr18	48662973	48663157	184	+	38	0	39	1.29639e-12
SINE	B2	B3A	chr1	233836530	233836700	170	+	38	0	39	1.4302e-12
SINE	B4	B4A	chr11	69175433	69175594	161	-	38	0	39	7.37279e-13
SINE	MIR	MIR	chr2	224483869	224484029	160	-	38	0	39	7.29132e-13
SINE	B4	RSINE1	chr18	59134551	59134703	152	-	38	0	39	8.10004e-13
SINE	B2	B3A	chr4	123447253	123447403	150	+	38	0	39	8.56654e-13
SINE	B4	RSINE1	chr14	111152561	111152704	143	-	38	0	39	7.9732e-13
SINE	B4	RSINE1	chr5	138344652	138344782	130	+	38	0	39	1.26614e-12
SINE	B4	B4A	chr17	92379300	92379409	109	+	38	0	39	7.37279e-13
SINE	Alu	B1_Mur2	chr5	25743822	25743927	105	+	38	0	39	1.97417e-12
SINE	Alu	PB1D7	chr8	55161280	55161375	95	+	38	0	39	1.1564e-12
SINE	B4	B4A	chr8	69083052	69083145	93	-	38	0	39	8.00403e-13
SINE	Alu	B1F2	chr8	48457001	48457082	81	-	38	0	39	9.51622e-13
SINE	ID	ID4	chr1	231573141	231573207	66	+	38	0	39	7.79583e-13
LTR	ERVL-MaLR	MLT1A1	chr5	2955167	2955315	148	+	38	0	39	9.25726e-13
LTR	ERVL-MaLR	MLT1A1	chr1	175563027	175563108	81	+	38	0	39	7.97353e-13
Low_complexity	Low_complexity	AT_rich	chr10	21597366	21597389	23	+	38	0	39	4.68709e-12
DNA	hAT-Charlie	RMER30	chr1	16436202	16436386	184	+	38	0	39	2.22592e-12
DNA	hAT-Charlie	RMER30	chr3	17413140	17413322	182	-	38	0	39	8.91681e-13
LTR	ERVL-MaLR	ORR1D1	chr4	6408012	6408151	139	-	37.9677	0	38.9677	8.08569e-13
SINE	B4	RSINE1	chr17	36971302	36971461	159	-	43.7119	0.147857	38.9525	8.78719e-13
SINE	B2	B3	chr19	24876586	24876805	219	-	45.2647	0.188182	38.9374	1.43474e-12
LTR	ERVK	RMER4B	chr7	58877233	58877775	542	+	279.066	6.21	38.8441	9.74673e-13
SINE	B4	B4A	chr7	138949855	138950102	247	-	118.238	2.07	38.8397	1.38472e-12
SINE	B4	RSINE1	chr17	47253951	47254046	95	+	37.8395	0	38.8395	5.08572e-12
LTR	ERV1	RMER5	chr4	82946029	82946575	546	+	118.199	2.07	38.827	7.82109e-13
SINE	B4	RSINE1	chr1	136151719	136151845	126	+	37.81	0	38.81	7.71359e-13
SINE	B4	RSINE1	chr10	74470786	74470906	120	+	37.7975	0	38.7975	9.25932e-13
SINE	B4	B4	chr19	56364581	56364661	80	-	37.7951	0	38.7951	7.79331e-13
LTR	ERVL	RMER15	chr12	25871291	25871552	261	-	118.026	2.07	38.7707	7.37279e-13
SINE	B2	B3A	chr1	149647189	149647338	149	-	37.7548	0	38.7548	8.40963e-13
LTR	ERVL-MaLR	ORR1D1	chr20	10854507	10854694	187	+	37.7188	0	38.7188	1.2975e-12
LTR	ERVL-MaLR	MTEb	chr11	4750919	4750991	72	+	37.7179	0	38.7179	1.97267e-12
DNA	hAT-Charlie	MER5A	chr1	168839181	168839280	99	-	117.793	2.07	38.6948	3.05131e-12
SINE	B2	B3A	chr1	64076115	64076285	170	+	37.6945	0	38.6945	8.18013e-13
SINE	B2	B3A	chr16	37891345	37891482	137	-	37.6916	0	38.6916	5.09333e-13
SINE	B4	RSINE1	chr3	9374063	9374141	78	-	53.7074	0.414	38.6898	2.10855e-12
SINE	B4	RSINE1	chr5	104185879	104185983	104	+	37.6667	0	38.6667	7.9833e-13
SINE	B4	RSINE1	chr4	174558408	174558538	130	-	41.7919	0.108947	38.5879	2.27866e-12
SINE	B4	ID_B1	chr17	27249610	27249728	118	-	37.586	0	38.586	8.253e-13
LTR	ERVK	RLTR22_Mur	chr11	13666122	13666216	94	+	37.5545	0	38.5545	1.51194e-12
SINE	Alu	B1_Mur2	chr5	25508981	25509130	149	-	37.5384	0	38.5384	2.33121e-11
SINE	B4	B4	chr17	71945357	71945500	143	+	48.1387	0.275999	38.51	1.34944e-12
SINE	B2	B3A	chr12	27250501	27250680	179	+	37.508	0	38.508	5.43048e-13
SINE	B4	ID_B1	chr14	110429601	110429780	179	-	37.5	0	38.5	9.11365e-13
LTR	ERVL	RMER15	chr13	36816836	36817205	369	+	196.844	4.14	38.4911	8.07576e-13
SINE	B2	B3A	chr2	119316248	119316376	128	+	37.4801	0	38.4801	9.189e-13
SINE	B2	B3A	chr13	88038997	88039161	164	-	37.4675	0	38.4675	8.18308e-13
SINE	Alu	B1_Rn	chr5	13336431	13336567	136	+	37.4654	0	38.4654	1.95632e-12
SINE	B2	B3A	chr12	26331399	26331558	159	-	37.4611	0	38.4611	8.49472e-13
SINE	B2	B3A	chr17	82604270	82604446	176	-	37.4266	0	38.4266	8.4008e-13
SINE	B2	B3A	chr10	92064113	92064186	73	-	37.4036	0	38.4036	2.26356e-12
LTR	ERVL-MaLR	MTE2a	chr15	158461	158588	127	+	37.3984	0	38.3984	8.60493e-13
SINE	B4	RSINE1	chr17	82216062	82216210	148	-	37.3633	0	38.3633	1.9379e-12
SINE	Alu	B1F	chr6	64005317	64005434	117	-	37.3444	0	38.3444	2.63562e-12
SINE	B2	B3A	chr16	37899378	37899514	136	-	37.3306	0	38.3306	5.09333e-13
SINE	Alu	PB1D10	chr9	10914655	10914736	81	-	37.3258	0	38.3258	1.1465e-12
SINE	Alu	B1_Mur1	chr9	42656354	42656498	144	-	37.3051	0	38.3051	8.33702e-13
SINE	Alu	B1_Rn	chr8	108654477	108654600	123	+	37.2904	0	38.2904	1.18637e-12
SINE	B2	B3A	chr2	122672327	122672486	159	-	37.2779	0	38.2779	8.11622e-13
SINE	B2	B3A	chr8	29601213	29601377	164	-	37.2744	0	38.2744	2.82543e-12
SINE	Alu	PB1D10	chr3	145685977	145686080	103	-	37.2603	0	38.2603	8.52194e-13
SINE	MIR	MIR	chr5	125183719	125183865	146	+	37.25	0	38.25	1.67456e-12
DNA	hAT-Charlie	MER5A	chr10	47733152	47733216	64	+	37.25	0	38.25	7.45582e-13
SINE	Alu	B1_Mur1	chr1	83376996	83377125	129	+	37.2417	0	38.2417	8.41619e-13
SINE	B4	RSINE1	chr8	10213572	10213706	134	-	37.2402	0	38.2402	1.40354e-12
SINE	B4	B4	chr1	203267521	203267775	254	+	116.328	2.07	38.2176	1.87171e-12
SINE	Alu	PB1D10	chr7	73575516	73575607	91	+	37.2077	0	38.2077	1.59197e-12
SINE	B2	B3	chr3	75321271	75321449	178	-	37.1859	0	38.1859	8.11919e-13
SINE	B4	RSINE1	chr4	146783666	146783794	128	+	37.1667	0	38.1667	9.51965e-13
SINE	B2	B3A	chr20	15180790	15180962	172	+	37.1661	0	38.1661	8.18014e-13
SINE	B4	RSINE1	chr8	21148251	21148330	79	+	37.1534	0	38.1534	8.28886e-13
LTR	ERVL	MT2A	chr9	88610976	88611138	162	+	37.149	0	38.149	2.88469e-12
SINE	B4	RSINE1	chr5	107313219	107313368	149	-	37.1429	0	38.1429	8.86646e-13
SINE	Alu	B1F	chr7	10074028	10074121	93	-	37.1323	0	38.1323	5.17963e-12
SINE	B2	B3A	chr13	37174561	37174647	86	+	37.1292	0	38.1292	2.35379e-12
SINE	Alu	B1_Mur4	chr4	155357679	155357770	91	-	37.1287	0	38.1287	9.10532e-13
SINE	B2	B3A	chr10	105649196	105649380	184	-	37.1238	0	38.1238	8.0016e-13
LTR	ERVL-MaLR	MTE2a	chr20	52435790	52436122	332	-	116	2.07	38.1107	7.97342e-13
SINE	B2	B3A	chr16	37877905	37878030	125	-	37.0747	0	38.0747	5.09333e-13
SINE	B4	RSINE1	chr4	156364559	156364720	161	+	37.0385	0	38.0385	7.99407e-13
LTR	ERVL-MaLR	MLT1B	chr4	59569026	59569196	170	+	37.0337	0	38.0337	8.75142e-13
SINE	B2	B3A	chr16	37876841	37876979	138	-	37.033	0	38.033	5.09333e-13
SINE	Alu	B1_Mur1	chr2	40834883	40835015	132	-	37.0286	0	38.0286	1.2773e-12
LTR	ERVL-MaLR	MTE2a	chr18	30689166	30689540	374	+	76.3676	1.035	38.0185	7.98869e-13
SINE	B4	ID_B1	chr2	182563116	182563285	169	-	37.0132	0	38.0132	8.30208e-13
LTR	ERVK	RMER12	chr4	146469317	146469437	120	+	37.0128	0	38.0128	1.45161e-12
SINE	B4	B4A	chr4	22381507	22381630	123	+	37.0016	0	38.0016	8.286e-13
SINE	B2	B3A	chr3	108862286	108862454	168	+	37	0	38	1.39735e-12
SINE	B4	RSINE1	chr11	69706195	69706347	152	+	37	0	38	1.86643e-12
SINE	Alu	B1_Mur2	chr2	234143204	234143352	148	+	37	0	38	2.25627e-12
SINE	B4	RSINE1	chr4	149617152	149617300	148	+	37	0	38	1.84911e-12
SINE	MIR	MIR	chr2	111409466	111409611	145	-	37	0	38	1.77075e-12
SINE	Alu	B1_Mur2	chr12	46661751	46661888	137	-	37	0	38	7.87334e-13
SINE	Alu	B1F1	chr5	158199527	158199664	137	-	37	0	38	1.41552e-12
SINE	B4	ID_B1	chr7	61613444	61613580	136	+	37	0	38	8.19057e-13
SINE	Alu	B1F1	chr4	105139881	105140012	131	-	37	0	38	8.28556e-13
SINE	Alu	B1_Mur1	chr8	118521315	118521442	127	-	37	0	38	1.75225e-12
SINE	Alu	B1_Mur4	chr12	12176772	12176897	125	-	37	0	38	1.27197e-12
SINE	B2	B3	chr18	40145055	40145180	125	+	37	0	38	5.23928e-13
SINE	Alu	PB1D9	chr1	259837740	259837864	124	+	37	0	38	1.42527e-12
SINE	B4	ID_B1	chr3	170993880	170993998	118	-	37	0	38	2.25627e-12
SINE	B4	ID_B1	chr3	146656699	146656814	115	-	37	0	38	1.61018e-12
SINE	MIR	MIRb	chr5	130373283	130373394	111	-	37	0	38	1.15606e-12
SINE	Alu	PB1D10	chr1	246953729	246953832	103	+	37	0	38	7.47746e-13
SINE	ID	ID4	chrX	48826423	48826504	81	-	37	0	38	1.14621e-12
SINE	B4	B4	chr5	130060478	130060542	64	+	37	0	38	2.0479e-12
SINE	Alu	PB1D9	chr5	61856125	61856187	62	+	37	0	38	8.10824e-13
SINE	Alu	PB1D7	chr1	95866746	95866804	58	+	37	0	38	7.82109e-13
LTR	ERVL	MT2A	chr1	107535649	107535815	166	-	37	0	38	8.60149e-13
LTR	ERVK	RLTR18B	chr9	65139212	65139378	166	-	37	0	38	1.1564e-12
LTR	ERVL-MaLR	MLT1A	chr16	10547228	10547351	123	+	37	0	38	1.25762e-12
DNA	hAT-Charlie	URR1A	chr8	116693420	116693572	152	+	37	0	38	1.86276e-12
DNA	hAT-Charlie	MER5B	chr6	14450794	14450892	98	-	37	0	38	1.8625e-12
SINE	B2	B3A	chr16	37885065	37885202	137	-	44.8641	0.207	37.9984	5.09333e-13
SINE	B2	B3	chr7	23304580	23304756	176	-	36.991	0	37.991	1.23533e-12
SINE	B2	B3	chr2	21661604	21661777	173	-	36.9818	0	37.9818	3.04678e-12
SINE	Alu	PB1D9	chr17	88756721	88756852	131	-	36.9367	0	37.9367	8.01786e-13
SINE	B4	B4A	chr15	15063905	15064078	173	+	36.921	0	37.921	7.37279e-13
SINE	B2	B3	chr12	4209628	4209763	135	-	36.8004	0	37.8004	8.21156e-13
Other	Other	RMER1A	chr16	15681730	15681947	217	-	115	2.07	37.785	3.07819e-12
LINE	L2	L2	chr13	108867284	108867391	107	+	36.7541	0	37.7541	1.32399e-12
SINE	B2	B2_Rat4	chr3	170800343	170800497	154	-	36.7486	0	37.7486	8.54688e-13
SINE	B4	RSINE1	chr4	155324684	155324792	108	+	36.668	0	37.668	8.46667e-13
SINE	B2	B3	chr10	15229009	15229182	173	-	36.6667	0	37.6667	7.50242e-13
SINE	Alu	PB1D7	chr17	36939344	36939453	109	-	36.6483	0	37.6483	8.29811e-13
SINE	Alu	B1_Rn	chr4	125958050	125958198	148	-	36.6124	0	37.6124	1.14621e-12
SINE	B4	ID_B1	chr17	82548616	82548737	121	-	36.5762	0	37.5762	8.02699e-13
SINE	B4	ID_B1	chr1	166719532	166719700	168	-	36.5592	0	37.5592	1.44501e-12
SINE	Alu	PB1D10	chr1	175594883	175594980	97	+	36.5109	0	37.5109	7.77321e-13
SINE	B2	B3A	chr13	90282598	90282777	179	+	36.5	0	37.5	8.10004e-13
SINE	B2	B3A	chr18	27430659	27430794	135	+	36.5	0	37.5	1.90904e-12
SINE	Alu	B1_Mur4	chr4	43437870	43438000	130	-	36.5	0	37.5	7.98746e-13
DNA	hAT-Charlie	URR1B	chr1	168795650	168795772	122	-	36.5	0	37.5	1.97457e-12
SINE	Alu	B1F	chr11	69174768	69174893	125	+	36.4849	0	37.4849	7.37279e-13
SINE	B2	B3	chr7	137509162	137509326	164	+	36.4016	0	37.4016	8.27993e-13
SINE	Alu	B1F2	chr9	90737978	90738118	140	-	36.391	0	37.391	1.36613e-12
SINE	B4	RSINE1	chr14	25727676	25727841	165	-	36.3333	0	37.3333	7.41142e-13
SINE	Alu	B1_Mur2	chr2	122371901	122372036	135	+	36.3333	0	37.3333	9.2523e-13
SINE	Alu	B1_Mur2	chr6	113176617	113176748	131	+	36.3333	0	37.3333	7.43002e-13
SINE	Alu	B1_Mur2	chr13	40516199	40516328	129	-	36.3274	0	37.3274	1.17484e-12
SINE	B2	B3	chr18	24528758	24528921	163	-	36.3155	0	37.3155	1.58265e-11
LTR	ERVL-MaLR	ORR1E	chr12	27175767	27175933	166	-	36.2786	0	37.2786	8.534e-13
SINE	B2	B3	chr5	156858906	156859070	164	-	36.2565	0	37.2565	7.82109e-13
SINE	ID	ID_Rn1	chr7	114472012	114472114	102	+	36.2499	0	37.2499	7.71577e-13
SINE	B2	B3	chr3	149580142	149580313	171	-	36.2482	0	37.2482	7.40594e-13
DNA	TcMar-Tigger	MER2	chr16	85509901	85510044	143	+	36.2359	0	37.2359	2.68355e-12
SINE	B2	B3A	chr17	59446611	59446788	177	+	47.1807	0.295714	37.1847	7.9732e-13
SINE	B4	ID_B1	chr19	35584728	35584850	122	+	36.1829	0	37.1829	7.37279e-13
SINE	B4	B4	chr1	158734508	158734577	69	-	36.1789	0	37.1789	8.88261e-13
SINE	Alu	B1_Mur1	chr4	161238498	161238629	131	+	36.1667	0	37.1667	1.4184e-12
SINE	B2	B3A	chr2	24800163	24800302	139	-	36.1603	0	37.1603	8.61007e-13
SINE	Alu	PB1D7	chr7	111003709	111003826	117	+	36.1538	0	37.1538	1.44235e-12
SINE	B2	B3A	chr13	81726618	81726775	157	+	36.1446	0	37.1446	8.48612e-13
LTR	ERVK	RLTR21	chr16	14726275	14726422	147	-	36.1429	0	37.1429	8.62301e-13
SINE	B4	B4A	chr14	85458716	85458857	141	+	53.4368	0.46575	37.1392	1.20287e-12
SINE	B2	B3	chr3	40955884	40956060	176	-	36.1381	0	37.1381	8.03297e-13
SINE	Alu	B1F	chr4	117394903	117395042	139	-	113	2.07	37.1336	2.86461e-12
SINE	Alu	B1_Mur4	chr17	33081933	33082037	104	+	113	2.07	37.1336	9.46125e-13
SINE	B4	RSINE1	chr6	26369565	26369698	133	-	36.1229	0	37.1229	8.65184e-13
SINE	B2	B2_Rat2	chr6	76067663	76067725	62	+	36.1171	0	37.1171	1.14254e-12
SINE	B2	B3	chr13	47510485	47510650	165	-	36.1119	0	37.1119	8.00354e-13
SINE	B4	B4	chr5	58563569	58563767	198	-	47.0857	0.295714	37.1114	7.16931e-13
SINE	B4	ID_B1	chr7	49981743	49981921	178	+	36.0769	0	37.0769	7.90335e-13
SINE	B4	B4	chr12	14367198	14367467	269	+	123.696	2.36572	37.0488	9.27114e-13
SINE	B4	B4	chr12	23502142	23502346	204	-	189.354	4.14	37.0339	1.43057e-12
SINE	B2	B3A	chr18	79116520	79116697	177	+	36.0169	0	37.0169	8.00542e-13
SINE	Alu	PB1	chr1	109077961	109078046	85	+	36.0111	0	37.0111	7.98824e-13
SINE	MIR	MIR	chr1	158335231	158335365	134	-	36.0054	0	37.0054	8.5815e-13
SINE	MIR	MIR	chr16	10792279	10792456	177	+	36	0	37	7.99879e-13
SINE	B2	B3A	chr5	95533170	95533334	164	+	36	0	37	1.19924e-12
SINE	B4	RSINE1	chr12	25926481	25926627	146	+	36	0	37	5.00158e-12
[truncated: 4,681 more rows]

## Sheet: RAT TDP43 depleted
			TDP-43 depleted
class	family	annotation	chrom	start	end	length	strand	tdp43	control	Fold change	p-value
SINE	B4	ID_B1	chr19	14869281	14869328	47	+	0	33.12	34.12	2.2904e-06
SINE	MIR	MIRb	chr7	31985232	31985329	97	-	0	24.84	25.84	1.62569e-07
Low_complexity	Low_complexity	AT_rich	chr19	26394968	26395012	44	+	0	14.49	15.49	2.85858e-07
SINE	ID	ID_Rn1	chr13	71515944	71516038	94	+	7.05357	100.828	14.2947	1.05287e-10
SINE	Alu	B1_Rn	chr14	82679309	82679321	12	+	0	8.28	9.28	6.21923e-08
Low_complexity	Low_complexity	AT_rich	chr3	68097828	68097859	31	+	0	8.28	9.28	1.68915e-09
Low_complexity	Low_complexity	AT_rich	chr3	87640015	87640037	22	+	0	8.28	9.28	1.32588e-06
LTR	ERVK	RMER3B	chr9	44803581	44803666	85	-	6.62897	53.7461	8.10776	3.43323e-06
LTR	ERVK	RMER3B	chr6	16689348	16689511	163	+	11.8583	88.9953	7.5049	1.43609e-10
Low_complexity	Low_complexity	AT_rich	chr1	149275134	149275162	28	+	0	6.21	7.21	5.88835e-06
Low_complexity	Low_complexity	GC_rich	chr1	263931309	263931333	24	+	0	6.21	7.21	1.38354e-07
Low_complexity	Low_complexity	AT_rich	chr14	37316810	37316831	21	+	0	6.21	7.21	4.34795e-08
SINE	Alu	B1_Mur3	chr18	64165803	64165928	125	-	12.5	83.835	6.7068	6.80125e-10
LTR	ERVL	MT2B2	chr7	23464906	23464918	12	-	2	12.42	6.21	7.2606e-06
Low_complexity	Low_complexity	GC_rich	chr10	47327747	47327782	35	+	3	18.63	6.21	2.7934e-06
Low_complexity	Low_complexity	AT_rich	chr1	79789870	79789895	25	+	3	18.63	6.21	1.18257e-09
LINE	CR1	L3	chr14	79084630	79084695	65	-	5	31.05	6.21	8.12142e-09
rRNA	rRNA	LSU-rRNA_Hsa	chr4	13210457	13210696	239	-	30.75	187.335	6.0922	9.93917e-11
SINE	Alu	PB1D9	chr1	94840650	94840753	103	-	9	53.82	5.98	2.33943e-10
Low_complexity	Low_complexity	GC_rich	chr20	41307941	41307971	30	+	3	16.56	5.52	2.94677e-10
LTR	ERV1	NICER_Rn	chr2	246201	246730	499	-	352.717	1741.32	4.93686	3.43987e-06
LTR	ERV1	NICER_Rn	chr2	133967	134496	529	-	309.987	1456.02	4.69703	3.43977e-06
rRNA	rRNA	SSU-rRNA_Hsa	chr15	77296157	77296355	198	+	68.6428	319.194	4.65007	6.90737e-10
LTR	ERVK	RMER3B	chr16	90024294	90024375	6	-	39.5333	183.644	4.64529	5.169e-06
SINE	Alu	PB1D7	chr1	79004549	79004667	118	+	11	49.68	4.51636	2.63854e-10
rRNA	rRNA	LSU-rRNA_Hsa	chr11	10212429	10212668	67	-	2405.59	10618	4.41387	7.91422e-06
LTR	ERVK	RMER3-int	chr4	139248739	139249725	524	-	1007.65	4407.8	4.37433	3.01702e-09
Satellite	Satellite	SATI_RN	chr20	25103622	25103712	90	-	10.931	46.646	4.26731	4.57482e-11
LTR	ERVK	RNERVK22	chr3	1277430	1277511	81	-	152.323	634.865	4.16789	6.03392e-07
LTR	ERVL-MaLR	MTC	chr1	201578634	201578828	194	-	165.5	686.507	4.14808	9.60623e-07
Satellite	Satellite	SATI_RN	chr20	25104502	25104592	90	-	10.2475	42.506	4.14794	4.57482e-11
LTR	ERV1	RNLTR10-int	chr2	15511698	15512078	380	+	276.602	1128.18	4.07872	2.28371e-06
rRNA	rRNA	LSU-rRNA_Hsa	chr3	1277596	1278008	412	-	5246.68	21354.7	4.07014	6.03392e-07
rRNA	rRNA	LSU-rRNA_Hsa	chr9	44803666	44804065	399	-	1563.56	6352.48	4.06283	3.43323e-06
LTR	ERV1	RNLTR10-int	chr1	28416551	28416890	339	+	339.786	1374.04	4.04384	7.24229e-10
LTR	ERV1	RNLTR10-int	chr2	151220796	151221182	386	-	337.836	1364.45	4.0388	3.43907e-06
LTR	ERV1	RNLTR10-int	chr19	33651727	33652023	296	+	340.986	1376.53	4.0369	3.30917e-06
rRNA	rRNA	LSU-rRNA_Hsa	chr8	19371576	19371999	198	-	8241.16	33107.6	4.01734	8.55731e-07
SINE	Alu	B1_Rn	chr5	140191934	140192008	74	-	278.525	1114.82	4.0026	2.28357e-06
LTR	ERV1	RNLTR10-int	chr2	2438632	2439008	376	+	259.323	1029.46	3.96982	2.28208e-06
LTR	ERVK	RMER3B	chr3	1277511	1277596	85	-	4806.58	18941	3.94065	6.03392e-07
rRNA	rRNA	LSU-rRNA_Hsa	chr4	139249810	139250189	379	-	6926.25	27271.2	3.93737	3.01702e-09
LTR	ERV1	RNLTR10-int	chr13	87624071	87624413	342	-	288.674	1125.04	3.89727	2.28304e-06
LTR	ERVK	RMER3-int	chr3	96973261	96973699	438	-	253.637	983.701	3.87838	2.27906e-06
LTR	ERVK	RMER13B	chr15	77295287	77296120	19	+	2190.12	8336.88	3.80659	6.90737e-10
LTR	ERVK	RMER3-int	chr9	44803495	44803581	86	-	357.527	1345.43	3.76314	3.43323e-06
Satellite	Satellite	91ES8_RN	chr20	25105403	25105458	55	+	9	33.4355	3.71505	4.57482e-11
LTR	ERVK	RMER3B	chr3	96973699	96973785	1	-	6607.89	24496.8	3.7072	2.27906e-06
SINE	Alu	PB1D9	chr15	50936573	50936658	85	+	566.833	2083.45	3.67561	2.75774e-10
LTR	ERVK	RNERVK23	chr7	14674207	14674370	163	+	375.605	1379.12	3.67173	7.76464e-06
Low_complexity	Low_complexity	AT_rich	chr6	91323062	91323098	36	+	6.79286	24.7019	3.63646	1.24444e-09
rRNA	rRNA	LSU-rRNA_Hsa	chr11	21634100	21634465	365	+	15464.9	55854.8	3.61171	4.64035e-08
rRNA	rRNA	LSU-rRNA_Hsa	chr5	148035794	148035914	120	+	24.3333	87.5956	3.59982	2.15812e-10
rRNA	rRNA	LSU-rRNA_Hsa	chr3	6355094	6355257	163	+	21.1167	75.6471	3.58234	1.47127e-08
LTR	ERVK	MYSERV6	chrX	159022162	159023191	38	-	1011.51	3578.31	3.53759	3.0677e-10
rRNA	rRNA	LSU-rRNA_Hsa	chr12	16647330	16648665	1335	-	1023.83	3584.12	3.5007	2.13703e-10
SINE	Alu	B1F	chr8	60236724	60236892	168	-	268	931.5	3.47575	2.19065e-06
SINE	Alu	B1F	chr8	60109609	60109745	136	-	268	931.5	3.47575	2.19065e-06
LTR	ERV1	RNLTR10-int	chr13	30160751	30161001	49	+	1124.32	3886.59	3.45684	1.77738e-10
SINE	ID	ID_Rn2	chr4	184112690	184112785	84	+	167.463	578.393	3.45386	2.30198e-10
SINE	Alu	B1F	chr7	67182374	67182528	154	-	19.8074	68.31	3.44871	2.10387e-10
Low_complexity	Low_complexity	AT_rich	chr5	126881680	126881710	30	+	4.9	16.8015	3.42888	1.24033e-10
rRNA	rRNA	LSU-rRNA_Hsa	chr12	16621546	16623001	900	-	238.116	815.125	3.42322	9.21075e-11
LTR	ERVK	RMER3B	chr7	14674122	14674207	6	+	1478.9	4990.42	3.37441	7.76464e-06
rRNA	rRNA	LSU-rRNA_Hsa	chr17	62932244	62932984	56	-	61860.6	207909	3.36092	7.12902e-10
rRNA	rRNA	SSU-rRNA_Hsa	chr8	118396555	118397067	45	+	19497.8	65203.6	3.34415	1.153e-06
rRNA	rRNA	LSU-rRNA_Hsa	chr4	34572651	34572871	220	-	674.746	2253.15	3.33926	7.76464e-06
LTR	ERVK	RLTR19-int	chr5	40773658	40773939	281	+	184.194	614.74	3.33746	1.45649e-09
LTR	ERVK	RMER3B	chr4	139249725	139249810	85	-	491.316	1637.87	3.33364	3.01702e-09
rRNA	rRNA	LSU-rRNA_Hsa	chr12	16665703	16667187	986	-	233.145	764.087	3.2773	1.96915e-10
rRNA	rRNA	LSU-rRNA_Hsa	chr12	16632444	16633173	729	-	233.52	765.267	3.27709	1.78082e-10
rRNA	rRNA	LSU-rRNA_Hsa	chr12	16606260	16607310	909	-	236.48	774.033	3.27314	2.39994e-10
rRNA	rRNA	LSU-rRNA_Hsa	chr12	16642108	16643597	996	-	623.991	1990.58	3.19008	2.14998e-08
rRNA	rRNA	LSU-rRNA_Hsa	chr12	16611127	16612609	908	-	626.316	1993.4	3.18274	3.68526e-08
SINE	Alu	PB1D10	chr16	19809182	19809272	90	+	15	47.61	3.174	1.37588e-10
DNA	hAT-Charlie	MER3	chrX	94829443	94829609	8	-	1617.57	5039.41	3.11542	1.61386e-08
rRNA	rRNA	LSU-rRNA_Hsa	chr17	62933409	62934254	491	-	26065.3	81061.8	3.10995	5.33584e-06
rRNA	rRNA	LSU-rRNA_Hsa	chr3	60964638	60964815	14	+	1999.4	6082.34	3.04208	3.22481e-06
rRNA	rRNA	LSU-rRNA_Hsa	chr12	16616320	16617804	699	-	1410.49	4147.93	2.94077	6.84123e-08
rRNA	rRNA	LSU-rRNA_Hsa	chr12	16660316	16661763	699	-	1410.49	4147.93	2.94077	2.0926e-08
LTR	ERVK	RNERVK9	chr16	38066856	38068046	499	+	10852.3	31323.7	2.88636	1.86009e-06
SINE	ID	ID_Rn1	chr9	104477231	104477327	96	-	29.4	81.5926	2.77526	4.96311e-09
rRNA	rRNA	LSU-rRNA_Hsa	chrX	42289065	42289333	268	+	641.595	1764.98	2.75092	5.30107e-06
rRNA	rRNA	SSU-rRNA_Hsa	chr17	89527720	89527946	45	-	2439.01	6671.75	2.73544	2.1993e-09
rRNA	rRNA	LSU-rRNA_Hsa	chrX	81509513	81509755	54	-	2730.12	7464.67	2.73419	5.16802e-06
SINE	B4	ID_B1	chr17	62909717	62909831	114	+	34.7286	94.41	2.71851	5.25208e-10
LTR	ERVK	RNLTR9	chr3	60964815	60964874	59	-	392.512	1057.91	2.69523	3.22481e-06
LTR	ERV1	RNLTR10A	chr2	151220525	151220699	174	+	791.497	2128.19	2.68881	3.43907e-06
LTR	ERV1	RNLTR10-int	chr1	28416982	28417253	271	+	185.053	484.405	2.61765	7.24229e-10
rRNA	rRNA	SSU-rRNA_Hsa	chr2	100730440	100730718	278	-	503.474	1301.81	2.58565	2.23547e-10
SINE	Alu	7SLRNA	chr12	22851181	22851493	312	-	269.77	682.754	2.53088	2.5855e-09
SINE	Alu	7SLRNA	chr6	91117283	91117583	300	+	289.491	729.882	2.52126	1.1749e-09
SINE	Alu	7SLRNA	chr6	91323106	91323406	300	-	289.491	729.882	2.52126	1.24444e-09
Satellite	Satellite	SATI_RN	chr20	25105963	25106054	91	-	17.7866	44.6431	2.50993	4.57482e-11
SINE	Alu	7SLRNA	chr19	22757529	22757849	320	+	274.172	679.43	2.47812	3.11707e-09
LTR	ERV1	RNLTR10-int	chr2	26827756	26828068	312	-	287.886	709.575	2.46478	1.13704e-08
SINE	Alu	7SLRNA	chr10	59473911	59474232	321	+	266.311	640.189	2.40391	1.07623e-09
SINE	Alu	PB1D9	chr20	3062382	3062475	93	-	32	76.59	2.39344	1.08222e-10
LINE	L2	L2	chr6	134122497	134122683	186	+	45	101.43	2.254	1.70558e-11
DNA	hAT-Tip100	FordPrefect	chr6	71414379	71414563	184	+	66.1393	148.614	2.24698	1.14877e-09
DNA	hAT-Tip100	FordPrefect	chr8	104424510	104424722	212	-	177.243	396.291	2.23586	1.33312e-10
rRNA	rRNA	SSU-rRNA_Hsa	chr2	771201	771958	199	+	13418.7	28443.9	2.11972	3.32302e-08
Satellite	Satellite	SATI_RN	chr20	25105674	25105764	90	-	20.4833	43.3924	2.11843	4.57482e-11
DNA	hAT-Tip100	FordPrefect	chr1	70432153	70432337	184	-	130.773	275.73	2.10846	5.28143e-11
SINE	B4	RSINE1	chr16	19812070	19812229	159	+	79.5	162.495	2.04396	1.37588e-10
SINE	ID	ID4_	chr18	36618891	36618971	80	+	31	62.1	2.00323	7.65728e-09

## Sheet: Human Healthy enriched
			Healthy brain enriched
class	family	annotation	chrom	start	end	length	strand	Healthy sample 1	Healthy sample 2	Healthy sample 3	FTLD sample 1	FTLD sample2	FTLD sample3	Foldchange	p-value
SINE	Alu	AluJb	chr4	102213003	102213233	230	+	31.64	1.91306	8	0	0.0181818	0.0230721	40.8671	7.79211e-08
LINE	L1	L1ME4a	chr14	101319924	101320109	185	-	0	35.91	14	1	0	0	25.455	0
RNA	RNA	7SK	chr2	220455467	220455706	239	-	35.7833	3.84097	0	1	0	0	20.3122	3.60676e-06
Low_complexity	Low_complexity	GC_rich	chr15	64125904	64125932	28	+	1.50667	0	10.0351	0	0.0231885	0	12.2575	4.44174e-07
LINE	L2	L2c	chr14	101320140	101320303	163	+	9.04	45.36	33	0	3.2	3.3	11.7867	0
SINE	MIR	MIRc	chr14	101317363	101317491	128	+	0	11.34	12	0	0	1.1	11.5905	0
SINE	MIR	MIRb	chr11	84530150	84530320	170	-	0	1.89	8.52272	0	0	0.0130953	11.2652	2.52221e-07
LINE	L1	HAL1-2a_MD	chr10	12455474	12455619	145	-	0	4.2525	12	0	0	0.55	11.1306	7.54358e-09
RNA	RNA	7SK	chr20	33969363	33969610	247	-	34.2229	4.86	4.228	2.68407	0.914286	0.120879	9.38942	7.01435e-07
LINE	CR1	L3	chr14	101320697	101320846	149	+	0	7.56	10	1	0	0	9.28	0
LINE	L2	L2b	chr7	105373819	105373925	106	-	1	8.5	0	0	0	0.197664	8.76707	9.50889e-10
SINE	MIR	MIRb	chr11	84530030	84530108	78	-	0	0	8.05424	0	0.0554386	0	8.57865	2.52221e-07
LINE	L1	L1MEc	chr2	122236623	122237101	478	+	18.08	2.33625	6.89546	1	0.174414	1.1647	8.4788	1.56483e-06
SINE	MIR	MIRc	chr15	73893364	73893584	220	-	6	2	0	0	0	0.0694118	8.41584	4.87172e-09
LTR	ERVL	LTR33	chr5	149578129	149578374	245	-	3	4.33333	0	0	0	0.0582791	7.87442	1.01872e-10
LTR	ERVL-MaLR	MLT1F1	chr17	78953046	78953202	156	-	6	0	0	0	0	0.0722293	6.52845	3.81754e-08
LINE	L1	HAL1-3A_ME	chr4	187407196	187407282	86	+	0.553149	0.945	4.56578	0	0.0253968	0.0647058	6.48006	4.4682e-07
SINE	MIR	MIRb	chr14	101326219	101326382	163	+	0	7.56	8	0	1.6	0	6.36923	0
LINE	L1	L1MC4	chr17	79048628	79048744	116	+	2	4	0	0	0	0.100684	6.35968	1.02141e-14
LINE	L1	L1MB7	chr8	4389219	4389393	174	-	3.30952	2.26667	0	0	0	0.0616476	6.19432	1.33227e-15
LINE	L1	HAL1-2a_MD	chr8	1285525	1285707	182	-	0	0.00954546	20.188	0.0666667	1.72421	0.738405	6.0062	3.42891e-10
LINE	L1	L1M5	chr7	130592235	130592359	124	+	4.39792	0.590909	0	0	0	0.0759511	5.56608	1.47764e-08
tRNA	tRNA	tRNA-Leu-TTA	chr6	27688897	27688980	83	-	3.08249	2	0	0	0	0.116975	5.4455	9.87341e-06
SINE	MIR	MIR	chr8	1061304	1061390	86	+	1	4	0	0	0	0.113678	5.38755	0
Low_complexity	Low_complexity	A-rich	chr14	101312936	101313012	76	+	4.52	26.46	6	1	3.2	2.2	5.13243	0
DNA	TcMar-Tigger	Tigger7	chr8	1050535	1050601	66	+	0	4.5	0	0	0	0.134328	4.84869	3.91429e-08
LINE	L2	L2b	chr9	138644359	138644452	93	+	0.0807141	3.78	5	0	0	1.10859	4.67645	3.86358e-14
LTR	ERVL	LTR33	chr5	149578427	149578538	111	-	1	3	0	0	0	0.0704464	4.67095	1.01872e-10
DNA	hAT-Charlie	MER20	chr19	3234401	3234599	198	+	2	2	0	0	0	0.0845226	4.61032	1.55399e-06
LINE	L2	L2b	chr19	11467240	11467326	86	+	1	3	0	0	0	0.0906897	4.58426	5.95191e-13
LINE	L1	L1ME1	chr7	70633858	70633941	83	-	2	2	0	0	0	0.092619	4.57616	4.43712e-06
Low_complexity	Low_complexity	GA-rich	chr14	101317185	101317249	64	+	0	3.78	4	0	0	1.1	4.18095	0
DNA	hAT-Charlie	MER20	chr15	84227211	84227236	25	+	1.13	0	2.01142	0.0075188	0.0183909	0.00791366	4.00593	2.08446e-06
LTR	ERVL-MaLR	MLT1K	chr1	15198231	15198393	162	-	9.04	0	0	0	1.6	0	3.86154	1.73813e-06
LINE	L2	L2b	chr10	11325326	11325418	92	+	0	6.29999	6.66666	0	1.6	1.1	3.77477	2.14165e-09
DNA	hAT-Charlie	Charlie2a	chr13	108174329	108174426	97	+	1	2	0	0	0	0.060102	3.77322	6.36699e-08
SINE	MIR	MIR	chr13	67425644	67425707	63	+	0	0	11.2729	0	0.0251435	2.23182	3.76819	8.06284e-06
LINE	L1	L1ME4a	chr11	48039584	48039733	149	-	2	1	0	0	0	0.0686667	3.74298	4.35928e-06
LINE	L2	L2b	chr3	10398731	10398795	64	-	3	0	0	0	0	0.0872308	3.67907	9.05153e-07
DNA	hAT-Charlie	MER102c	chr12	121093244	121093306	62	+	3	0	0	0	0	0.09	3.66972	1.68286e-10
Low_complexity	Low_complexity	GC_rich	chr21	9826809	9826861	52	+	3.01333	0.629999	4	0.333333	1.06667	0	3.60139	0
Low_complexity	Low_complexity	GC_rich	chrUn_gl000220	108885	108937	52	+	3.01333	0.629999	4	0.333333	1.06667	0	3.60139	0
Low_complexity	Low_complexity	GC_rich	chrUn_gl000220	152857	152909	52	+	3.01333	0.629999	4	0.333333	1.06667	0	3.60139	0
LTR	ERVL-MaLR	MLT1B	chr14	79730731	79730865	134	-	4.52	3.78	0.017094	0	1.6	0.01	3.56977	6.18524e-07
LINE	L1	HAL1-2a_MD	chr8	143582852	143583057	205	-	0	0	12.6009	0	1.06667	1.76	3.55425	2.26345e-06
SINE	MIR	MIRb	chr14	101322794	101322840	46	+	0	3.78	8	1	1.6	0	3.55	0
DNA	hAT-Charlie	Charlie2a	chr13	108174170	108174272	102	+	0	3.78	4	0	1.60813	0	3.3664	6.36699e-08
LTR	ERVL-MaLR	MLT1B	chr14	79730918	79731078	160	-	0	5.67	8.33334	0	1.6	2.2	3.1257	6.18524e-07
LINE	L2	L2a	chr14	101323319	101323382	63	+	0	5.81538	6	0	3.2	0	3.05128	0
LINE	L1	HAL1	chr9	140675264	140675445	181	-	0	0.343636	14.5591	0.666667	1.22424	2.54047	2.92794	6.71145e-08
LINE	L2	L2c	chr9	101200768	101200834	66	-	0	2	0	0	0	0.0597015	2.83099	2.01021e-06
LTR	ERVL-MaLR	MLT1C	chr2	236630850	236630979	129	-	1	1	0	0	0	0.0646923	2.81772	4.35928e-06
SINE	MIR	MIRc	chr14	101326080	101326139	59	+	1	1	0	0	0	0.0648333	2.81734	0
snRNA	snRNA	U3	chr17	19015732	19015949	217	-	30.2087	10.7415	19.7193	4.50833	8.51486	8.525	2.73501	3.41867e-06
DNA	hAT-Blackjack	MER94B	chr10	12455690	12455782	92	+	0	5.67	0	0	1.6	0	2.56538	7.54358e-09
LINE	L1	L1ME4a	chr14	101320536	101320662	126	-	0	3.78	14	0	6.4	0	2.53784	0
tRNA	tRNA	tRNA-Ser-TCA(m)	chrM	7448	7515	67	-	33.9	4.40999	12.3333	6.5	8	7.05834	2.28932	0
SINE	MIR	MIR	chr18	13445879	13446070	191	+	0	1.89	28	2	8	3.3	2.16014	2.18735e-09
tRNA	tRNA	tRNA-Thr-ACA	chr14	21099317	21099391	74	-	0	15.1725	12.9	5.13596	2.66667	4.98666	2.10834	3.3921e-06
SINE	Alu	AluSz	chr7	143082751	143083037	286	-	0	7.56	8.04	0	4.8	2.27857	2.05482	1.87828e-12
SINE	MIR	MIR	chr6	69811615	69811753	138	-	4.52	1.91223	0.595238	0	1.6	1.46666	1.97397	2.04807e-07

## Sheet: FTLD-TDP enriched
				FTLD-TDP enriched
class	family	annotation	chrom	start	end	length	strand	Healthy sample 1	Healthy sample 2	Healthy sample 3	FTLD sample 1	FTLD sample2	FTLD sample3	Foldchange	p-value
rRNA	rRNA	LSU-rRNA_Hsa	chrUn_gl000220	114132	114194	62	+	0	0	1	4.5	0.8	5.5	10.8	0
rRNA	rRNA	LSU-rRNA_Hsa	chrUn_gl000220	158104	158166	62	+	0	0	1	4.5	0.8	5.5	10.8	0
snRNA	snRNA	U1	chr16	3132165	3132234	69	+	0.265882	0.0899999	7.02254	11.6801	13.8873	13.8615	5.34381	1.06779e-06
rRNA	rRNA	LSU-rRNA_Hsa	chr6	144692196	144692284	88	-	0	0.378	4.78334	12.0417	4.64	7.65547	4.71528	3.07722e-06
rRNA	rRNA	LSU-rRNA_Hsa	chr8	21455971	21456306	335	+	4.52	0.378	7.46666	15.5333	9.04	11.165	2.89036	8.20064e-06
